# Supplementary material for: Supervised Statistical Learning Prediction of Soybean Varieties and Cultivation Sites Using Rapid UPLC-MS Separation, Method Validation, and Targeted Metabolomic Analysis of 31 Phenolic Compounds in the Leaves
Source: MDPI journal article supplement (doi:10.3390/metabo11120884), 2021-12-17
Supplement: s1 [file s1]

*Article*

# **Supervised Statistical Learning Prediction of Soybean Varieties and Cultivation Sites Using Rapid UPLC-MS Separation, Method Validation, and Targeted Metabolomic Analysis of 31 Phenolic Compounds in the Leaves**

**Chan-Su Rha <sup>1,\*</sup>, Eun Kyu Jang <sup>2</sup>, Yong Deog Hong <sup>1</sup> and Won Seok Park <sup>1</sup>**

<sup>1</sup> AMOREPACIFIC R&D Center, Yongin 17074, Korea; hydhong@amorepacific.com (Y.D.H.);

wspark@amorepacific.com (W.S.P.)

<sup>2</sup> Gyeonggi-do Agricultural Research & Extension Services, Hwaseong 18388, Korea; jek0428@gg.go.kr

\* Correspondence: teaman@amorepacific.com; Tel.: +82-(31)-2805981

## **Supplementary Materials**

## Table of Contents

### Tables

|                                                                                               |    |
|-----------------------------------------------------------------------------------------------|----|
| Table S1. Purity of compounds used in method validation and conditions of mass detection..... | 3  |
| Table S2. Content of phenolic classes in the soybean leaves by cultivation days.....          | 4  |
| Table S3. Content of phenolic compounds in soybean leaves per dry weight. ....                | 5  |
| Table S4. Content of phenolic compounds in soybean leaves per plant. ....                     | 7  |
| Table S5. Summary of machine learning models.....                                             | 9  |
| Table S6. Key compounds obtained using cut-off criteria of S-plot (SIMCA).....                | 10 |
| Table S7. Key compounds obtained using cut-off criteria of VIP (SIMCA) .....                  | 11 |
| Table S8. Key compounds obtained using cut-off criteria of machine learning (JMP pro).....    | 12 |
| Table S9. Example of prediction results executed by Python code.....                          | 13 |

### Figures

|                                                                                              |    |
|----------------------------------------------------------------------------------------------|----|
| Figure S1. Preparative HPLC chromatograms for the purified compounds of soybean leaves. .... | 14 |
| Figure S2. Mass spectra of precursors and fragments of purified compounds from CJ.....       | 15 |
| Figure S3. Mass spectra of precursors and fragments of purified compounds from DW. ....      | 16 |
| Figure S4. Mass spectra of precursors and fragments of purified compounds from NP.....       | 17 |
| Figure S5. Mass spectra of precursors and fragments of purified compounds from WR. ....      | 19 |
| Figure S6. Spectral purity calculation for the purified compounds CJ1.....                   | 20 |
| Figure S7. Spectral purity calculation for the purified compounds CJ2.....                   | 21 |
| Figure S8. Spectral purity calculation for the purified compounds DW1. ....                  | 22 |
| Figure S9. Spectral purity calculation for the purified compounds DW2. ....                  | 23 |
| Figure S10. Spectral purity calculation for the purified compounds NP1.....                  | 24 |
| Figure S11. Spectral purity calculation for the purified compounds NP2.....                  | 25 |
| Figure S12. Spectral purity calculation for the purified compounds WR1. ....                 | 26 |
| Figure S13. Spectral purity calculation for the purified compounds WR2. ....                 | 27 |
| Figure S14. Spectral purity calculation for the purified compounds WR3. ....                 | 28 |
| Figure S15. Overlaid single ion recoding mass chromatograms of 31 compounds. ....            | 29 |
| Figure S16. Multivariate analysis of SL metabolites. ....                                    | 30 |
| Figure S17. Prediction results of Neural model of machine learning. ....                     | 31 |

### Script

|                                                                           |    |
|---------------------------------------------------------------------------|----|
| Script S1. Python code for prediction of the discriminative classes. .... | 32 |
|---------------------------------------------------------------------------|----|

Table S1. Purity of compounds used in method validation and conditions of mass detection

| No. <sup>a</sup> | Class <sup>b</sup> | Compound                                |                     | Purity (fraction)        |                         | Mass detection          |                       |                 |                    |                    |
|------------------|--------------------|-----------------------------------------|---------------------|--------------------------|-------------------------|-------------------------|-----------------------|-----------------|--------------------|--------------------|
|                  |                    | Name                                    | Source <sup>c</sup> | Stand-alone <sup>d</sup> | Calculated <sup>e</sup> | <i>m/z</i> <sup>f</sup> | Polarity <sup>g</sup> | RT <sup>h</sup> | SIR-S <sup>i</sup> | SIR-E <sup>j</sup> |
| 1                | FL                 | quercetin 3- <i>O</i> -tri-glycoside A  | CJ1                 | 0.950                    | 1.235                   | 771.20                  | N                     | 1.04            | 0.80               | 1.41               |
| 2                | FL                 | quercetin 3- <i>O</i> -tri-glycoside B  | CJ2                 | 0.640                    | 0.640                   | 771.20                  | N                     | 1.09            | 0.80               | 1.41               |
| 3                | FL                 | quercetin 3- <i>O</i> -di-glycoside A   | NP1                 | 0.950                    | 1.026                   | 625.20                  | N                     | 1.34            | 1.00               | 1.73               |
| 4                | FL                 | quercetin 3- <i>O</i> -di-glycoside B   | NP2                 | 0.900                    | 0.900                   | 625.20                  | N                     | 1.40            | 1.00               | 1.73               |
| 5                | IS                 | daidzin                                 | reagent             | 0.980                    | 1.011                   | 417.11                  | P                     | 1.45            | 1.10               | 1.75               |
| 6                | FL                 | kaempferol 3- <i>O</i> -tri-glycoside A | DW1                 | 0.988                    | 1.086                   | 755.20                  | N                     | 1.48            | 1.18               | 1.95               |
| 7                | FL                 | kaempferol 3- <i>O</i> -tri-glycoside B | DW2                 | 0.900                    | 0.900                   | 755.20                  | N                     | 1.62            | 1.18               | 1.95               |
| 8                | IS                 | glycitin                                | reagent             | 0.980                    | 0.984                   | 447.12                  | P                     | 1.67            | 1.40               | 1.97               |
| 9                | FL                 | kaempferol 3- <i>O</i> -tri-glycoside C | WR1                 | 0.900                    | 0.900                   | 739.20                  | N                     | 2.01            | 1.80               | 2.51               |
| 10               | FL                 | rutin                                   | reagent             | 0.940                    | 0.940                   | 609.15                  | N                     | 2.45            | 1.90               | 2.69               |
| 11               | FL                 | isoquercitrin                           | reagent             | 0.900                    | 0.900                   | 463.10                  | N                     | 2.61            | 2.30               | 2.81               |
| 12               | IS                 | genistin                                | reagent             | 0.980                    | 0.985                   | 433.11                  | P                     | 2.70            | 2.34               | 2.91               |
| 13               | FL                 | kaempferol 3- <i>O</i> -di-glycoside A  | WR2                 | 0.960                    | 0.960                   | 593.15                  | N                     | 2.72            | 2.38               | 3.15               |
| 14               | FL                 | kaempferol 3- <i>O</i> -di-glycoside B  | WR3                 | 0.977                    | 0.977                   | 593.15                  | N                     | 2.91            | 2.38               | 3.15               |
| 15               | IS                 | malonyl daidzin                         | reagent             | 0.900                    | 0.912                   | 503.11                  | P                     | 2.92            | 2.68               | 3.13               |
| 16               | IS                 | malonyl glycitin                        | reagent             | 0.900                    | 0.901                   | 533.12                  | P                     | 2.98            | 2.74               | 3.21               |
| 17               | FL                 | astragalin                              | reagent             | 0.970                    | 0.970                   | 447.09                  | N                     | 3.03            | 2.80               | 3.29               |
| 18               | FE                 | apigenin 7- <i>O</i> -glucoside         | reagent             | 0.970                    | 0.970                   | 431.02                  | N                     | 3.16            | 3.02               | 3.31               |
| 19               | IS                 | acetyl daidzin                          | reagent             | 0.900                    | 0.900                   | 459.12                  | P                     | 3.31            | 3.04               | 3.55               |
| 20               | IS                 | acetyl glycitin                         | reagent             | 0.900                    | 0.900                   | 489.13                  | P                     | 3.38            | 3.14               | 3.61               |
| 21               | IS                 | malonyl genistin                        | reagent             | 0.900                    | 0.900                   | 519.11                  | P                     | 3.45            | 3.24               | 3.71               |
| 22               | IS                 | daidzein                                | reagent             | 0.980                    | 0.980                   | 255.06                  | P                     | 3.79            | 3.60               | 4.01               |
| 23               | IS                 | acetyl genistin                         | reagent             | 0.900                    | 0.900                   | 475.12                  | P                     | 3.97            | 3.70               | 4.09               |
| 24               | IS                 | glycitein                               | reagent             | 0.980                    | 0.980                   | 285.07                  | P                     | 4.01            | 3.78               | 4.11               |
| 25               | FE                 | luteolin                                | reagent             | 0.980                    | 0.980                   | 285.04                  | N                     | 4.19            | 3.92               | 4.35               |
| 26               | FL                 | quercetin                               | reagent             | 0.950                    | 0.950                   | 301.04                  | N                     | 4.21            | 3.94               | 4.37               |
| 27               | IS                 | genistein                               | reagent             | 0.980                    | 0.980                   | 271.05                  | P                     | 5.40            | 5.14               | 5.71               |
| 28               | FE                 | apigenin                                | reagent             | 0.950                    | 0.950                   | 269.05                  | N                     | 5.51            | 5.18               | 5.75               |
| 29               | CM                 | coumestrol                              | reagent             | 0.950                    | 0.950                   | 267.04                  | N                     | 5.58            | 5.24               | 5.85               |
| 30               | FL                 | kaempferol                              | reagent             | 0.970                    | 0.970                   | 285.05                  | N                     | 5.65            | 5.40               | 6.21               |
| 31               | FL                 | isorhamnetin                            | reagent             | 0.950                    | 0.950                   | 315.06                  | N                     | 5.71            | 5.50               | 6.31               |

<sup>a</sup> Numbered in the order of retention time (RT). <sup>b</sup> CM, coumestrol; FE, flavone; FL, flavanol; and IS, isoflavone. <sup>c</sup> CJ1–2, from CJ (Cheng-ja soybean variety); DW1–2, from DW (Dae-won);

NP1–2, from NP (Nok-poong); and WR1–3, WR(Woo-ram). <sup>d</sup> Purity of the single compound itself. <sup>e</sup> Purity in the combined solution. <sup>f</sup> Mass-to-charge ratio. <sup>g</sup> N, negative and P, positive. <sup>h</sup>

Average RT (min) obtained from the validation test. <sup>i</sup> Single ion recoding start (min). <sup>j</sup> Single ion recoding end (min).

Table S2. Content of phenolic classes in the soybean leaves by cultivation days

(A) per dry weight of soybean leaf (unit:  $\mu\text{g/g}$  dry weight)

| Day | Variety <sup>a</sup> | Compound class <sup>b</sup> |                    |                       |                      |
|-----|----------------------|-----------------------------|--------------------|-----------------------|----------------------|
|     |                      | CM                          | FE                 | FL                    | IS                   |
| 30  | CJ (PJ)              | LL <sup>c</sup>             | 14.85 $\pm$ 1.96a  | 1331.83 $\pm$ 132.09a | 89.43 $\pm$ 2.52b    |
|     | CJ (YC)              | LL                          | 13.20 $\pm$ 2.24a  | 1640.15 $\pm$ 234.84a | 395.63 $\pm$ 56.41a  |
|     | DW                   | 5.43 $\pm$ 2.47             | 6.83 $\pm$ 1.12b   | 482.38 $\pm$ 93.76b   | 249.30 $\pm$ 59.96a  |
| 60  | CJ (PJ)              | LL                          | 30.44 $\pm$ 6.24a  | 1670.39 $\pm$ 202.61a | 481.58 $\pm$ 137.4a  |
|     | CJ (YC)              | LL                          | 18.40 $\pm$ 4.39a  | 1619.26 $\pm$ 236.13a | 327.26 $\pm$ 105.64a |
|     | DW                   | LL                          | 4.40 $\pm$ 0.31b   | 469.62 $\pm$ 165.7b   | 186.34 $\pm$ 91.33a  |
| 90  | CJ (PJ)              | 0.38 $\pm$ 0.00a            | 14.66 $\pm$ 2.39a  | 1608.27 $\pm$ 165.18a | 1082.93 $\pm$ 69.5a  |
|     | CJ (YC)              | 1.08 $\pm$ 0.48a            | 3.21 $\pm$ 0.93b   | 1632.72 $\pm$ 177.75a | 974.55 $\pm$ 220.84a |
|     | DW                   | 9.37 $\pm$ 4.51a            | 0.99 $\pm$ 0.00ab  | 210.58 $\pm$ 23.1b    | 213.10 $\pm$ 42.63b  |
| 120 | CJ (PJ)              | 3.96 $\pm$ 2.07b            | 15.77 $\pm$ 2.85a  | 1833.89 $\pm$ 310.29a | 502.60 $\pm$ 92.12b  |
|     | CJ (YC)              | 6.64 $\pm$ 2.29b            | 27.31 $\pm$ 11.47a | 2010.03 $\pm$ 267.83a | 869.04 $\pm$ 164.96a |
|     | DW                   | 32.48 $\pm$ 12.41a          | 8.06 $\pm$ 3.22a   | 854.97 $\pm$ 294.55b  | 279.24 $\pm$ 29.72b  |

(B) per plant (unit:  $\mu\text{g/plant}$ )

| Day | Variety <sup>a</sup> | Compound class <sup>b</sup> |                      |                         |                          |
|-----|----------------------|-----------------------------|----------------------|-------------------------|--------------------------|
|     |                      | CM                          | FE                   | FL                      | IS                       |
| 30  | CJ (PJ)              | LL                          | 26.74 $\pm$ 3.52a    | 2397.30 $\pm$ 237.76ab  | 160.97 $\pm$ 4.54b       |
|     | CJ (YC)              | LL                          | 23.36 $\pm$ 3.97a    | 2903.07 $\pm$ 415.67a   | 700.27 $\pm$ 99.84a      |
|     | DW                   | 17.61 $\pm$ 8.01            | 22.15 $\pm$ 3.63a    | 1564.84 $\pm$ 304.17b   | 808.71 $\pm$ 194.5a      |
| 60  | CJ (PJ)              | LL                          | 499.47 $\pm$ 102.37a | 27407.77 $\pm$ 3324.48a | 7901.78 $\pm$ 2254.47a   |
|     | CJ (YC)              | LL                          | 195.28 $\pm$ 46.55b  | 17186.79 $\pm$ 2506.25b | 3473.51 $\pm$ 1121.28ab  |
|     | DW                   | LL                          | 54.30 $\pm$ 3.81b    | 5798.90 $\pm$ 2046.11c  | 2300.97 $\pm$ 1127.74b   |
| 90  | CJ (PJ)              | 7.42 $\pm$ 0.00a            | 289.10 $\pm$ 47.16a  | 31718.30 $\pm$ 3257.67b | 21357.47 $\pm$ 1370.64a  |
|     | CJ (YC)              | 31.44 $\pm$ 13.92a          | 93.73 $\pm$ 26.99b   | 47633.08 $\pm$ 5185.82a | 28431.46 $\pm$ 6442.86a  |
|     | DW                   | 315.29 $\pm$ 151.65a        | 33.26 $\pm$ 0.00b    | 7083.83 $\pm$ 777.16c   | 7168.81 $\pm$ 1434.15b   |
| 120 | CJ (PJ)              | 123.91 $\pm$ 64.81b         | 492.98 $\pm$ 89.26a  | 57338.33 $\pm$ 9701.55a | 15714.14 $\pm$ 2880.15ab |
|     | CJ (YC)              | 170.98 $\pm$ 59.07b         | 703.32 $\pm$ 295.49a | 51766.33 $\pm$ 6897.66a | 22381.13 $\pm$ 4248.35a  |
|     | DW                   | 810.4 $\pm$ 309.57a         | 201.14 $\pm$ 80.21a  | 21329.34 $\pm$ 7348.19b | 6966.22 $\pm$ 741.34b    |

<sup>a</sup> CJ, Cheng-ja soybean variety; DW, Dae-won soybean variety; PJ, Pa-ju city; and YC, Yeon-chencity. <sup>b</sup> CM, coumestrol; FE, flavone; FL, flavonol; and IS, isoflavone. <sup>c</sup> Lower than limit ofquantification. Statistical letter after the numbers was compared within the same cultivation day and compound class using Student's *t*-test for each pair. ( $p < 0.05$ )



Table S3. Content of phenolic compounds in soybean leaves per dry weight.  
(A) day 30 and 60 and (B) day 90 and 120 (unit:  $\mu\text{g/g}$  dry weight).

| (A) |                    | Day 30                                  |                      |                      | 60                   |                     |                      |                     |
|-----|--------------------|-----------------------------------------|----------------------|----------------------|----------------------|---------------------|----------------------|---------------------|
| No. | Class <sup>a</sup> | Compound                                | CJ (PJ) <sup>b</sup> | CJ (YC)              | DW (PJ)              | CJ (PJ)             | CJ (YC)              | DW (PJ)             |
| 1   | FL                 | quercetin 3- <i>O</i> -tri-glycoside A  | 139.01 $\pm$ 10.85ab | 310.38 $\pm$ 162.52a | 2.51 $\pm$ 1.46b     | 638.73 $\pm$ 0.00b  | 749.12 $\pm$ 0.00a   | 3.63 $\pm$ 1.52c    |
| 2   | FL                 | quercetin 3- <i>O</i> -tri-glycoside B  | 45.22 $\pm$ 4.38b    | 299.21 $\pm$ 80.72a  | 0.6 $\pm$ 0.00b      | 256.79 $\pm$ 0.00ab | 431.06 $\pm$ 57.35a  | 0.56 $\pm$ 0.26b    |
| 3   | FL                 | quercetin 3- <i>O</i> -di-glycoside A   | 20.96 $\pm$ 3.29b    | 61.32 $\pm$ 14.18a   | LL <sup>c</sup>      | 438.72 $\pm$ 99.50a | 232.42 $\pm$ 57.25a  | LL                  |
| 4   | FL                 | quercetin 3- <i>O</i> -di-glycoside B   | 13.76 $\pm$ 1.60a    | 59.9 $\pm$ 14.86b    | LL                   | 311.63 $\pm$ 68.08a | 183.61 $\pm$ 43.52a  | LL                  |
| 5   | IS                 | daidzin                                 | LL                   | 16.9 $\pm$ 3.61a     | 9.18 $\pm$ 3.25a     | 20.24 $\pm$ 9.30a   | 12.64 $\pm$ 7.00a    | 15.21 $\pm$ 9.22a   |
| 6   | FL                 | kaempferol 3- <i>O</i> -tri-glycoside A | 784.13 $\pm$ 28.24a  | 241.08 $\pm$ 96.88b  | LL                   | 642.2 $\pm$ 0.00a   | 626.46 $\pm$ 42.70a  | 411.65 $\pm$ 0.00a  |
| 7   | FL                 | kaempferol 3- <i>O</i> -tri-glycoside B | LL                   | 548.7 $\pm$ 73.39    | LL                   | LL                  | LL                   | 380.86 $\pm$ 0.00   |
| 8   | IS                 | glycitin                                | LL                   | LL                   | LL                   | LL                  | LL                   | LL                  |
| 9   | FL                 | kaempferol 3- <i>O</i> -tri-glycoside C | 314.43 $\pm$ 12.58ab | 187.65 $\pm$ 21.44b  | 436.99 $\pm$ 192.84a | 444.18 $\pm$ 0.00a  | 365.73 $\pm$ 68.57a  | 330.71 $\pm$ 96.63a |
| 10  | FL                 | rutin                                   | 10.49 $\pm$ 0.95b    | 65.38 $\pm$ 12.99a   | LL                   | 238.79 $\pm$ 55.65a | 146.91 $\pm$ 38.76ab | 0.69 $\pm$ 0.07b    |
| 11  | FL                 | isoquercitrin                           | 4.42 $\pm$ 0.48b     | 14.86 $\pm$ 3.22a    | LL                   | 42.62 $\pm$ 10.77a  | 25.37 $\pm$ 6.34a    | LL                  |
| 12  | IS                 | genistin                                | 11.02 $\pm$ 0.46c    | 58.23 $\pm$ 8.91a    | 34.91 $\pm$ 8.36b    | 32.4 $\pm$ 11a      | 26.24 $\pm$ 8.35a    | 26.73 $\pm$ 11.93a  |
| 13  | FL                 | kaempferol 3- <i>O</i> -di-glycoside A  | 92.64 $\pm$ 2.76b    | 47.21 $\pm$ 5.19b    | 167.82 $\pm$ 29.65a  | 158.47 $\pm$ 26.28a | 100.92 $\pm$ 25.26a  | 114.69 $\pm$ 22.66a |
| 14  | FL                 | kaempferol 3- <i>O</i> -di-glycoside B  | 52.75 $\pm$ 3.17b    | 29.26 $\pm$ 3.89b    | 125.44 $\pm$ 25.34a  | 73.28 $\pm$ 13.25a  | 57.77 $\pm$ 17.02a   | 60.12 $\pm$ 13.69a  |
| 15  | IS                 | malonyl daidzin                         | 3.3 $\pm$ 0.30b      | 66.62 $\pm$ 12.34a   | 49.09 $\pm$ 14.81a   | 73.92 $\pm$ 33.10a  | 60.93 $\pm$ 29.36a   | 49.27 $\pm$ 28.12a  |
| 16  | IS                 | malonyl glycitin                        | LL                   | 2.21 $\pm$ 0.42a     | 1.11 $\pm$ 0.25a     | 13.59 $\pm$ 3.54a   | 11.81 $\pm$ 2.60a    | 3.43 $\pm$ 0.48a    |
| 17  | FL                 | astragalin                              | 10.86 $\pm$ 0.69ab   | 5.3 $\pm$ 1.82b      | 12.7 $\pm$ 2.47a     | 13.14 $\pm$ 0.98a   | 8.55 $\pm$ 1.92a     | 1.22 $\pm$ 0.29b    |
| 18  | FE                 | apigenin 7- <i>O</i> -glucoside         | LL                   | LL                   | LL                   | LL                  | LL                   | LL                  |
| 19  | IS                 | acetyl daidzin                          | LL                   | LL                   | LL                   | 1.87 $\pm$ 0.35a    | 2.39 $\pm$ 1.13a     | 3.54 $\pm$ 0.80a    |
| 20  | IS                 | acetyl glycitin                         | LL                   | LL                   | LL                   | LL                  | LL                   | LL                  |
| 21  | IS                 | malonyl genistin                        | 23.55 $\pm$ 1.84c    | 239.18 $\pm$ 30.40a  | 119.89 $\pm$ 32.16b  | 256.97 $\pm$ 83.09a | 156.4 $\pm$ 62.51a   | 89.9 $\pm$ 46.41a   |
| 22  | IS                 | daidzein                                | 31.35 $\pm$ 0.81a    | 9.38 $\pm$ 1.30c     | 18.15 $\pm$ 3.02b    | 67.5 $\pm$ 15.51a   | 35.75 $\pm$ 10.03ab  | 11.93 $\pm$ 2.41b   |
| 23  | IS                 | acetyl genistin                         | LL                   | LL                   | LL                   | 0.76 $\pm$ 0.00     | LL                   | LL                  |
| 24  | IS                 | glycitein                               | 4.88 $\pm$ 0.29a     | LL                   | 2.81 $\pm$ 0.00b     | 9.05 $\pm$ 2.54a    | 14.56 $\pm$ 4.69a    | 1.81 $\pm$ 0.00a    |
| 25  | FE                 | luteolin                                | 14.85 $\pm$ 1.96a    | 13.2 $\pm$ 2.24a     | LL                   | 30.22 $\pm$ 6.42a   | 18.4 $\pm$ 4.39a     | LL                  |
| 26  | FL                 | quercetin                               | LL                   | LL                   | LL                   | LL                  | LL                   | LL                  |
| 27  | IS                 | genistein                               | 15.34 $\pm$ 1.37a    | 6.21 $\pm$ 0.36a     | 20.78 $\pm$ 8.47a    | 13.37 $\pm$ 2.36a   | 16.05 $\pm$ 4.29a    | 3.99 $\pm$ 0.42a    |
| 28  | FE                 | apigenin                                | LL                   | LL                   | 6.83 $\pm$ 1.12      | 1.08 $\pm$ 0.00b    | LL                   | 4.4 $\pm$ 0.31a     |
| 29  | CM                 | coumestrol                              | LL                   | LL                   | 5.43 $\pm$ 2.47      | LL                  | LL                   | LL                  |
| 30  | FL                 | kaempferol                              | LL                   | LL                   | LL                   | LL                  | LL                   | LL                  |
| 31  | FL                 | isorhamnetin                            | LL                   | LL                   | LL                   | LL                  | LL                   | LL                  |

to be continued.

| (B) |       | Day 90                                  |                 |                  | 120             |                  |                  |                  |
|-----|-------|-----------------------------------------|-----------------|------------------|-----------------|------------------|------------------|------------------|
| No. | Class | Compound                                | CJ (PJ)         | CJ (YC)          | DW (PJ)         | CJ (PJ)          | CJ (YC)          | DW (PJ)          |
| 1   | FL    | quercetin 3- <i>O</i> -tri-glycoside A  | LL              | 544.88 ± 0.00a   | 3.72 ± 0.92b    | 213.09 ± 0.00b   | 238.81 ± 0.00a   | 2.8 ± 0.60c      |
| 2   | FL    | quercetin 3- <i>O</i> -tri-glycoside B  | LL              | 336.46 ± 110.44a | 0.64 ± 0.33b    | 52.94 ± 0.00a    | 354.38 ± 94.96a  | 1.19 ± 0.69a     |
| 3   | FL    | quercetin 3- <i>O</i> -di-glycoside A   | 537.34 ± 56.03a | 187.94 ± 32.85b  | LL              | 492.1 ± 125.31a  | 313.32 ± 118.90a | LL               |
| 4   | FL    | quercetin 3- <i>O</i> -di-glycoside B   | 391.89 ± 45.99a | 236.67 ± 57.40a  | LL              | 441.13 ± 113.13a | 257.24 ± 86.06a  | LL               |
| 5   | IS    | daidzin                                 | 91.7 ± 6.47a    | 102.83 ± 22.80a  | 6.12 ± 2.46b    | 56.79 ± 14.26a   | 88.94 ± 34.19a   | 17.43 ± 2.90a    |
| 6   | FL    | kaempferol 3- <i>O</i> -tri-glycoside A | LL              | 568.45 ± 254.08  | LL              | 90.74 ± 0.00a    | 547.49 ± 144.14a | 483.92 ± 152.07a |
| 7   | FL    | kaempferol 3- <i>O</i> -tri-glycoside B | LL              | 557.28 ± 0.00    | LL              | 58.07 ± 0.00a    | 113.66 ± 0.00a   | 281.32 ± 120.57a |
| 8   | IS    | glycitin                                | 7.34 ± 0.96a    | 1.88 ± 0.00a     | LL              | 30.18 ± 9.97a    | 16.06 ± 6.74a    | 6.42 ± 1.29a     |
| 9   | FL    | kaempferol 3- <i>O</i> -tri-glycoside C | LL              | 362.85 ± 65.85   | LL              | 452.79 ± 206.64a | 274.19 ± 71.94a  | 158.67 ± 62.82a  |
| 10  | FL    | rutin                                   | 345.33 ± 32.57a | 140.16 ± 26.96b  | LL              | 272.77 ± 69.71a  | 166.29 ± 47.74a  | 0.94 ± 0.00a     |
| 11  | FL    | isoquercitrin                           | 87.56 ± 11.22a  | 29.42 ± 6.20b    | LL              | 114.14 ± 19.18a  | 73.7 ± 32.32a    | LL               |
| 12  | IS    | genistin                                | 80.48 ± 4.50a   | 75.15 ± 15.71a   | 21.56 ± 3.63b   | 54.46 ± 5.83a    | 130.11 ± 51.06a  | 20.93 ± 10.86a   |
| 13  | FL    | kaempferol 3- <i>O</i> -di-glycoside A  | 170.76 ± 12.59a | 58.03 ± 10.14b   | 136.31 ± 12.54a | 95.84 ± 21.96b   | 49.62 ± 13.38b   | 173 ± 27.30a     |
| 14  | FL    | kaempferol 3- <i>O</i> -di-glycoside B  | 63.72 ± 8.02a   | 31.81 ± 5.52b    | 67.77 ± 8.56a   | 48.87 ± 11.26ab  | 32.02 ± 7.56b    | 90.43 ± 33.00a   |
| 15  | IS    | malonyl daidzin                         | 295.22 ± 26.46b | 454.11 ± 92.36a  | 48.33 ± 12.76c  | 47.53 ± 14.13a   | 153.86 ± 62.11a  | 35.87 ± 16.19a   |
| 16  | IS    | malonyl glycitin                        | 61.27 ± 4.15a   | 31.68 ± 7.93b    | 6.19 ± 1.07c    | 33.59 ± 7.23a    | 53.67 ± 19.34a   | 10.76 ± 0.71a    |
| 17  | FL    | astragalin                              | 11.66 ± 2.69a   | 5.72 ± 3.12ab    | 3.16 ± 1.76b    | 14.32 ± 2.02a    | 7.92 ± 3.45a     | 20.4 ± 12.10a    |
| 18  | FE    | apigenin 7- <i>O</i> -glucoside         | LL              | LL               | LL              | LL               | LL               | 6.38 ± 4.74      |
| 19  | IS    | acetyl daidzin                          | 2.89 ± 0.33a    | 3.68 ± 0.79a     | 1.4 ± 0.22a     | LL               | 1.28 ± 0.45a     | 2.84 ± 0.34a     |
| 20  | IS    | acetyl glycitin                         | 0.2 ± 0.00      | 0.22 ± 0.00      | LL              | LL               | LL               | LL               |
| 21  | IS    | malonyl genistin                        | 453.88 ± 24.18a | 470.99 ± 83.37a  | 123.18 ± 21.77b | 61.92 ± 15.45a   | 262.75 ± 146.86a | 57.68 ± 26.59a   |
| 22  | IS    | daidzein                                | 62.72 ± 3.2a    | 19.12 ± 3.98b    | 6.55 ± 1.19c    | 130.12 ± 11.08a  | 152.15 ± 53.04a  | 103.04 ± 21.90a  |
| 23  | IS    | acetyl genistin                         | 1.71 ± 0.59a    | 1.16 ± 0.37a     | LL              | LL               | LL               | LL               |
| 24  | IS    | glycitein                               | 13 ± 0.75a      | 1.28 ± 0.00b     | LL              | 79.87 ± 19.81a   | 36.67 ± 12.89ab  | 27.61 ± 4.32b    |
| 25  | FE    | luteolin                                | 14.66 ± 2.39a   | 3.21 ± 0.93b     | LL              | 15.77 ± 2.85a    | 26.32 ± 10.88a   | LL               |
| 26  | FL    | quercetin                               | LL              | LL               | LL              | 19.16 ± 15.74a   | 73.66 ± 39.59a   | 4.58 ± 1.17a     |
| 27  | IS    | genistein                               | 12.7 ± 1.06a    | 3.17 ± 0.00b     | 3.13 ± 0.00b    | 43.14 ± 2.23a    | 84.37 ± 31.15a   | 44.01 ± 7.99a    |
| 28  | FE    | apigenin                                | LL              | LL               | 0.99 ± 0.00     | LL               | 2.47 ± 0.16a     | 4.87 ± 0.94a     |
| 29  | CM    | coumestrol                              | 0.38 ± 0.00a    | 1.08 ± 0.48a     | 9.37 ± 4.51a    | 3.96 ± 2.07b     | 6.64 ± 2.29b     | 32.48 ± 12.41a   |
| 30  | FL    | kaempferol                              | LL              | LL               | LL              | 22.45 ± 0.00a    | 120.32 ± 53.74a  | 219.53 ± 54.79a  |
| 31  | FL    | isorhamnetin                            | LL              | LL               | LL              | 10.64 ± 0.00     | 15.11 ± 5.39     | LL               |

<sup>a</sup> CM, coumestrol; FE, flavones; FL, flavonols; and IS, isoflavones. <sup>b</sup> CJ, Cheng-ja soybean variety; DW, Dae-won soybean variety; PJ, Pa-ju city; and YC, Yeon-chen city. <sup>c</sup> Lower than limit of quantification. Data are shown as the mean ± standard error of means (n = 1~5). Different letters in the same row of same compound and day indicate significant differences using comparisons of each pair by Student's *t*-test (*p* < 0.05).

Table S4. Content of phenolic compounds in soybean leaves per plant.

(A) day 30 and 60 and (B) day 90 and 120 (unit:  $\mu\text{g/plant}$ )

| (A) | No. | Class <sup>a</sup> | Compound                                | Day 30               |                |                 | 60                |                  |                  |
|-----|-----|--------------------|-----------------------------------------|----------------------|----------------|-----------------|-------------------|------------------|------------------|
|     |     |                    |                                         | CJ (PJ) <sup>b</sup> | CJ (YC)        | DW (PJ)         | CJ (PJ)           | CJ (YC)          | DW (PJ)          |
|     | 1   | FL                 | quercetin 3- <i>O</i> -tri-glycoside A  | 250 $\pm$ 20ab       | 549 $\pm$ 288a | 8 $\pm$ 5b      | 10480 $\pm$ 0.00a | 7951 $\pm$ 0.00b | 45 $\pm$ 19c     |
|     | 2   | FL                 | quercetin 3- <i>O</i> -tri-glycoside B  | 81 $\pm$ 8b          | 530 $\pm$ 143a | 2 $\pm$ 0.00b   | 4213 $\pm$ 0.00a  | 4575 $\pm$ 609a  | 7 $\pm$ 3b       |
|     | 3   | FL                 | quercetin 3- <i>O</i> -di-glycoside A   | 38 $\pm$ 6b          | 109 $\pm$ 25a  | LL              | 7198 $\pm$ 1633a  | 2467 $\pm$ 608b  | LL               |
|     | 4   | FL                 | quercetin 3- <i>O</i> -di-glycoside B   | 25 $\pm$ 3b          | 106 $\pm$ 26a  | LL              | 5113 $\pm$ 1117a  | 1949 $\pm$ 462b  | LL               |
|     | 5   | IS                 | daidzin                                 | LL                   | 30 $\pm$ 6a    | 30 $\pm$ 11a    | 332 $\pm$ 153a    | 134 $\pm$ 74a    | 188 $\pm$ 114a   |
|     | 6   | FL                 | kaempferol 3- <i>O</i> -tri-glycoside A | 1411 $\pm$ 51a       | 427 $\pm$ 171b | LL              | 10537 $\pm$ 0.00a | 6649 $\pm$ 453a  | 5083 $\pm$ 0.00a |
|     | 7   | FL                 | kaempferol 3- <i>O</i> -tri-glycoside B | LL                   | 971 $\pm$ 130  | LL              | LL                | LL               | 4703 $\pm$ 0.00  |
|     | 8   | IS                 | glycitin                                | LL                   | LL             | LL              | LL                | LL               | LL               |
|     | 9   | FL                 | kaempferol 3- <i>O</i> -tri-glycoside C | 566 $\pm$ 23b        | 332 $\pm$ 38b  | 1418 $\pm$ 626a | 7288 $\pm$ 0.00a  | 3882 $\pm$ 728a  | 4084 $\pm$ 1193a |
|     | 10  | FL                 | rutin                                   | 19 $\pm$ 2b          | 116 $\pm$ 23a  | LL              | 3918 $\pm$ 913a   | 1559 $\pm$ 411b  | 9 $\pm$ 1b       |
|     | 11  | FL                 | isoquercitrin                           | 8 $\pm$ 1b           | 26 $\pm$ 6a    | LL              | 699 $\pm$ 177a    | 269 $\pm$ 67a    | LL               |
|     | 12  | IS                 | genistin                                | 20 $\pm$ 1b          | 103 $\pm$ 16a  | 113 $\pm$ 27a   | 532 $\pm$ 181a    | 279 $\pm$ 89a    | 330 $\pm$ 147a   |
|     | 13  | FL                 | kaempferol 3- <i>O</i> -di-glycoside A  | 167 $\pm$ 5b         | 84 $\pm$ 9b    | 544 $\pm$ 96a   | 2600 $\pm$ 431a   | 1071 $\pm$ 268b  | 1416 $\pm$ 280b  |
|     | 14  | FL                 | kaempferol 3- <i>O</i> -di-glycoside B  | 95 $\pm$ 6b          | 52 $\pm$ 7b    | 407 $\pm$ 82a   | 1202 $\pm$ 217a   | 613 $\pm$ 181b   | 742 $\pm$ 169ab  |
|     | 15  | IS                 | malonyl daidzin                         | 6 $\pm$ 1b           | 118 $\pm$ 22a  | 159 $\pm$ 48a   | 1213 $\pm$ 543a   | 647 $\pm$ 312a   | 608 $\pm$ 347a   |
|     | 16  | IS                 | malonyl glycitin                        | LL                   | 4 $\pm$ 1a     | 4 $\pm$ 1a      | 223 $\pm$ 58a     | 125 $\pm$ 28a    | 42 $\pm$ 6a      |
|     | 17  | FL                 | astragalin                              | 20 $\pm$ 1b          | 9 $\pm$ 3b     | 41 $\pm$ 8a     | 216 $\pm$ 16a     | 91 $\pm$ 20b     | 15 $\pm$ 4c      |
|     | 18  | FE                 | apigenin 7- <i>O</i> -glucoside         | LL                   | LL             | LL              | LL                | LL               | LL               |
|     | 19  | IS                 | acetyl daidzin                          | LL                   | LL             | LL              | 31 $\pm$ 6a       | 25 $\pm$ 12a     | 44 $\pm$ 10a     |
|     | 20  | IS                 | acetyl glycitin                         | LL                   | LL             | LL              | LL                | LL               | LL               |
|     | 21  | IS                 | malonyl genistin                        | 42 $\pm$ 3b          | 423 $\pm$ 54a  | 389 $\pm$ 104a  | 4216 $\pm$ 1363a  | 1660 $\pm$ 664ab | 1110 $\pm$ 573b  |
|     | 22  | IS                 | daidzein                                | 56 $\pm$ 1a          | 17 $\pm$ 2b    | 59 $\pm$ 10a    | 1107 $\pm$ 254a   | 379 $\pm$ 106b   | 147 $\pm$ 30b    |
|     | 23  | IS                 | acetyl genistin                         | LL                   | LL             | LL              | 13 $\pm$ 0.00     | LL               | LL               |
|     | 24  | IS                 | glycitein                               | 9 $\pm$ 1a           | LL             | 9 $\pm$ 0.00a   | 148 $\pm$ 42a     | 155 $\pm$ 50a    | 22 $\pm$ 0.00a   |
|     | 25  | FE                 | luteolin                                | 27 $\pm$ 4a          | 23 $\pm$ 4a    | LL              | 496 $\pm$ 105a    | 195 $\pm$ 47b    | LL               |
|     | 26  | FL                 | quercetin                               | LL                   | LL             | LL              | LL                | LL               | LL               |
|     | 27  | IS                 | genistein                               | 28 $\pm$ 2a          | 11 $\pm$ 1a    | 67 $\pm$ 27a    | 219 $\pm$ 39a     | 170 $\pm$ 46ab   | 49 $\pm$ 5b      |
|     | 28  | FE                 | apigenin                                | LL                   | LL             | 22 $\pm$ 4      | 18 $\pm$ 0.00b    | LL               | 54 $\pm$ 4a      |
|     | 29  | CM                 | coumestrol                              | LL                   | LL             | 18 $\pm$ 8      | LL                | LL               | LL               |
|     | 30  | FL                 | kaempferol                              | LL                   | LL             | LL              | LL                | LL               | LL               |
|     | 31  | FL                 | isorhamnetin                            | LL                   | LL             | LL              | LL                | LL               | LL               |

to be continued.

| (B) |       |                                         | Day 90        |               |             | 120           |               |               |
|-----|-------|-----------------------------------------|---------------|---------------|-------------|---------------|---------------|---------------|
| No. | Class | Compound                                | CJ (PJ)       | CJ (YC)       | DW (PJ)     | CJ (PJ)       | CJ (YC)       | DW (PJ)       |
| 1   | FL    | quercetin 3- <i>O</i> -tri-glycoside A  | LL            | 15896 ± 0.00a | 125 ± 31b   | 6663 ± 0.00a  | 6150 ± 0.00b  | 70 ± 15c      |
| 2   | FL    | quercetin 3- <i>O</i> -tri-glycoside B  | LL            | 9816 ± 3222a  | 21 ± 11b    | 1655 ± 0.00a  | 9127 ± 2446a  | 30 ± 17a      |
| 3   | FL    | quercetin 3- <i>O</i> -di-glycoside A   | 10597 ± 1105a | 5483 ± 958b   | LL          | 15386 ± 3918a | 8069 ± 3062a  | LL            |
| 4   | FL    | quercetin 3- <i>O</i> -di-glycoside B   | 7729 ± 907a   | 6905 ± 1675a  | LL          | 13792 ± 3537a | 6625 ± 2216a  | LL            |
| 5   | IS    | daidzin                                 | 1808 ± 128a   | 3000 ± 665a   | 206 ± 83b   | 1775 ± 446a   | 2290 ± 880a   | 435 ± 72a     |
| 6   | FL    | kaempferol 3- <i>O</i> -tri-glycoside A | LL            | 16584 ± 7413  | LL          | 2837 ± 0.00a  | 14100 ± 3712a | 12073 ± 3794a |
| 7   | FL    | kaempferol 3- <i>O</i> -tri-glycoside B | LL            | 16258 ± 0.00  | LL          | 1816 ± 0.00a  | 2927 ± 0.00a  | 7018 ± 3008a  |
| 8   | IS    | glycitin                                | 145 ± 19a     | 55 ± 0.00a    | LL          | 944 ± 312a    | 414 ± 174a    | 160 ± 32a     |
| 9   | FL    | kaempferol 3- <i>O</i> -tri-glycoside C | LL            | 10586 ± 1921  | LL          | 14157 ± 6461a | 7061 ± 1853a  | 3958 ± 1567a  |
| 10  | FL    | rutin                                   | 6811 ± 642a   | 4089 ± 786b   | LL          | 8528 ± 2179a  | 4283 ± 1230a  | 23 ± 0.00a    |
| 11  | FL    | isoquercitrin                           | 1727 ± 221a   | 858 ± 181b    | LL          | 3569 ± 600a   | 1898 ± 832a   | LL            |
| 12  | IS    | genistin                                | 1587 ± 89a    | 2193 ± 458a   | 725 ± 122b  | 1703 ± 182a   | 3351 ± 1315a  | 522 ± 271a    |
| 13  | FL    | kaempferol 3- <i>O</i> -di-glycoside A  | 3368 ± 248b   | 1693 ± 296c   | 4585 ± 422a | 2996 ± 687ab  | 1278 ± 344b   | 4316 ± 681a   |
| 14  | FL    | kaempferol 3- <i>O</i> -di-glycoside B  | 1257 ± 158b   | 928 ± 161b    | 2280 ± 288a | 1528 ± 352a   | 825 ± 195a    | 2256 ± 823a   |
| 15  | IS    | malonyl daidzin                         | 5822 ± 522b   | 13248 ± 2694a | 1626 ± 429c | 1486 ± 442a   | 3962 ± 1599a  | 895 ± 404a    |
| 16  | IS    | malonyl glycitin                        | 1208 ± 82a    | 924 ± 231a    | 208 ± 36b   | 1050 ± 226a   | 1382 ± 498a   | 268 ± 18a     |
| 17  | FL    | astragalin                              | 230 ± 53a     | 167 ± 91a     | 106 ± 59a   | 448 ± 63a     | 204 ± 89a     | 509 ± 302a    |
| 18  | FE    | apigenin 7- <i>O</i> -glucoside         | LL            | LL            | LL          | LL            | LL            | 159 ± 118     |
| 19  | IS    | acetyl daidzin                          | 57 ± 6a       | 107 ± 23a     | 47 ± 7a     | LL            | 33 ± 12a      | 71 ± 8a       |
| 20  | IS    | acetyl glycitin                         | 4 ± 0.00      | 6 ± 0.00      | LL          | LL            | LL            | LL            |
| 21  | IS    | malonyl genistin                        | 8951 ± 477b   | 13741 ± 2432a | 4144 ± 732c | 1936 ± 483a   | 6767 ± 3782a  | 1439 ± 663a   |
| 22  | IS    | daidzein                                | 1237 ± 63a    | 558 ± 116b    | 220 ± 40c   | 4068 ± 346a   | 3918 ± 1366a  | 2571 ± 546a   |
| 23  | IS    | acetyl genistin                         | 34 ± 12a      | 34 ± 11a      | LL          | LL            | LL            | LL            |
| 24  | IS    | glycitein                               | 256 ± 15a     | 37 ± 0.00b    | LL          | 2497 ± 619a   | 944 ± 332b    | 689 ± 108b    |
| 25  | FE    | luteolin                                | 289 ± 47a     | 94 ± 27b      | LL          | 493 ± 89a     | 678 ± 280a    | LL            |
| 26  | FL    | quercetin                               | LL            | LL            | LL          | 599 ± 492a    | 1897 ± 1020a  | 114 ± 29a     |
| 27  | IS    | genistein                               | 250 ± 21a     | 92 ± 0.00b    | 105 ± 0.00b | 1349 ± 70a    | 2173 ± 802a   | 1098 ± 199a   |
| 28  | FE    | apigenin                                | LL            | LL            | 33 ± 0.00   | LL            | 64 ± 4a       | 122 ± 24a     |
| 29  | CM    | coumestrol                              | 7 ± 0.00a     | 31 ± 14a      | 315 ± 152a  | 124 ± 65b     | 171 ± 59b     | 810 ± 310a    |
| 30  | FL    | kaempferol                              | LL            | LL            | LL          | 702 ± 0.00a   | 3099 ± 1384a  | 5477 ± 1367a  |
| 31  | FL    | isorhamnetin                            | LL            | LL            | LL          | 333 ± 0.00    | 389 ± 139     | LL            |

<sup>a</sup> CM, coumestrol; FE, flavones; FL, flavonols; and IS, isoflavones. <sup>b</sup> CJ, Cheng-ja soybean variety; DW, Dae-won soybean variety; PJ, Pa-ju city; and YC, Yeon-chen city. <sup>c</sup> Lower than limit of quantification. Data are shown as the mean ± standard error of means (n = 1~5). Different letters in the same row of same compound and day indicate significant differences using comparisons of each pair by Student's *t*-test (*p* < 0.05).

Table S5. Summary of machine learning models.

## (A) Summary of established models using SIMCA

| Model <sup>a</sup> | Comparison class of the dataset | Number of components (NC) | Number of observation in the model | R <sup>2</sup> X(cum) <sub>b</sub> | R <sup>2</sup> Y(cum) <sub>c</sub> | Q <sup>2</sup> (cum) <sub>d</sub> |
|--------------------|---------------------------------|---------------------------|------------------------------------|------------------------------------|------------------------------------|-----------------------------------|
| OPLS               | All                             | 1+6+0                     | 57                                 | 0.812                              | 0.783                              | 0.638                             |
| OPLS-DA            | Variety                         | 1+2+0                     | 56                                 | 0.602                              | 0.798                              | 0.729                             |
|                    | City                            | 1+1+0                     | 39                                 | 0.664                              | 0.449                              | 0.406                             |

<sup>a</sup> OPLS, orthogonal partial-least squares; OPLS-DA; orthogonal partial-least squares discriminant analysis. <sup>b</sup> Cumulative X-variation modeled after NC. <sup>c</sup> Cumulative Y-variation modeled after NC (OPLS). <sup>d</sup> Cumulative overall cross-validated R<sup>2</sup>X for a PC model; R<sup>2</sup>Y for a OPLS model.

## (B) Misclassification table of OPLS-DA to discriminate variety

|                      | Members                | Correct | CJ | DW | No class ( $Y_{\text{Pred}} \leq 0$ ) |
|----------------------|------------------------|---------|----|----|---------------------------------------|
| CJ <sup>a</sup>      | 39                     | 100.00% | 39 | 0  | 0                                     |
| DW <sup>b</sup>      | 19                     | 100.00% | 0  | 19 | 0                                     |
| No class             | 0                      |         | 0  | 0  | 0                                     |
| Total                | 58                     | 100.00% | 39 | 19 | 0                                     |
| Fisher's probability | 1.10×10 <sup>-15</sup> |         |    |    |                                       |

<sup>a</sup> CJ: Cheng-ja soybean variety. <sup>b</sup> DW: Dae-won soybean variety.

## (C) Misclassification table of OPLS-DA to discriminate city

|                      | Members               | Correct | YC | PJ | No class ( $Y_{\text{Pred}} \leq 0$ ) |
|----------------------|-----------------------|---------|----|----|---------------------------------------|
| YC <sup>a</sup>      | 19                    | 84.21%  | 16 | 3  | 0                                     |
| PJ <sup>b</sup>      | 20                    | 85.00%  | 3  | 17 | 0                                     |
| No class             | 0                     |         | 0  | 0  | 0                                     |
| Total                | 39                    | 84.62%  | 19 | 20 | 0                                     |
| Fisher's probability | 1.70×10 <sup>-5</sup> |         |    |    |                                       |

<sup>a</sup> PJ: Pa-ju city. <sup>b</sup> YC: Yeon-chen city.

## (D) Summary of machine learning models using JMP pro

| Model <sup>a</sup> | Class of dataset | Number of layers or trees | Generalized R <sup>2</sup> <sup>b</sup> |            |       | Misclassification rate |            |      |
|--------------------|------------------|---------------------------|-----------------------------------------|------------|-------|------------------------|------------|------|
|                    |                  |                           | training                                | validation | test  | training               | validation | test |
| NU                 | variety          | 3+10                      | 0.981                                   | 0.950      | 0.936 | 0                      | 0          | 0    |
|                    | day              | 3+6                       | 0.999                                   | 0.986      | 0.960 | 0                      | 0          | 0.09 |
|                    | city             | 3+2                       | 0.999                                   | 0.998      | 0.991 | 0                      | 0          | 0    |
| BF                 | day              | 5                         | 0.809                                   | 0.537      | 0.806 | 0.09                   | 0.17       | 0.18 |
| BT                 | variety          | 50                        | 0.999                                   | 0.999      | 0.999 | 0                      | 0          | 0    |
|                    | city             | 50                        | 0.989                                   | 0.943      | NA    | 0                      | 0          | NA   |

<sup>a</sup> NU, neural; BF, bootstrap forest; and BT, boosted tree. <sup>b</sup> Generalized R<sup>2</sup> measure simplifies to the traditional R<sup>2</sup> for continuous normal responses in the standard least squares setting. Generalized R<sup>2</sup> is also known as the Nagelkerke or Craig and Uhler R<sup>2</sup>, which is a normalized version of Cox and Snell's pseudo R<sup>2</sup>.

Table S6. Key compounds obtained using cut-off criteria of S-plot (SIMCA)

| Model <sup>a</sup> | Class of discrimination | Compound                               | p[1] <sup>b</sup> | p( <sub>corr</sub> )[1] <sup>c</sup> |
|--------------------|-------------------------|----------------------------------------|-------------------|--------------------------------------|
| OPLS               | Day                     | daidzein                               | 0.345             | 0.636                                |
|                    |                         | genistein                              | 0.203             | 0.512                                |
|                    |                         | glycitein                              | 0.217             | 0.696                                |
|                    |                         | glycitin                               | 0.110             | 0.592                                |
|                    |                         | malonyl glycitin                       | 0.174             | 0.512                                |
| OPLS-DA            | Variety                 | apigenin                               | 0.049             | 0.656                                |
|                    |                         | isoquercitrin                          | −0.200            | −0.661                               |
|                    |                         | kaempferol 3- <i>O</i> -di-glycoside B | 0.145             | 0.501                                |
|                    |                         | luteolin                               | −0.095            | −0.556                               |
|                    |                         | malonyl glycitin                       | −0.114            | −0.506                               |
|                    |                         | quercetin 3- <i>O</i> -di-glycoside A  | −0.500            | −0.688                               |
|                    |                         | quercetin 3- <i>O</i> -di-glycoside B  | −0.457            | −0.705                               |
|                    |                         | rutin                                  | −0.386            | −0.703                               |
| OPLS-DA            | City                    | astragalin                             | 0.060             | 0.596                                |
|                    |                         | kaempferol 3- <i>O</i> -di-glycoside A | 0.221             | 0.633                                |
|                    |                         | kaempferol 3- <i>O</i> -di-glycoside B | 0.161             | 0.699                                |
|                    |                         | malonyl daidzin                        | −0.290            | −0.519                               |
|                    |                         | quercetin 3- <i>O</i> -tri-glycoside A | −0.340            | −0.597                               |
|                    |                         | quercetin 3- <i>O</i> -tri-glycoside B | −0.448            | −0.705                               |

<sup>a</sup> OPLS, orthogonal partial-least squares; and OPLS-DA, orthogonal partial-least squares discriminant analysis. <sup>b</sup> Modeled covariation. <sup>c</sup> Correlation coefficient.

Table S7. Key compounds obtained using cut-off criteria of VIP (SIMCA)

| Model <sup>a</sup> | Class of discrimination | Compound                                | VIP <sup>b</sup> |
|--------------------|-------------------------|-----------------------------------------|------------------|
| OPLS               | Day                     | quercetin 3- <i>O</i> -di-glycoside A   | 2.08             |
|                    |                         | quercetin 3- <i>O</i> -di-glycoside B   | 1.94             |
|                    |                         | rutin                                   | 1.57             |
|                    |                         | kaempferol 3- <i>O</i> -tri-glycoside A | 1.52             |
|                    |                         | daidzein                                | 1.51             |
|                    |                         | malonyl daidzin                         | 1.35             |
|                    |                         | quercetin 3- <i>O</i> -tri-glycoside A  | 1.31             |
|                    |                         | kaempferol 3- <i>O</i> -tri-glycoside C | 1.25             |
|                    |                         | malonyl genistin                        | 1.25             |
|                    |                         | daidzin                                 | 1.01             |
|                    |                         | quercetin 3- <i>O</i> -tri-glycoside B  | 1.00             |
|                    |                         | kaempferol                              | 0.97             |
|                    |                         | isoquercitrin                           | 0.95             |
|                    |                         | glycitein                               | 0.93             |
|                    |                         | genistein                               | 0.93             |
|                    |                         | kaempferol 3- <i>O</i> -tri-glycoside B | 0.81             |
| OPLS-DA            | Variety                 | quercetin 3- <i>O</i> -di-glycoside A   | 2.31             |
|                    |                         | quercetin 3- <i>O</i> -di-glycoside B   | 2.07             |
|                    |                         | rutin                                   | 1.77             |
|                    |                         | kaempferol 3- <i>O</i> -tri-glycoside A | 1.54             |
|                    |                         | malonyl genistin                        | 1.20             |
|                    |                         | quercetin 3- <i>O</i> -tri-glycoside B  | 1.15             |
|                    |                         | malonyl daidzin                         | 1.08             |
|                    |                         | kaempferol 3- <i>O</i> -tri-glycoside C | 1.04             |
|                    |                         | quercetin 3- <i>O</i> -tri-glycoside A  | 1.02             |
|                    |                         | isoquercitrin                           | 0.92             |
|                    |                         | kaempferol 3- <i>O</i> -di-glycoside A  | 0.81             |
| OPLS-DA            | City                    | quercetin 3- <i>O</i> -tri-glycoside B  | 1.88             |
|                    |                         | quercetin 3- <i>O</i> -di-glycoside A   | 1.82             |
|                    |                         | kaempferol 3- <i>O</i> -tri-glycoside C | 1.74             |
|                    |                         | quercetin 3- <i>O</i> -di-glycoside B   | 1.56             |
|                    |                         | malonyl genistin                        | 1.56             |
|                    |                         | malonyl daidzin                         | 1.41             |
|                    |                         | quercetin 3- <i>O</i> -tri-glycoside A  | 1.37             |
|                    |                         | rutin                                   | 1.31             |
|                    |                         | kaempferol 3- <i>O</i> -tri-glycoside A | 1.10             |
|                    |                         | kaempferol 3- <i>O</i> -di-glycoside A  | 0.94             |

<sup>a</sup> OPLS, orthogonal partial-least squares; and OPLS-DA, orthogonal partial-least squares discriminant analysis. <sup>b</sup> Variable importance projection.

Table S8. Key compounds obtained using cut-off criteria of machine learning (JMP pro).

| Model <sup>a</sup> | Class of discrimination | Compound                                | Number of splits | G <sup>2</sup> <sup>b</sup> | Portion <sup>c</sup> |
|--------------------|-------------------------|-----------------------------------------|------------------|-----------------------------|----------------------|
| BF                 | Day                     | glycitein                               | 3                | 7.96                        | 0.22                 |
|                    |                         | malonyl glycitin                        | 2                | 6.05                        | 0.17                 |
|                    |                         | daidzein                                | 2                | 5.00                        | 0.14                 |
|                    |                         | genistein                               | 1                | 4.82                        | 0.13                 |
|                    |                         | acetyl daidzin                          | 2                | 2.90                        | 0.08                 |
|                    |                         | quercetin                               | 2                | 2.56                        | 0.07                 |
|                    |                         | luteolin                                | 1                | 2.49                        | 0.07                 |
|                    |                         | astragalin                              | 1                | 2.13                        | 0.06                 |
| BT                 | Variety                 | luteolin                                | 22               | 959.18                      | 0.44                 |
|                    |                         | quercetin 3- <i>O</i> -tri-glycoside A  | 26               | 593.46                      | 0.27                 |
|                    |                         | apigenin                                | 28               | 581.90                      | 0.27                 |
| BT                 | City                    | acetyl daidzin                          | 22               | 271.97                      | 0.12                 |
|                    |                         | kaempferol 3- <i>O</i> -tri-glycoside A | 12               | 269.72                      | 0.12                 |
|                    |                         | kaempferol 3- <i>O</i> -di-glycoside A  | 14               | 258.71                      | 0.12                 |
|                    |                         | kaempferol 3- <i>O</i> -tri-glycoside C | 11               | 235.14                      | 0.11                 |
|                    |                         | glycitein                               | 11               | 216.02                      | 0.10                 |
|                    |                         | quercetin 3- <i>O</i> -tri-glycoside B  | 12               | 183.69                      | 0.08                 |
|                    |                         | malonyl genistin                        | 9                | 163.67                      | 0.08                 |
|                    |                         | luteolin                                | 8                | 160.02                      | 0.07                 |
|                    |                         | genistein                               | 7                | 154.98                      | 0.07                 |
|                    |                         | quercetin 3- <i>O</i> -di-glycoside B   | 6                | 105.74                      | 0.05                 |

<sup>a</sup> BF, bootstrap forest; and BT, boosted tree. <sup>b</sup> Likelihood ratio chi-square. <sup>c</sup> The portion is given among the compounds which have G<sup>2</sup> value according to the result of machine learning modeling.



Table S9. Example of prediction results executed by Python code.

| No. | Day      |                           |                       | Variety  |              |                       | City     |              |          |
|-----|----------|---------------------------|-----------------------|----------|--------------|-----------------------|----------|--------------|----------|
|     | original | pred. Neural <sup>a</sup> | pred. BF <sup>b</sup> | original | pred. Neural | pred. BT <sup>c</sup> | original | pred. Neural | pred. BT |
| 0   | 30       | 30                        | 30                    | CJ       | CJ           | CJ                    | YC       | YC           | YC       |
| 1   | 30       | 30                        | 60*                   | CJ       | CJ           | CJ                    | YC       | YC           | YC       |
| 2   | 90       | 90                        | 90                    | CJ       | CJ           | CJ                    | YC       | YC           | YC       |
| 3   | 30       | 60*                       | 30                    | DW       | DW           | DW                    | PJ       | PJ           | PJ       |
| 4   | 90       | 90                        | 60*                   | DW       | DW           | DW                    | PJ       | PJ           | PJ       |
| 5   | 30       | 30                        | 30                    | CJ       | CJ           | CJ                    | PJ       | PJ           | PJ       |
| 6   | 30       | 30                        | 30                    | CJ       | CJ           | CJ                    | PJ       | PJ           | PJ       |
| 7   | 30       | 30                        | 30                    | CJ       | CJ           | CJ                    | PJ       | PJ           | PJ       |
| 8   | 60       | 60                        | 60                    | CJ       | CJ           | CJ                    | PJ       | PJ           | PJ       |
| 9   | 60       | 60                        | 60                    | CJ       | CJ           | CJ                    | PJ       | PJ           | PJ       |
| 10  | 120      | 120                       | 120                   | CJ       | CJ           | CJ                    | PJ       | PJ           | PJ       |

<sup>a</sup> Prediction of neural model<sup>b</sup> Prediction of bootstrap forest model<sup>c</sup> Prediction of boosted tree model.

\* Misclassified prediction results

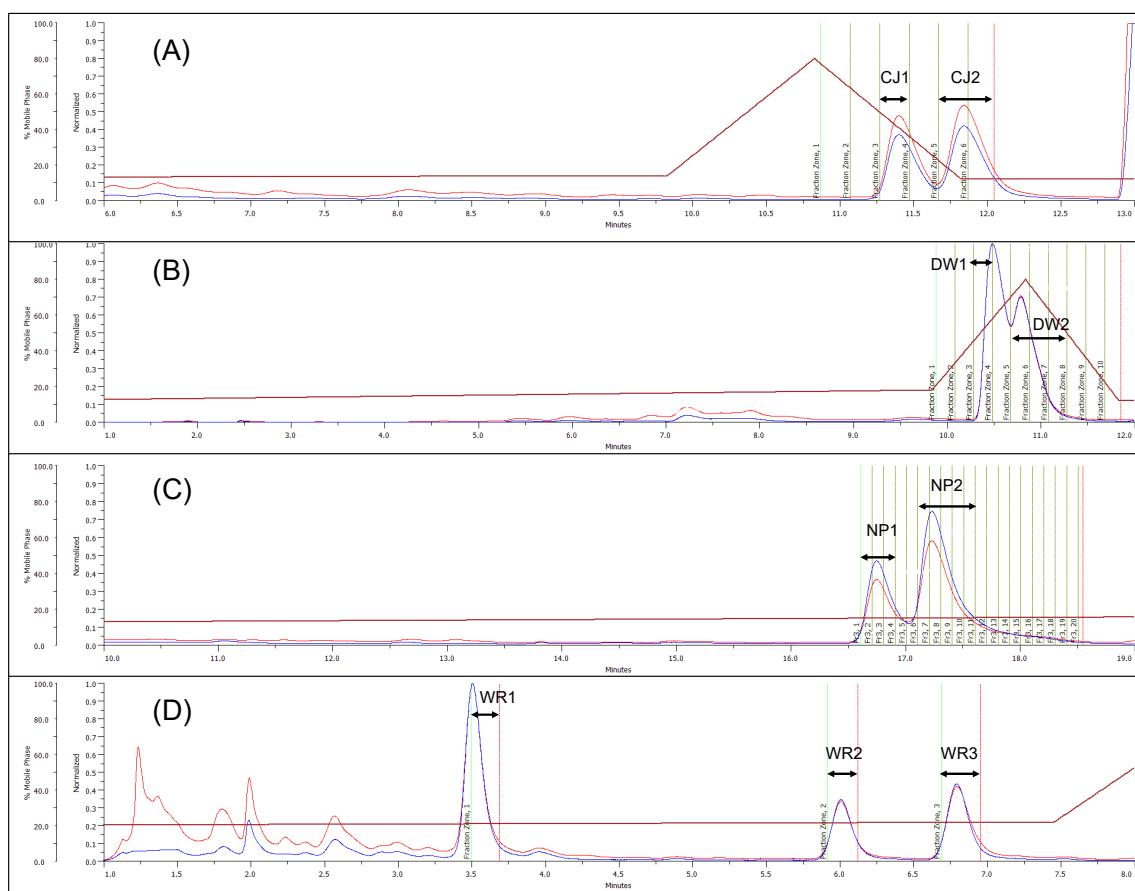

Figure S1. Preparative HPLC chromatograms for the purified compounds of soybean leaves.

Preparative separation of (A) two compounds from soybean leaf (SL) of CJ variety, (B) two compounds from SL of DW variety, (C) two compounds from SL of NP variety, (D) three compounds from SL of CJ variety. Horizontal two-way arrows are indicating the collected fraction for the named peaks; red peak lines, 245 nm; blue peak lines, 365 nm; red bold lines, mobile phase B%. Elution programs (min–B%): (A) 0–12, 10–14, 11–80, 12–12, and 16–12, (B) 0–12, 10–18, 11–80, 12–12, and 16–12, (C) 0–10, 20–16, 21–80, 22–10, and 27–10, and (D) 0–20, 8–22, 9–80, 10–20, and 14–20.

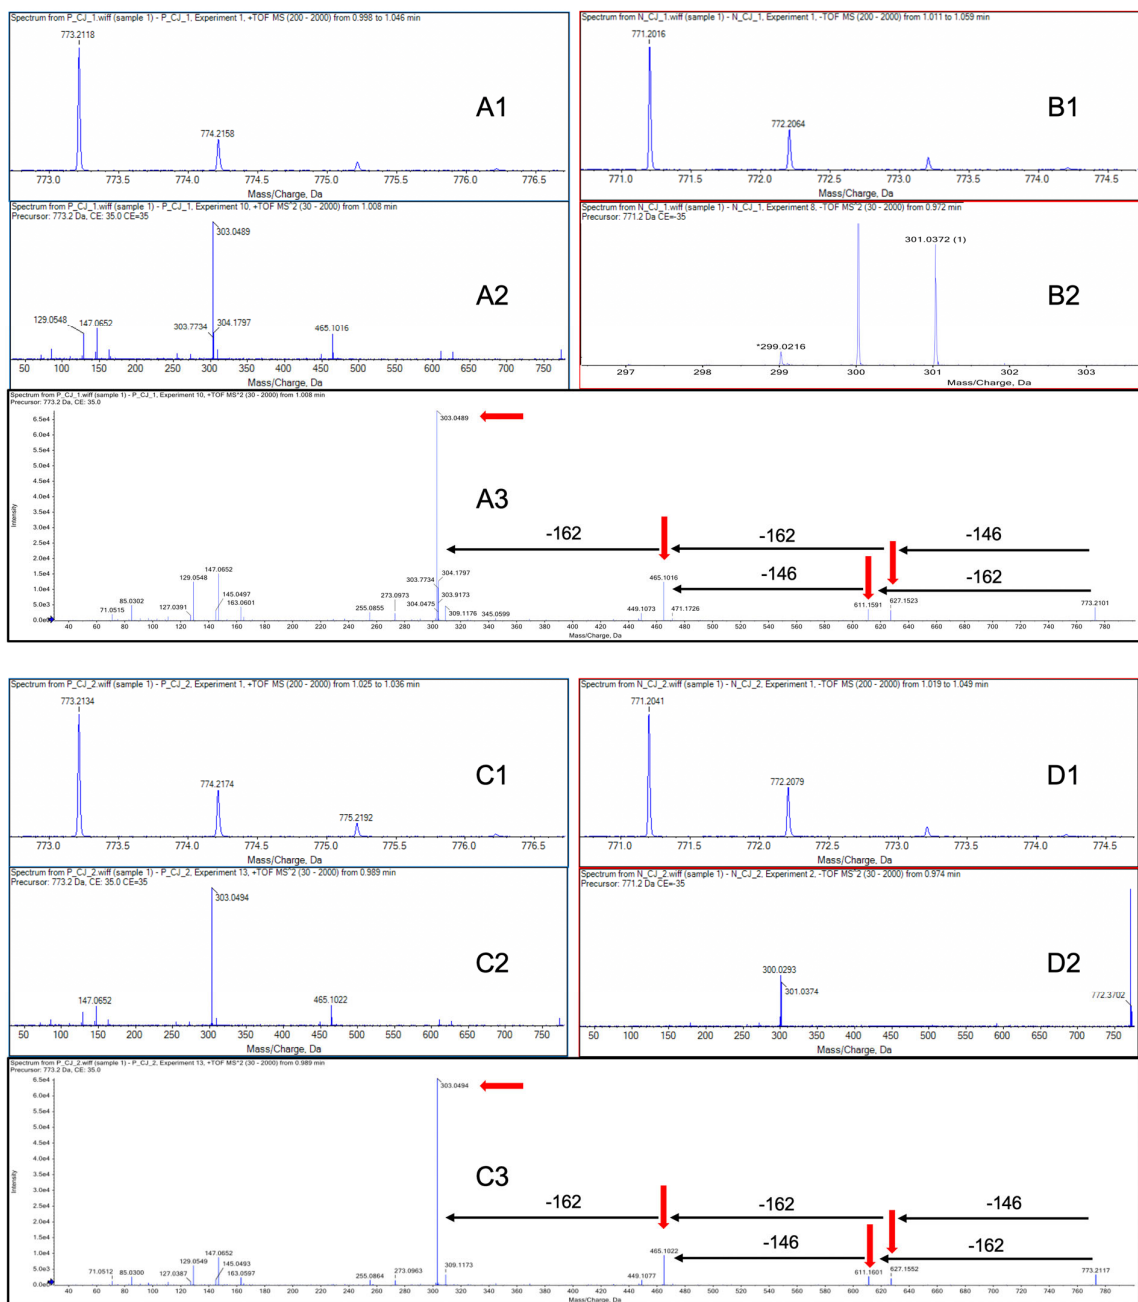

Figure S2. Mass spectra of precursors and fragments of purified compounds from CJ.

A1, precursor of CJ1 compound at positive mode; A2, fragment of CJ1 compound at positive mode; A3, detailed fragment of CJ1 at positive mode; B1, precursor of CJ1 compound at negative mode; B2, fragment of CJ1 compound at negative mode; C1, precursor of CJ2 compound at positive mode; C2, fragment of CJ2 compound at positive mode; C3, detailed fragment of CJ2 at positive mode; D1, precursor of CJ2 compound at negative mode; and D2, fragment of CJ2 compound at negative mode.

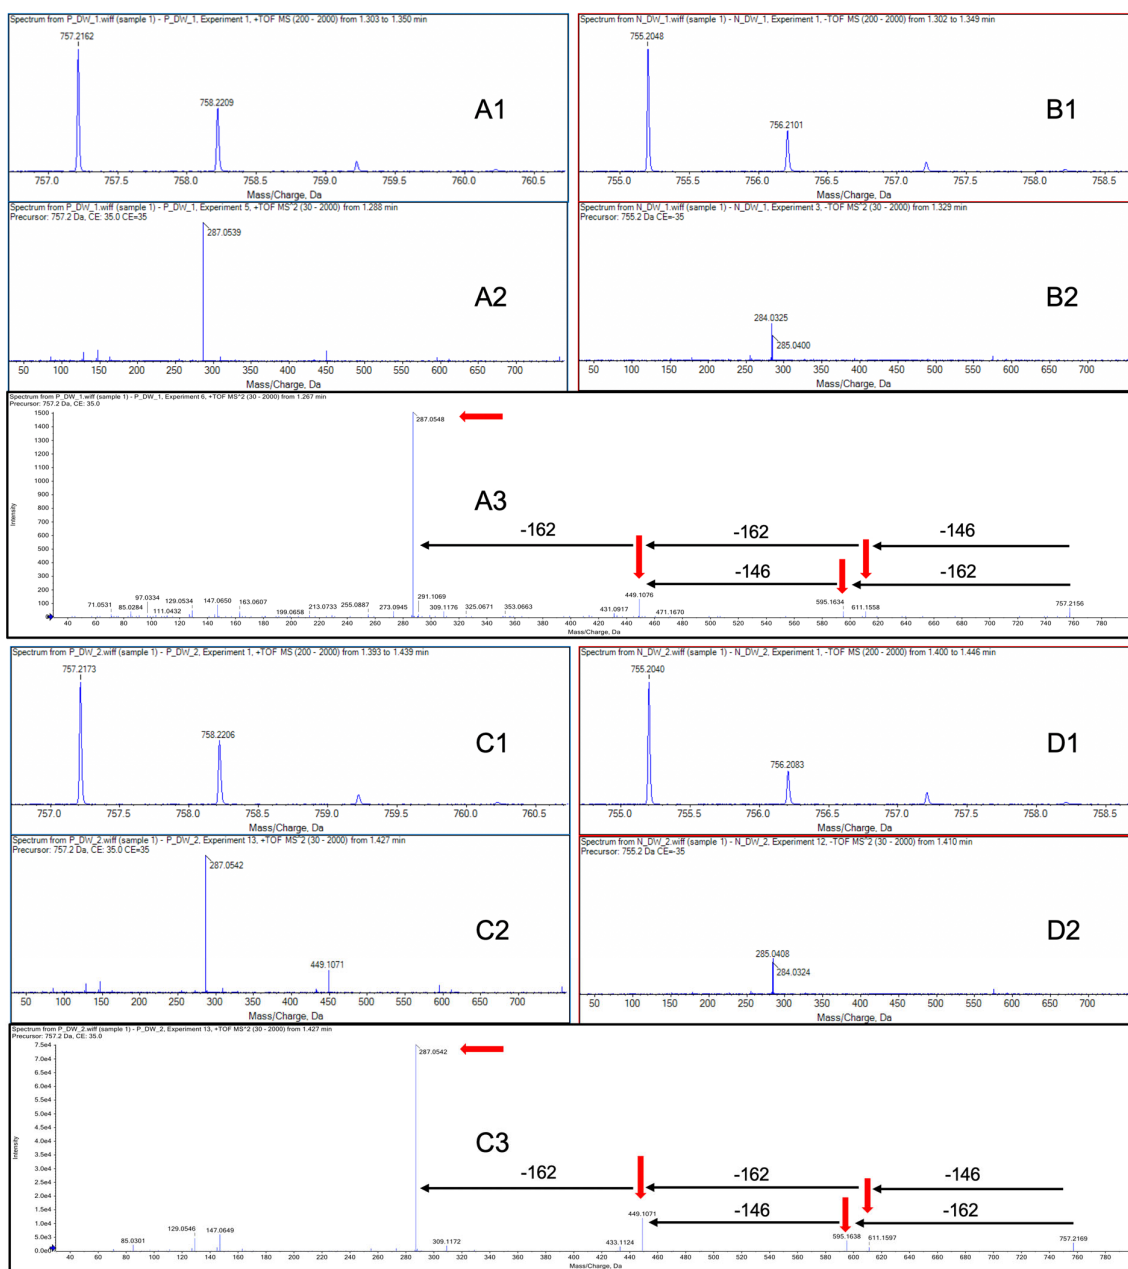

Figure S3. Mass spectra of precursors and fragments of purified compounds from DW.

A1, precursor of DW1 compound at positive mode; A2, fragment of DW1 compound at positive mode; A3, detailed fragment of DW1 at positive mode; B1, precursor of DW1 compound at negative mode; B2, fragment of DW1 compound at negative mode; C1, precursor of DW2 compound at positive mode; C2, fragment of DW2 compound at positive mode; C3, detailed fragment of DW2 at positive mode; D1, precursor of DW2 compound at negative mode; and D2, fragment of DW2 compound at negative mode.

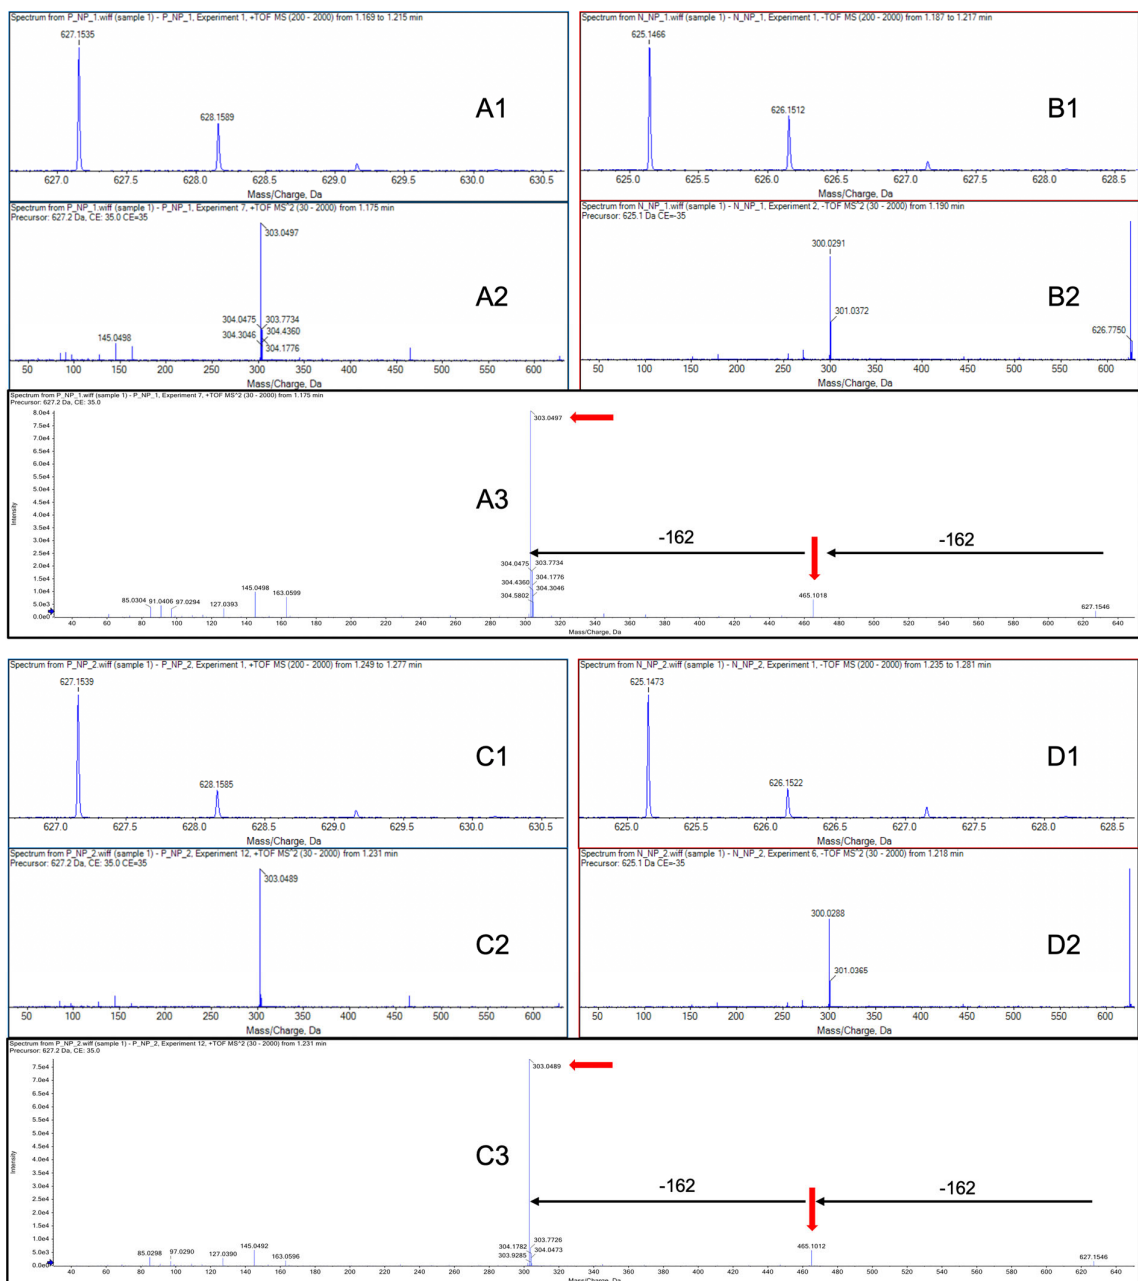

Figure S4. Mass spectra of precursors and fragments of purified compounds from NP.

A1, precursor of NP1 compound at positive mode; A2, fragment of NP1 compound at positive mode; A3, detailed fragment of NP1 at positive mode; B1, precursor of NP1 compound at negative mode; B2, fragment of NP1 compound at negative mode; C1, precursor of NP2 compound at positive mode; C2, fragment of NP2 compound at positive mode; C3, detailed fragment of NP2 at positive mode; D1, precursor of NP2 compound at negative mode; and D2, fragment of NP2 compound at negative mode.

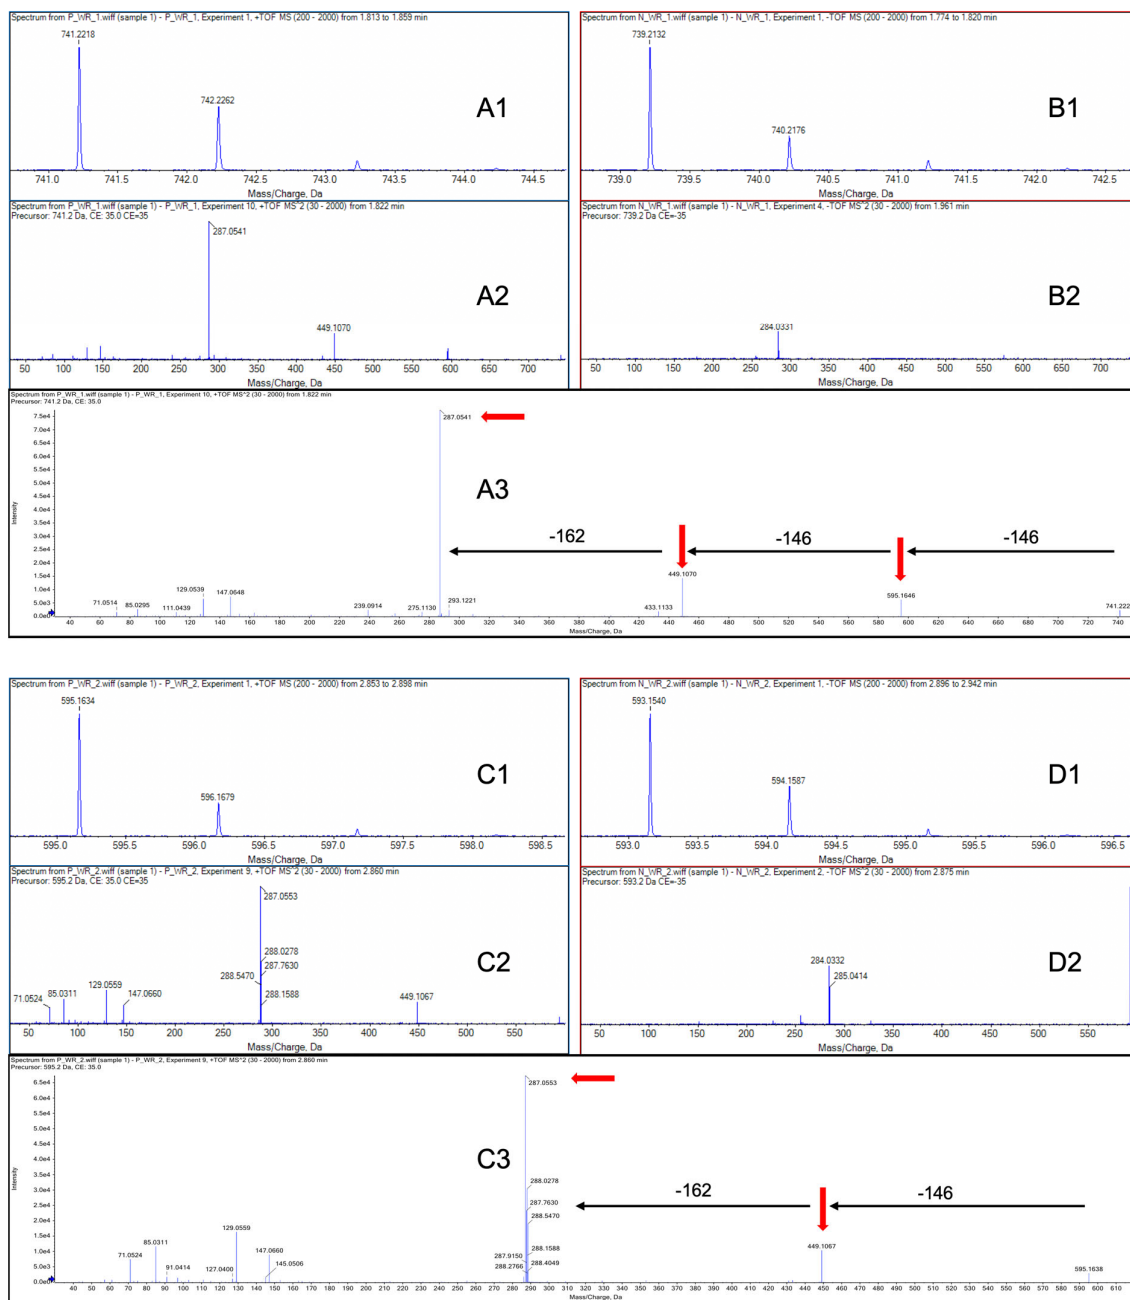

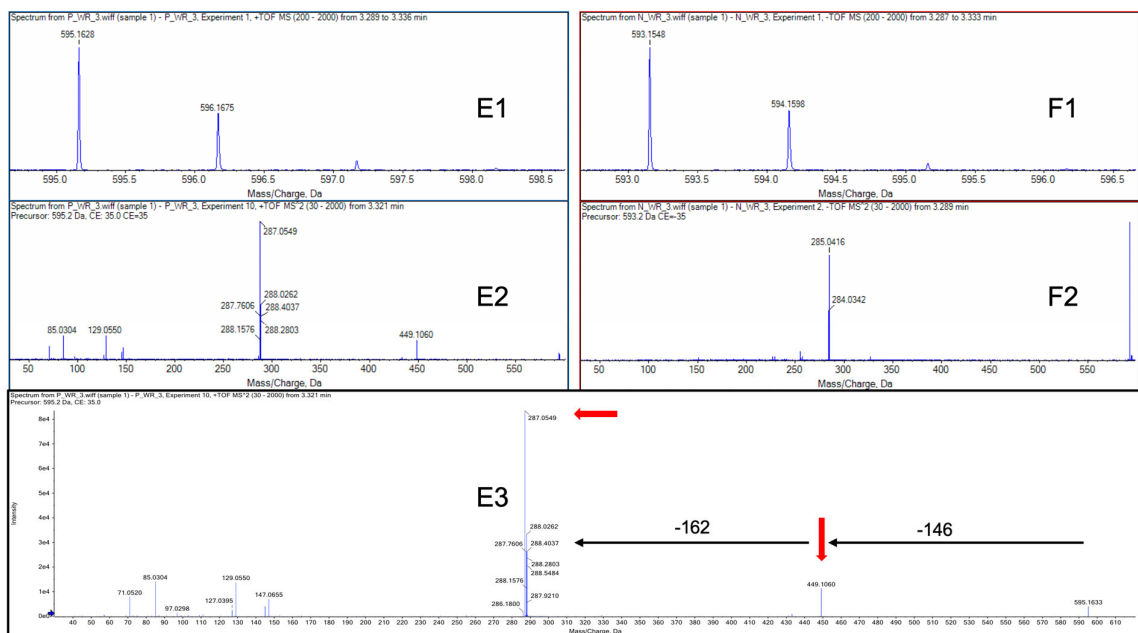

Figure S5. Mass spectra of precursors and fragments of purified compounds from WR.

A1, precursor of WR1 compound at positive mode; A2, fragment of WR1 compound at positive mode;  
A3, detailed fragment of WR1 at positive mode;  
B1, precursor of WR1 compound at negative mode; B2, fragment of WR1 compound at negative mode;  
C1, precursor of WR2 compound at positive mode; C2, fragment of WR2 compound at positive mode;  
C3, detailed fragment of WR2 at positive mode;  
D1, precursor of WR2 compound at negative mode; D2, fragment of WR2 compound at negative mode;  
E1, precursor of WR3 compound at positive mode; E2, fragment of WR3 compound at positive mode;  
E3, detailed fragment of WR3 at positive mode;  
F1, precursor of WR3 compound at negative mode; and F2, fragment of WR3 compound at negative mode

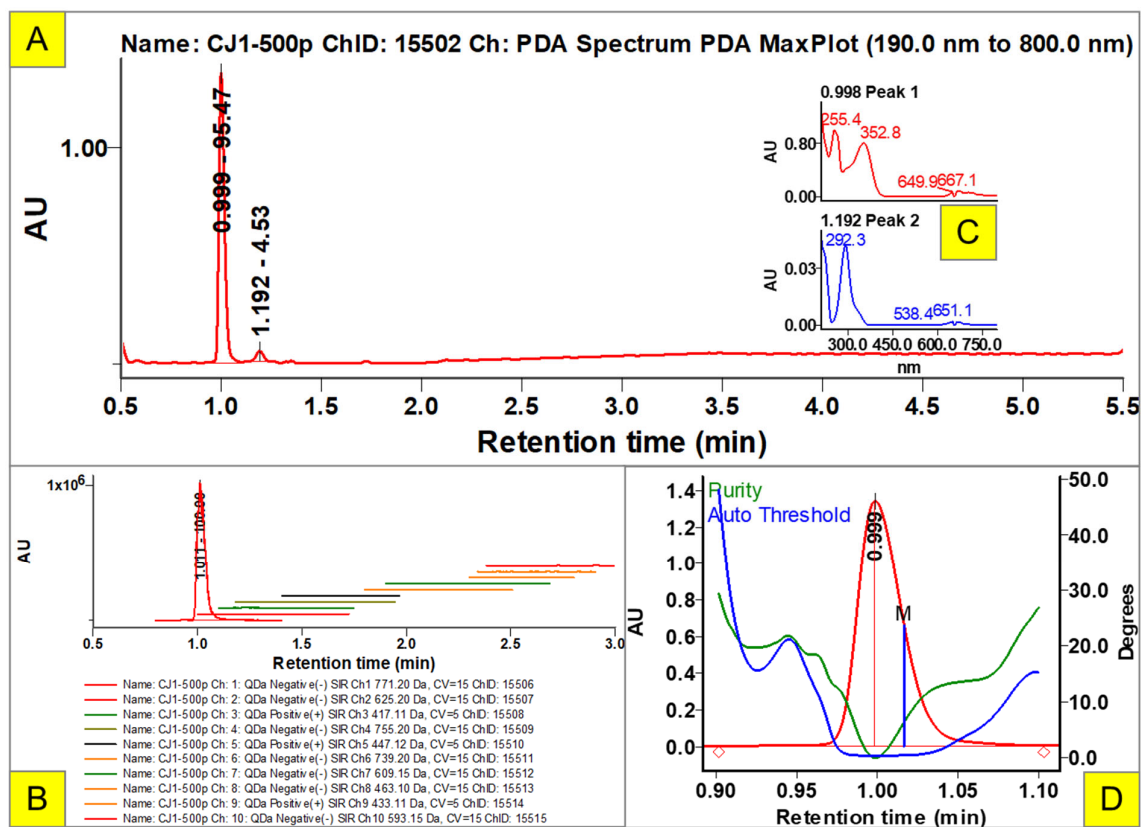

Figure S6. Spectral purity calculation for the purified compounds CJ1.

(A), PDA spectrum of the purified compound; (B), mass spectrum of the purified compound; (C), PDA spectrum of the peaks in the (A); (D), purity of the major peak analysed by Empower 3 software.



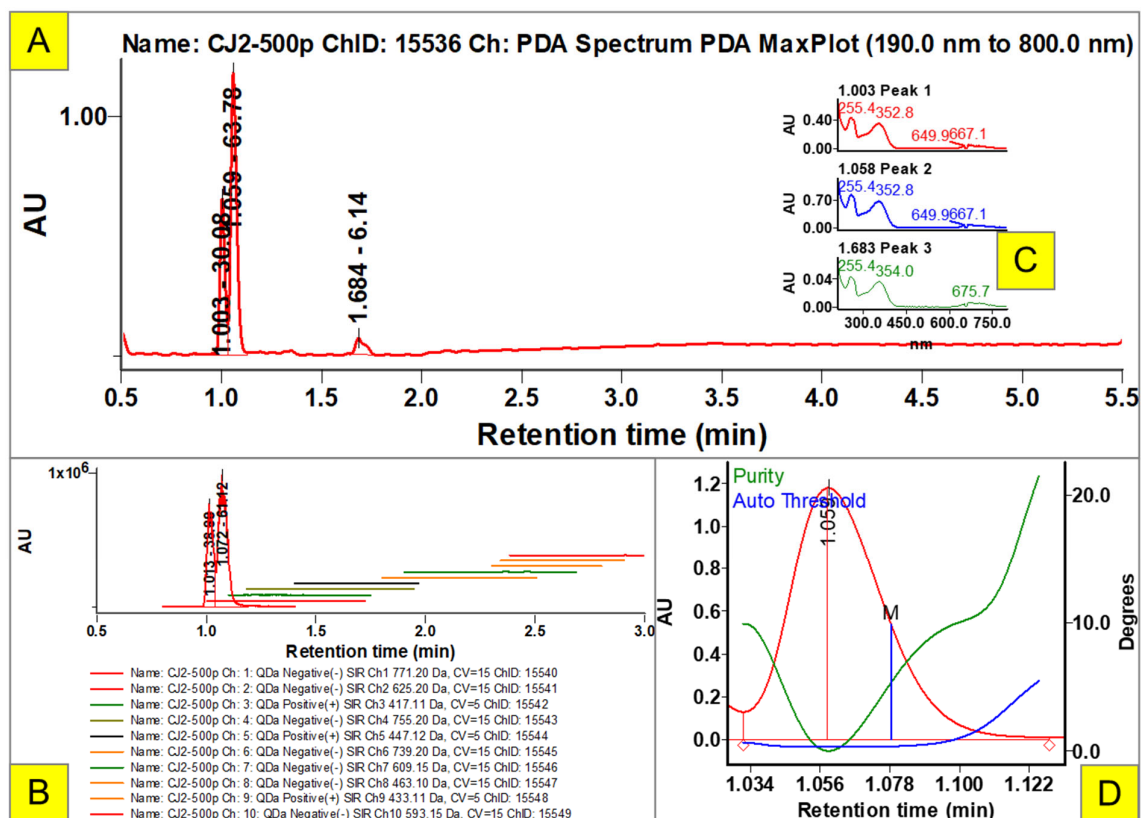

Figure S7. Spectral purity calculation for the purified compounds CJ2.

(A), PDA spectrum of the purified compound; (B), mass spectrum of the purified compound; (C), PDA spectrum of the peaks in the (A); (D), purity of the major peak analysed by Empower 3 software.

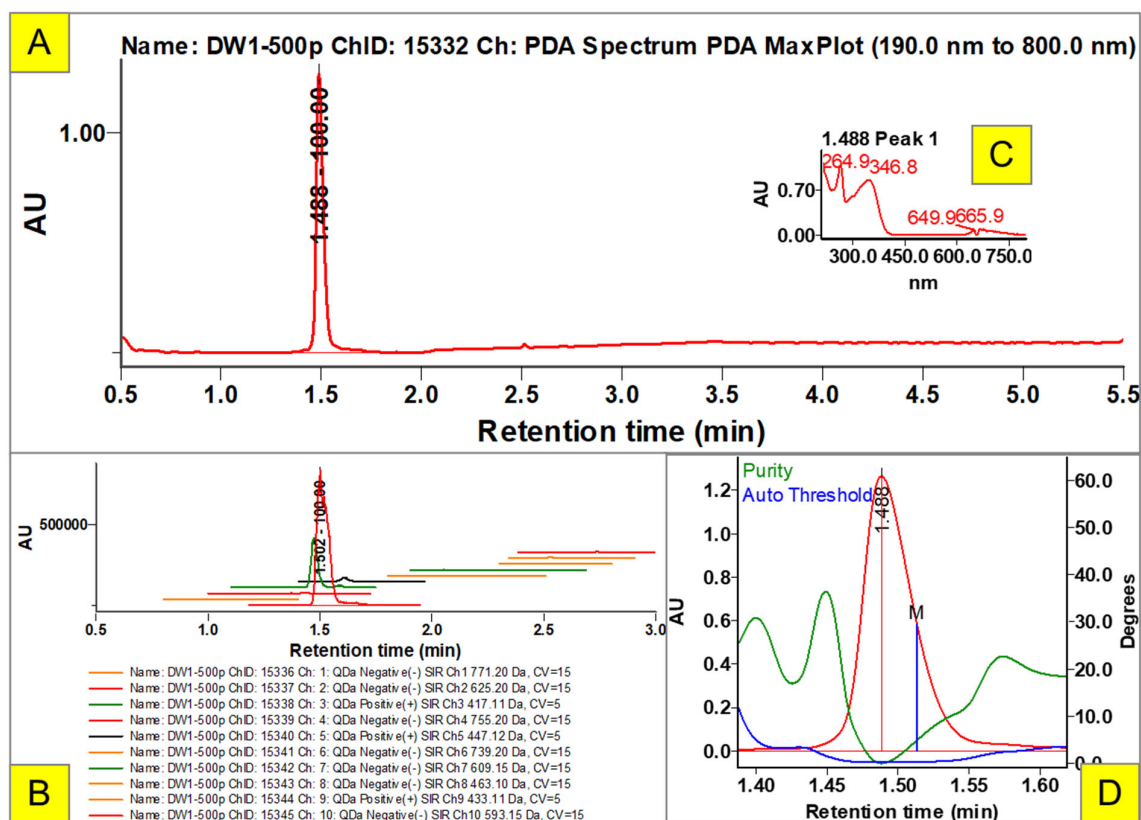

Figure S8. Spectral purity calculation for the purified compounds DW1.

(A), PDA spectrum of the purified compound; (B), mass spectrum of the purified compound; (C), PDA spectrum of the peaks in the (A); (D), purity of the major peak analysed by Empower 3 software.

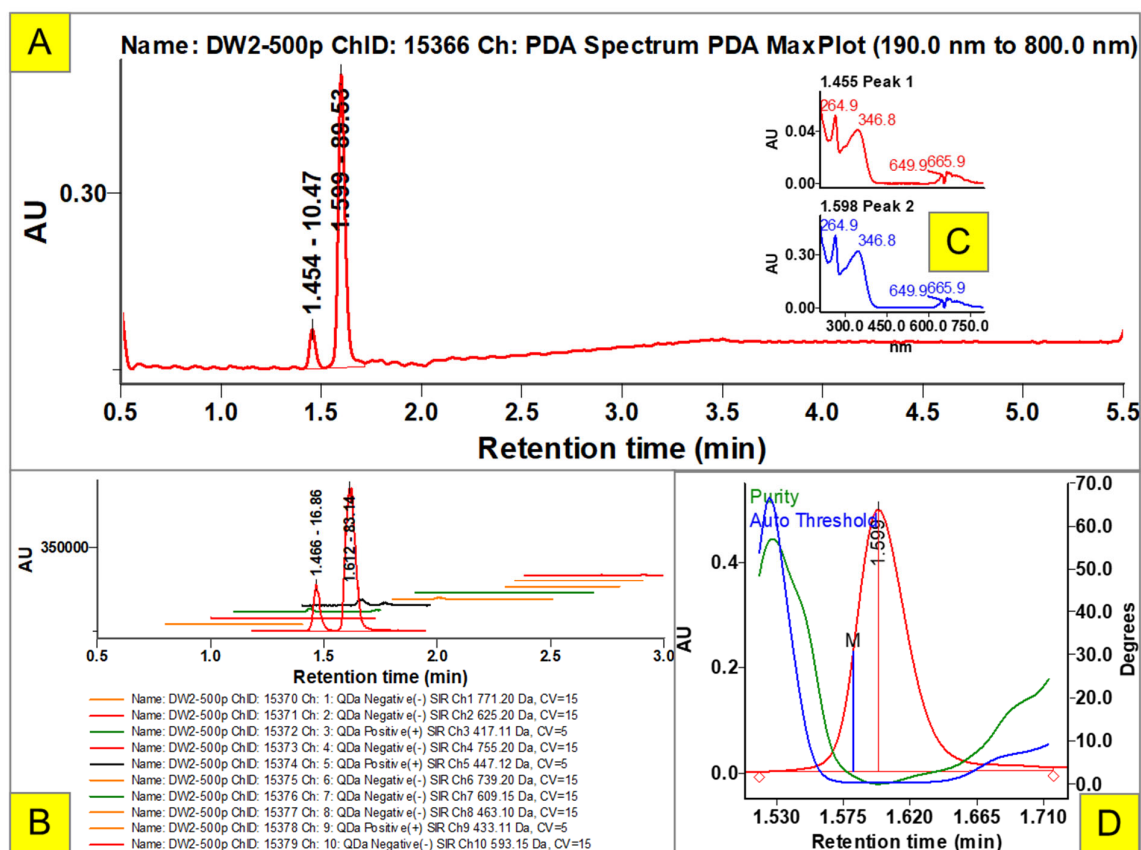

Figure S9. Spectral purity calculation for the purified compounds DW2.

(A), PDA spectrum of the purified compound; (B), mass spectrum of the purified compound; (C), PDA spectrum of the peaks in the (A); (D), purity of the major peak analysed by Empower 3 software.

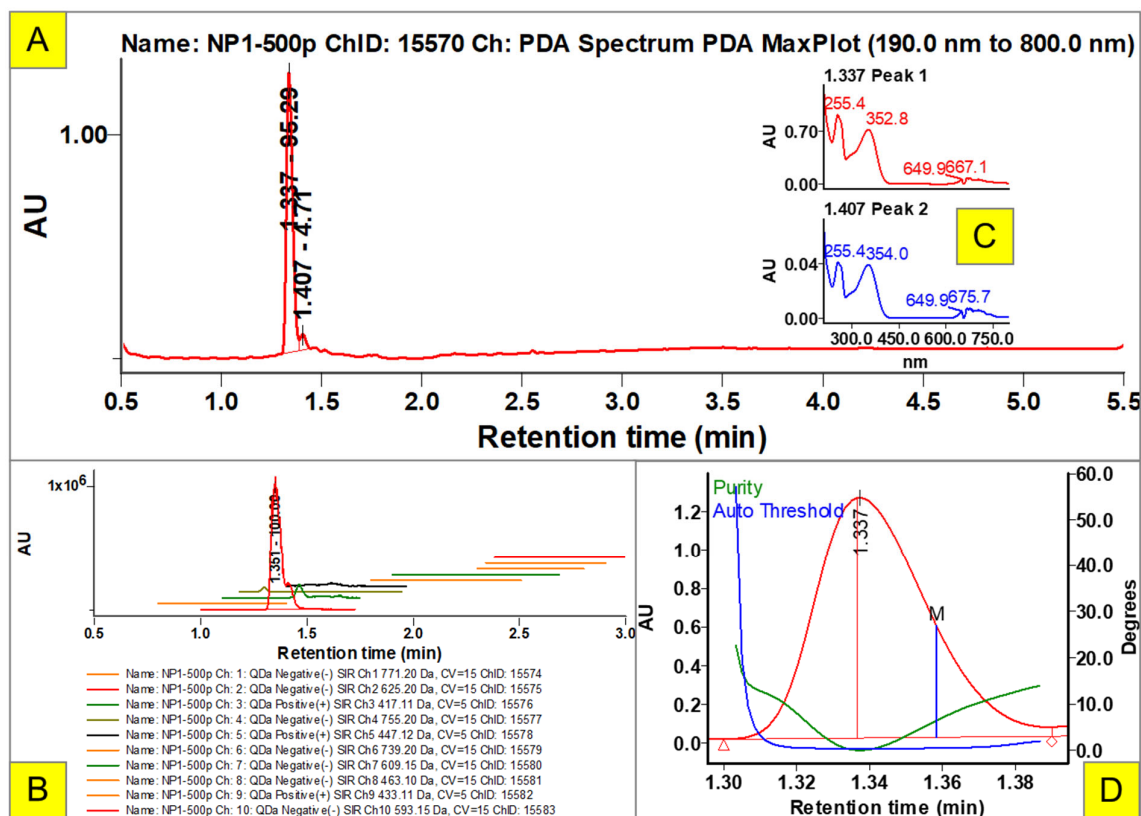

Figure S10. Spectral purity calculation for the purified compounds NP1.

(A), PDA spectrum of the purified compound; (B), mass spectrum of the purified compound; (C), PDA spectrum of the peaks in the (A); (D), purity of the major peak analysed by Empower 3 software.











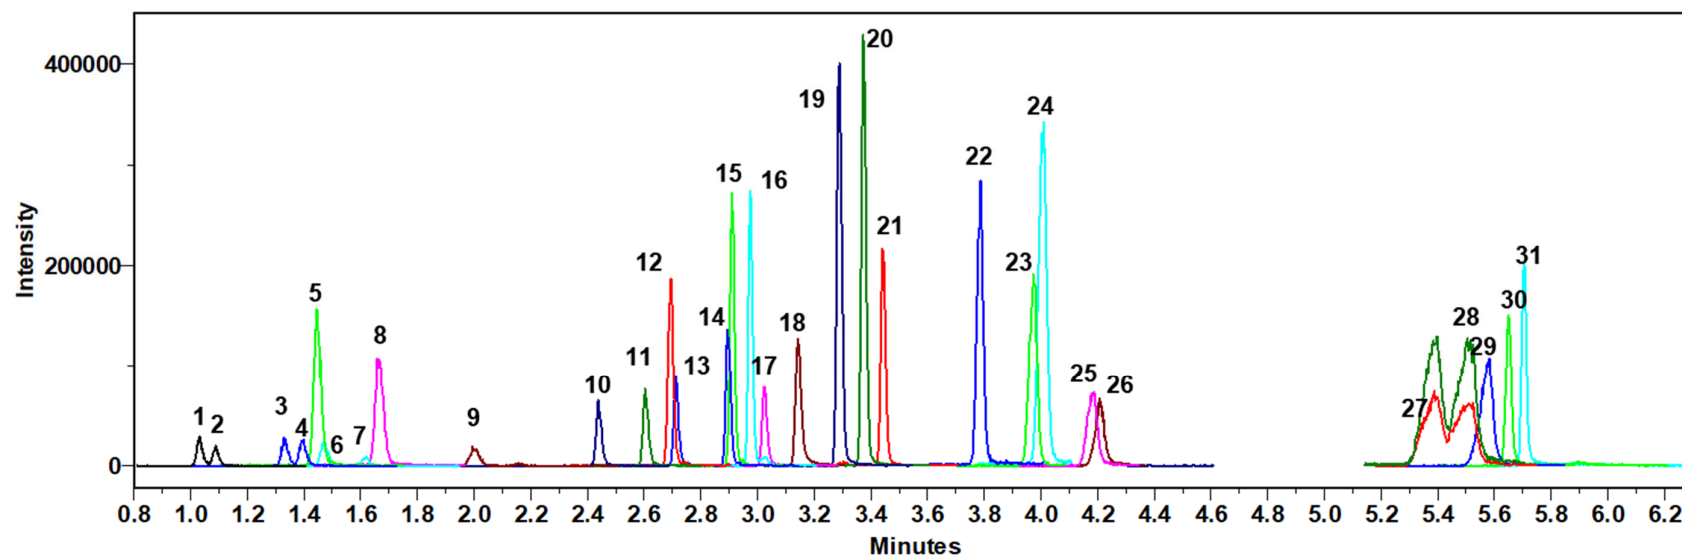

Figure S15. Overlaid single ion recording mass chromatogram of 31 compounds.

1, quercetin 3-*O*-tri-glycoside A; 2, quercetin 3-*O*-tri-glycoside B; 3, quercetin 3-*O*-di-glycoside A; 4, quercetin 3-*O*-di-glycoside B; 5, daidzin; 6, kaempferol 3-*O*-tri-glycoside A; 7, kaempferol 3-*O*-tri-glycoside B; 8, glycitin; 9, kaempferol 3-*O*-tri-glycoside C; 10, rutin; 11, isoquercitrin; 12, genistin; 13, kaempferol 3-*O*-di-glycoside A; 14, kaempferol 3-*O*-di-glycoside B; 15, malonyl daidzin; 16, malonyl glycitin; 17, astragalin; 18, apigenin 7-*O*-glucoside; 19, acetyl daidzin; 20, acetyl glycitin; 21, malonyl genistin; 22, daidzein; 23, acetyl genistin; 24, glycitein; 25, luteolin; 26, quercetin; 27, genistein; 28, apigenin; 29, coumestrol ; 30, kaempferol; and 31, isorhamnetin. Refer to details of the compounds in Table S1.

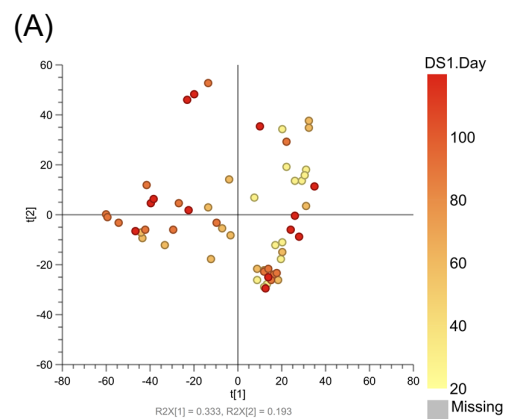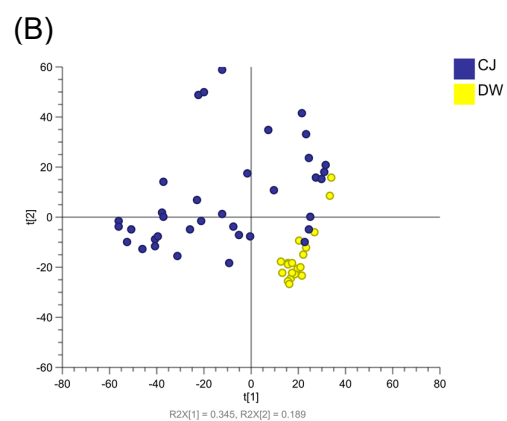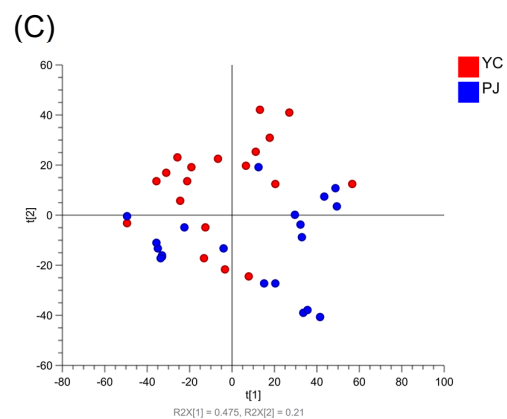

Figure S16. Multivariate analysis of SL metabolites.

(A) PCA-XY score plot for cultivation day, and PCA-X score plots for (B) variety of SB and (C) cultivation sites.

Neural

Validation Column: Validation0.6

(A)

Model NTanH(3)NBoost(6)

| Training                                                                                                                                                                                                                                                                                                                                                                                                                                                                                                                                                                       | Validation       | Test  |          |       |                     |           |                 |           |       |           |              |           |                        |    |                |           |          |    |                                                                                                                                                                                                                                                                                                                                                                                                                                 |       |       |          |       |                     |           |                 |           |       |          |              |           |                        |       |                |           |          |     |                                                                                                                                                                                                                                                                                                                                                                                                                                          |       |       |          |  |                                                                                                                                                                                                                                                                                                                                                                                                                                                                                                                                                                                |                  |                 |           |      |           |              |           |                        |           |                |           |          |     |    |    |    |     |  |    |       |       |       |       |  |    |       |       |       |       |  |    |       |       |       |       |  |     |       |       |       |       |  |                                                                                                                                                                                                                                                                                                                                                                                                                                                                                                                                                                                |                  |  |  |  |  |  |        |           |       |  |  |  |     |    |    |    |     |  |    |       |       |       |       |  |    |       |       |       |       |  |    |       |       |       |       |  |     |       |       |       |       |  |
|--------------------------------------------------------------------------------------------------------------------------------------------------------------------------------------------------------------------------------------------------------------------------------------------------------------------------------------------------------------------------------------------------------------------------------------------------------------------------------------------------------------------------------------------------------------------------------|------------------|-------|----------|-------|---------------------|-----------|-----------------|-----------|-------|-----------|--------------|-----------|------------------------|----|----------------|-----------|----------|----|---------------------------------------------------------------------------------------------------------------------------------------------------------------------------------------------------------------------------------------------------------------------------------------------------------------------------------------------------------------------------------------------------------------------------------|-------|-------|----------|-------|---------------------|-----------|-----------------|-----------|-------|----------|--------------|-----------|------------------------|-------|----------------|-----------|----------|-----|------------------------------------------------------------------------------------------------------------------------------------------------------------------------------------------------------------------------------------------------------------------------------------------------------------------------------------------------------------------------------------------------------------------------------------------|-------|-------|----------|--|--------------------------------------------------------------------------------------------------------------------------------------------------------------------------------------------------------------------------------------------------------------------------------------------------------------------------------------------------------------------------------------------------------------------------------------------------------------------------------------------------------------------------------------------------------------------------------|------------------|-----------------|-----------|------|-----------|--------------|-----------|------------------------|-----------|----------------|-----------|----------|-----|----|----|----|-----|--|----|-------|-------|-------|-------|--|----|-------|-------|-------|-------|--|----|-------|-------|-------|-------|--|-----|-------|-------|-------|-------|--|--------------------------------------------------------------------------------------------------------------------------------------------------------------------------------------------------------------------------------------------------------------------------------------------------------------------------------------------------------------------------------------------------------------------------------------------------------------------------------------------------------------------------------------------------------------------------------|------------------|--|--|--|--|--|--------|-----------|-------|--|--|--|-----|----|----|----|-----|--|----|-------|-------|-------|-------|--|----|-------|-------|-------|-------|--|----|-------|-------|-------|-------|--|-----|-------|-------|-------|-------|--|
| <table><tr><th>Day</th><th>Value</th></tr><tr><td>Measures</td><td></td></tr><tr><td>Generalized RSquare</td><td>0.9999255</td></tr><tr><td>Entropy RSquare</td><td>0.9996209</td></tr><tr><td>RMSE</td><td>0.0011122</td></tr><tr><td>Mean Abs Dev</td><td>0.0005087</td></tr><tr><td>Misclassification Rate</td><td>0</td></tr><tr><td>-LogLikelihood</td><td>0.0178279</td></tr><tr><td>Sum Freq</td><td>35</td></tr></table>                                                                                                                                               | Day              | Value | Measures |       | Generalized RSquare | 0.9999255 | Entropy RSquare | 0.9996209 | RMSE  | 0.0011122 | Mean Abs Dev | 0.0005087 | Misclassification Rate | 0  | -LogLikelihood | 0.0178279 | Sum Freq | 35 | <table><tr><th>Day</th><th>Value</th></tr><tr><td>Measures</td><td></td></tr><tr><td>Generalized RSquare</td><td>0.9864539</td></tr><tr><td>Entropy RSquare</td><td>0.9410184</td></tr><tr><td>RMSE</td><td>0.115642</td></tr><tr><td>Mean Abs Dev</td><td>0.0674734</td></tr><tr><td>Misclassification Rate</td><td>0</td></tr><tr><td>-LogLikelihood</td><td>0.9102448</td></tr><tr><td>Sum Freq</td><td>12</td></tr></table> | Day   | Value | Measures |       | Generalized RSquare | 0.9864539 | Entropy RSquare | 0.9410184 | RMSE  | 0.115642 | Mean Abs Dev | 0.0674734 | Misclassification Rate | 0     | -LogLikelihood | 0.9102448 | Sum Freq | 12  | <table><tr><th>Day</th><th>Value</th></tr><tr><td>Measures</td><td></td></tr><tr><td>Generalized RSquare</td><td>0.9596596</td></tr><tr><td>Entropy RSquare</td><td>0.8630507</td></tr><tr><td>RMSE</td><td>0.2268725</td></tr><tr><td>Mean Abs Dev</td><td>0.1100007</td></tr><tr><td>Misclassification Rate</td><td>0.0909091</td></tr><tr><td>-LogLikelihood</td><td>1.7603052</td></tr><tr><td>Sum Freq</td><td>11</td></tr></table> | Day   | Value | Measures |  | Generalized RSquare                                                                                                                                                                                                                                                                                                                                                                                                                                                                                                                                                            | 0.9596596        | Entropy RSquare | 0.8630507 | RMSE | 0.2268725 | Mean Abs Dev | 0.1100007 | Misclassification Rate | 0.0909091 | -LogLikelihood | 1.7603052 | Sum Freq | 11  |    |    |    |     |  |    |       |       |       |       |  |    |       |       |       |       |  |    |       |       |       |       |  |     |       |       |       |       |  |                                                                                                                                                                                                                                                                                                                                                                                                                                                                                                                                                                                |                  |  |  |  |  |  |        |           |       |  |  |  |     |    |    |    |     |  |    |       |       |       |       |  |    |       |       |       |       |  |    |       |       |       |       |  |     |       |       |       |       |  |
| Day                                                                                                                                                                                                                                                                                                                                                                                                                                                                                                                                                                            | Value            |       |          |       |                     |           |                 |           |       |           |              |           |                        |    |                |           |          |    |                                                                                                                                                                                                                                                                                                                                                                                                                                 |       |       |          |       |                     |           |                 |           |       |          |              |           |                        |       |                |           |          |     |                                                                                                                                                                                                                                                                                                                                                                                                                                          |       |       |          |  |                                                                                                                                                                                                                                                                                                                                                                                                                                                                                                                                                                                |                  |                 |           |      |           |              |           |                        |           |                |           |          |     |    |    |    |     |  |    |       |       |       |       |  |    |       |       |       |       |  |    |       |       |       |       |  |     |       |       |       |       |  |                                                                                                                                                                                                                                                                                                                                                                                                                                                                                                                                                                                |                  |  |  |  |  |  |        |           |       |  |  |  |     |    |    |    |     |  |    |       |       |       |       |  |    |       |       |       |       |  |    |       |       |       |       |  |     |       |       |       |       |  |
| Measures                                                                                                                                                                                                                                                                                                                                                                                                                                                                                                                                                                       |                  |       |          |       |                     |           |                 |           |       |           |              |           |                        |    |                |           |          |    |                                                                                                                                                                                                                                                                                                                                                                                                                                 |       |       |          |       |                     |           |                 |           |       |          |              |           |                        |       |                |           |          |     |                                                                                                                                                                                                                                                                                                                                                                                                                                          |       |       |          |  |                                                                                                                                                                                                                                                                                                                                                                                                                                                                                                                                                                                |                  |                 |           |      |           |              |           |                        |           |                |           |          |     |    |    |    |     |  |    |       |       |       |       |  |    |       |       |       |       |  |    |       |       |       |       |  |     |       |       |       |       |  |                                                                                                                                                                                                                                                                                                                                                                                                                                                                                                                                                                                |                  |  |  |  |  |  |        |           |       |  |  |  |     |    |    |    |     |  |    |       |       |       |       |  |    |       |       |       |       |  |    |       |       |       |       |  |     |       |       |       |       |  |
| Generalized RSquare                                                                                                                                                                                                                                                                                                                                                                                                                                                                                                                                                            | 0.9999255        |       |          |       |                     |           |                 |           |       |           |              |           |                        |    |                |           |          |    |                                                                                                                                                                                                                                                                                                                                                                                                                                 |       |       |          |       |                     |           |                 |           |       |          |              |           |                        |       |                |           |          |     |                                                                                                                                                                                                                                                                                                                                                                                                                                          |       |       |          |  |                                                                                                                                                                                                                                                                                                                                                                                                                                                                                                                                                                                |                  |                 |           |      |           |              |           |                        |           |                |           |          |     |    |    |    |     |  |    |       |       |       |       |  |    |       |       |       |       |  |    |       |       |       |       |  |     |       |       |       |       |  |                                                                                                                                                                                                                                                                                                                                                                                                                                                                                                                                                                                |                  |  |  |  |  |  |        |           |       |  |  |  |     |    |    |    |     |  |    |       |       |       |       |  |    |       |       |       |       |  |    |       |       |       |       |  |     |       |       |       |       |  |
| Entropy RSquare                                                                                                                                                                                                                                                                                                                                                                                                                                                                                                                                                                | 0.9996209        |       |          |       |                     |           |                 |           |       |           |              |           |                        |    |                |           |          |    |                                                                                                                                                                                                                                                                                                                                                                                                                                 |       |       |          |       |                     |           |                 |           |       |          |              |           |                        |       |                |           |          |     |                                                                                                                                                                                                                                                                                                                                                                                                                                          |       |       |          |  |                                                                                                                                                                                                                                                                                                                                                                                                                                                                                                                                                                                |                  |                 |           |      |           |              |           |                        |           |                |           |          |     |    |    |    |     |  |    |       |       |       |       |  |    |       |       |       |       |  |    |       |       |       |       |  |     |       |       |       |       |  |                                                                                                                                                                                                                                                                                                                                                                                                                                                                                                                                                                                |                  |  |  |  |  |  |        |           |       |  |  |  |     |    |    |    |     |  |    |       |       |       |       |  |    |       |       |       |       |  |    |       |       |       |       |  |     |       |       |       |       |  |
| RMSE                                                                                                                                                                                                                                                                                                                                                                                                                                                                                                                                                                           | 0.0011122        |       |          |       |                     |           |                 |           |       |           |              |           |                        |    |                |           |          |    |                                                                                                                                                                                                                                                                                                                                                                                                                                 |       |       |          |       |                     |           |                 |           |       |          |              |           |                        |       |                |           |          |     |                                                                                                                                                                                                                                                                                                                                                                                                                                          |       |       |          |  |                                                                                                                                                                                                                                                                                                                                                                                                                                                                                                                                                                                |                  |                 |           |      |           |              |           |                        |           |                |           |          |     |    |    |    |     |  |    |       |       |       |       |  |    |       |       |       |       |  |    |       |       |       |       |  |     |       |       |       |       |  |                                                                                                                                                                                                                                                                                                                                                                                                                                                                                                                                                                                |                  |  |  |  |  |  |        |           |       |  |  |  |     |    |    |    |     |  |    |       |       |       |       |  |    |       |       |       |       |  |    |       |       |       |       |  |     |       |       |       |       |  |
| Mean Abs Dev                                                                                                                                                                                                                                                                                                                                                                                                                                                                                                                                                                   | 0.0005087        |       |          |       |                     |           |                 |           |       |           |              |           |                        |    |                |           |          |    |                                                                                                                                                                                                                                                                                                                                                                                                                                 |       |       |          |       |                     |           |                 |           |       |          |              |           |                        |       |                |           |          |     |                                                                                                                                                                                                                                                                                                                                                                                                                                          |       |       |          |  |                                                                                                                                                                                                                                                                                                                                                                                                                                                                                                                                                                                |                  |                 |           |      |           |              |           |                        |           |                |           |          |     |    |    |    |     |  |    |       |       |       |       |  |    |       |       |       |       |  |    |       |       |       |       |  |     |       |       |       |       |  |                                                                                                                                                                                                                                                                                                                                                                                                                                                                                                                                                                                |                  |  |  |  |  |  |        |           |       |  |  |  |     |    |    |    |     |  |    |       |       |       |       |  |    |       |       |       |       |  |    |       |       |       |       |  |     |       |       |       |       |  |
| Misclassification Rate                                                                                                                                                                                                                                                                                                                                                                                                                                                                                                                                                         | 0                |       |          |       |                     |           |                 |           |       |           |              |           |                        |    |                |           |          |    |                                                                                                                                                                                                                                                                                                                                                                                                                                 |       |       |          |       |                     |           |                 |           |       |          |              |           |                        |       |                |           |          |     |                                                                                                                                                                                                                                                                                                                                                                                                                                          |       |       |          |  |                                                                                                                                                                                                                                                                                                                                                                                                                                                                                                                                                                                |                  |                 |           |      |           |              |           |                        |           |                |           |          |     |    |    |    |     |  |    |       |       |       |       |  |    |       |       |       |       |  |    |       |       |       |       |  |     |       |       |       |       |  |                                                                                                                                                                                                                                                                                                                                                                                                                                                                                                                                                                                |                  |  |  |  |  |  |        |           |       |  |  |  |     |    |    |    |     |  |    |       |       |       |       |  |    |       |       |       |       |  |    |       |       |       |       |  |     |       |       |       |       |  |
| -LogLikelihood                                                                                                                                                                                                                                                                                                                                                                                                                                                                                                                                                                 | 0.0178279        |       |          |       |                     |           |                 |           |       |           |              |           |                        |    |                |           |          |    |                                                                                                                                                                                                                                                                                                                                                                                                                                 |       |       |          |       |                     |           |                 |           |       |          |              |           |                        |       |                |           |          |     |                                                                                                                                                                                                                                                                                                                                                                                                                                          |       |       |          |  |                                                                                                                                                                                                                                                                                                                                                                                                                                                                                                                                                                                |                  |                 |           |      |           |              |           |                        |           |                |           |          |     |    |    |    |     |  |    |       |       |       |       |  |    |       |       |       |       |  |    |       |       |       |       |  |     |       |       |       |       |  |                                                                                                                                                                                                                                                                                                                                                                                                                                                                                                                                                                                |                  |  |  |  |  |  |        |           |       |  |  |  |     |    |    |    |     |  |    |       |       |       |       |  |    |       |       |       |       |  |    |       |       |       |       |  |     |       |       |       |       |  |
| Sum Freq                                                                                                                                                                                                                                                                                                                                                                                                                                                                                                                                                                       | 35               |       |          |       |                     |           |                 |           |       |           |              |           |                        |    |                |           |          |    |                                                                                                                                                                                                                                                                                                                                                                                                                                 |       |       |          |       |                     |           |                 |           |       |          |              |           |                        |       |                |           |          |     |                                                                                                                                                                                                                                                                                                                                                                                                                                          |       |       |          |  |                                                                                                                                                                                                                                                                                                                                                                                                                                                                                                                                                                                |                  |                 |           |      |           |              |           |                        |           |                |           |          |     |    |    |    |     |  |    |       |       |       |       |  |    |       |       |       |       |  |    |       |       |       |       |  |     |       |       |       |       |  |                                                                                                                                                                                                                                                                                                                                                                                                                                                                                                                                                                                |                  |  |  |  |  |  |        |           |       |  |  |  |     |    |    |    |     |  |    |       |       |       |       |  |    |       |       |       |       |  |    |       |       |       |       |  |     |       |       |       |       |  |
| Day                                                                                                                                                                                                                                                                                                                                                                                                                                                                                                                                                                            | Value            |       |          |       |                     |           |                 |           |       |           |              |           |                        |    |                |           |          |    |                                                                                                                                                                                                                                                                                                                                                                                                                                 |       |       |          |       |                     |           |                 |           |       |          |              |           |                        |       |                |           |          |     |                                                                                                                                                                                                                                                                                                                                                                                                                                          |       |       |          |  |                                                                                                                                                                                                                                                                                                                                                                                                                                                                                                                                                                                |                  |                 |           |      |           |              |           |                        |           |                |           |          |     |    |    |    |     |  |    |       |       |       |       |  |    |       |       |       |       |  |    |       |       |       |       |  |     |       |       |       |       |  |                                                                                                                                                                                                                                                                                                                                                                                                                                                                                                                                                                                |                  |  |  |  |  |  |        |           |       |  |  |  |     |    |    |    |     |  |    |       |       |       |       |  |    |       |       |       |       |  |    |       |       |       |       |  |     |       |       |       |       |  |
| Measures                                                                                                                                                                                                                                                                                                                                                                                                                                                                                                                                                                       |                  |       |          |       |                     |           |                 |           |       |           |              |           |                        |    |                |           |          |    |                                                                                                                                                                                                                                                                                                                                                                                                                                 |       |       |          |       |                     |           |                 |           |       |          |              |           |                        |       |                |           |          |     |                                                                                                                                                                                                                                                                                                                                                                                                                                          |       |       |          |  |                                                                                                                                                                                                                                                                                                                                                                                                                                                                                                                                                                                |                  |                 |           |      |           |              |           |                        |           |                |           |          |     |    |    |    |     |  |    |       |       |       |       |  |    |       |       |       |       |  |    |       |       |       |       |  |     |       |       |       |       |  |                                                                                                                                                                                                                                                                                                                                                                                                                                                                                                                                                                                |                  |  |  |  |  |  |        |           |       |  |  |  |     |    |    |    |     |  |    |       |       |       |       |  |    |       |       |       |       |  |    |       |       |       |       |  |     |       |       |       |       |  |
| Generalized RSquare                                                                                                                                                                                                                                                                                                                                                                                                                                                                                                                                                            | 0.9864539        |       |          |       |                     |           |                 |           |       |           |              |           |                        |    |                |           |          |    |                                                                                                                                                                                                                                                                                                                                                                                                                                 |       |       |          |       |                     |           |                 |           |       |          |              |           |                        |       |                |           |          |     |                                                                                                                                                                                                                                                                                                                                                                                                                                          |       |       |          |  |                                                                                                                                                                                                                                                                                                                                                                                                                                                                                                                                                                                |                  |                 |           |      |           |              |           |                        |           |                |           |          |     |    |    |    |     |  |    |       |       |       |       |  |    |       |       |       |       |  |    |       |       |       |       |  |     |       |       |       |       |  |                                                                                                                                                                                                                                                                                                                                                                                                                                                                                                                                                                                |                  |  |  |  |  |  |        |           |       |  |  |  |     |    |    |    |     |  |    |       |       |       |       |  |    |       |       |       |       |  |    |       |       |       |       |  |     |       |       |       |       |  |
| Entropy RSquare                                                                                                                                                                                                                                                                                                                                                                                                                                                                                                                                                                | 0.9410184        |       |          |       |                     |           |                 |           |       |           |              |           |                        |    |                |           |          |    |                                                                                                                                                                                                                                                                                                                                                                                                                                 |       |       |          |       |                     |           |                 |           |       |          |              |           |                        |       |                |           |          |     |                                                                                                                                                                                                                                                                                                                                                                                                                                          |       |       |          |  |                                                                                                                                                                                                                                                                                                                                                                                                                                                                                                                                                                                |                  |                 |           |      |           |              |           |                        |           |                |           |          |     |    |    |    |     |  |    |       |       |       |       |  |    |       |       |       |       |  |    |       |       |       |       |  |     |       |       |       |       |  |                                                                                                                                                                                                                                                                                                                                                                                                                                                                                                                                                                                |                  |  |  |  |  |  |        |           |       |  |  |  |     |    |    |    |     |  |    |       |       |       |       |  |    |       |       |       |       |  |    |       |       |       |       |  |     |       |       |       |       |  |
| RMSE                                                                                                                                                                                                                                                                                                                                                                                                                                                                                                                                                                           | 0.115642         |       |          |       |                     |           |                 |           |       |           |              |           |                        |    |                |           |          |    |                                                                                                                                                                                                                                                                                                                                                                                                                                 |       |       |          |       |                     |           |                 |           |       |          |              |           |                        |       |                |           |          |     |                                                                                                                                                                                                                                                                                                                                                                                                                                          |       |       |          |  |                                                                                                                                                                                                                                                                                                                                                                                                                                                                                                                                                                                |                  |                 |           |      |           |              |           |                        |           |                |           |          |     |    |    |    |     |  |    |       |       |       |       |  |    |       |       |       |       |  |    |       |       |       |       |  |     |       |       |       |       |  |                                                                                                                                                                                                                                                                                                                                                                                                                                                                                                                                                                                |                  |  |  |  |  |  |        |           |       |  |  |  |     |    |    |    |     |  |    |       |       |       |       |  |    |       |       |       |       |  |    |       |       |       |       |  |     |       |       |       |       |  |
| Mean Abs Dev                                                                                                                                                                                                                                                                                                                                                                                                                                                                                                                                                                   | 0.0674734        |       |          |       |                     |           |                 |           |       |           |              |           |                        |    |                |           |          |    |                                                                                                                                                                                                                                                                                                                                                                                                                                 |       |       |          |       |                     |           |                 |           |       |          |              |           |                        |       |                |           |          |     |                                                                                                                                                                                                                                                                                                                                                                                                                                          |       |       |          |  |                                                                                                                                                                                                                                                                                                                                                                                                                                                                                                                                                                                |                  |                 |           |      |           |              |           |                        |           |                |           |          |     |    |    |    |     |  |    |       |       |       |       |  |    |       |       |       |       |  |    |       |       |       |       |  |     |       |       |       |       |  |                                                                                                                                                                                                                                                                                                                                                                                                                                                                                                                                                                                |                  |  |  |  |  |  |        |           |       |  |  |  |     |    |    |    |     |  |    |       |       |       |       |  |    |       |       |       |       |  |    |       |       |       |       |  |     |       |       |       |       |  |
| Misclassification Rate                                                                                                                                                                                                                                                                                                                                                                                                                                                                                                                                                         | 0                |       |          |       |                     |           |                 |           |       |           |              |           |                        |    |                |           |          |    |                                                                                                                                                                                                                                                                                                                                                                                                                                 |       |       |          |       |                     |           |                 |           |       |          |              |           |                        |       |                |           |          |     |                                                                                                                                                                                                                                                                                                                                                                                                                                          |       |       |          |  |                                                                                                                                                                                                                                                                                                                                                                                                                                                                                                                                                                                |                  |                 |           |      |           |              |           |                        |           |                |           |          |     |    |    |    |     |  |    |       |       |       |       |  |    |       |       |       |       |  |    |       |       |       |       |  |     |       |       |       |       |  |                                                                                                                                                                                                                                                                                                                                                                                                                                                                                                                                                                                |                  |  |  |  |  |  |        |           |       |  |  |  |     |    |    |    |     |  |    |       |       |       |       |  |    |       |       |       |       |  |    |       |       |       |       |  |     |       |       |       |       |  |
| -LogLikelihood                                                                                                                                                                                                                                                                                                                                                                                                                                                                                                                                                                 | 0.9102448        |       |          |       |                     |           |                 |           |       |           |              |           |                        |    |                |           |          |    |                                                                                                                                                                                                                                                                                                                                                                                                                                 |       |       |          |       |                     |           |                 |           |       |          |              |           |                        |       |                |           |          |     |                                                                                                                                                                                                                                                                                                                                                                                                                                          |       |       |          |  |                                                                                                                                                                                                                                                                                                                                                                                                                                                                                                                                                                                |                  |                 |           |      |           |              |           |                        |           |                |           |          |     |    |    |    |     |  |    |       |       |       |       |  |    |       |       |       |       |  |    |       |       |       |       |  |     |       |       |       |       |  |                                                                                                                                                                                                                                                                                                                                                                                                                                                                                                                                                                                |                  |  |  |  |  |  |        |           |       |  |  |  |     |    |    |    |     |  |    |       |       |       |       |  |    |       |       |       |       |  |    |       |       |       |       |  |     |       |       |       |       |  |
| Sum Freq                                                                                                                                                                                                                                                                                                                                                                                                                                                                                                                                                                       | 12               |       |          |       |                     |           |                 |           |       |           |              |           |                        |    |                |           |          |    |                                                                                                                                                                                                                                                                                                                                                                                                                                 |       |       |          |       |                     |           |                 |           |       |          |              |           |                        |       |                |           |          |     |                                                                                                                                                                                                                                                                                                                                                                                                                                          |       |       |          |  |                                                                                                                                                                                                                                                                                                                                                                                                                                                                                                                                                                                |                  |                 |           |      |           |              |           |                        |           |                |           |          |     |    |    |    |     |  |    |       |       |       |       |  |    |       |       |       |       |  |    |       |       |       |       |  |     |       |       |       |       |  |                                                                                                                                                                                                                                                                                                                                                                                                                                                                                                                                                                                |                  |  |  |  |  |  |        |           |       |  |  |  |     |    |    |    |     |  |    |       |       |       |       |  |    |       |       |       |       |  |    |       |       |       |       |  |     |       |       |       |       |  |
| Day                                                                                                                                                                                                                                                                                                                                                                                                                                                                                                                                                                            | Value            |       |          |       |                     |           |                 |           |       |           |              |           |                        |    |                |           |          |    |                                                                                                                                                                                                                                                                                                                                                                                                                                 |       |       |          |       |                     |           |                 |           |       |          |              |           |                        |       |                |           |          |     |                                                                                                                                                                                                                                                                                                                                                                                                                                          |       |       |          |  |                                                                                                                                                                                                                                                                                                                                                                                                                                                                                                                                                                                |                  |                 |           |      |           |              |           |                        |           |                |           |          |     |    |    |    |     |  |    |       |       |       |       |  |    |       |       |       |       |  |    |       |       |       |       |  |     |       |       |       |       |  |                                                                                                                                                                                                                                                                                                                                                                                                                                                                                                                                                                                |                  |  |  |  |  |  |        |           |       |  |  |  |     |    |    |    |     |  |    |       |       |       |       |  |    |       |       |       |       |  |    |       |       |       |       |  |     |       |       |       |       |  |
| Measures                                                                                                                                                                                                                                                                                                                                                                                                                                                                                                                                                                       |                  |       |          |       |                     |           |                 |           |       |           |              |           |                        |    |                |           |          |    |                                                                                                                                                                                                                                                                                                                                                                                                                                 |       |       |          |       |                     |           |                 |           |       |          |              |           |                        |       |                |           |          |     |                                                                                                                                                                                                                                                                                                                                                                                                                                          |       |       |          |  |                                                                                                                                                                                                                                                                                                                                                                                                                                                                                                                                                                                |                  |                 |           |      |           |              |           |                        |           |                |           |          |     |    |    |    |     |  |    |       |       |       |       |  |    |       |       |       |       |  |    |       |       |       |       |  |     |       |       |       |       |  |                                                                                                                                                                                                                                                                                                                                                                                                                                                                                                                                                                                |                  |  |  |  |  |  |        |           |       |  |  |  |     |    |    |    |     |  |    |       |       |       |       |  |    |       |       |       |       |  |    |       |       |       |       |  |     |       |       |       |       |  |
| Generalized RSquare                                                                                                                                                                                                                                                                                                                                                                                                                                                                                                                                                            | 0.9596596        |       |          |       |                     |           |                 |           |       |           |              |           |                        |    |                |           |          |    |                                                                                                                                                                                                                                                                                                                                                                                                                                 |       |       |          |       |                     |           |                 |           |       |          |              |           |                        |       |                |           |          |     |                                                                                                                                                                                                                                                                                                                                                                                                                                          |       |       |          |  |                                                                                                                                                                                                                                                                                                                                                                                                                                                                                                                                                                                |                  |                 |           |      |           |              |           |                        |           |                |           |          |     |    |    |    |     |  |    |       |       |       |       |  |    |       |       |       |       |  |    |       |       |       |       |  |     |       |       |       |       |  |                                                                                                                                                                                                                                                                                                                                                                                                                                                                                                                                                                                |                  |  |  |  |  |  |        |           |       |  |  |  |     |    |    |    |     |  |    |       |       |       |       |  |    |       |       |       |       |  |    |       |       |       |       |  |     |       |       |       |       |  |
| Entropy RSquare                                                                                                                                                                                                                                                                                                                                                                                                                                                                                                                                                                | 0.8630507        |       |          |       |                     |           |                 |           |       |           |              |           |                        |    |                |           |          |    |                                                                                                                                                                                                                                                                                                                                                                                                                                 |       |       |          |       |                     |           |                 |           |       |          |              |           |                        |       |                |           |          |     |                                                                                                                                                                                                                                                                                                                                                                                                                                          |       |       |          |  |                                                                                                                                                                                                                                                                                                                                                                                                                                                                                                                                                                                |                  |                 |           |      |           |              |           |                        |           |                |           |          |     |    |    |    |     |  |    |       |       |       |       |  |    |       |       |       |       |  |    |       |       |       |       |  |     |       |       |       |       |  |                                                                                                                                                                                                                                                                                                                                                                                                                                                                                                                                                                                |                  |  |  |  |  |  |        |           |       |  |  |  |     |    |    |    |     |  |    |       |       |       |       |  |    |       |       |       |       |  |    |       |       |       |       |  |     |       |       |       |       |  |
| RMSE                                                                                                                                                                                                                                                                                                                                                                                                                                                                                                                                                                           | 0.2268725        |       |          |       |                     |           |                 |           |       |           |              |           |                        |    |                |           |          |    |                                                                                                                                                                                                                                                                                                                                                                                                                                 |       |       |          |       |                     |           |                 |           |       |          |              |           |                        |       |                |           |          |     |                                                                                                                                                                                                                                                                                                                                                                                                                                          |       |       |          |  |                                                                                                                                                                                                                                                                                                                                                                                                                                                                                                                                                                                |                  |                 |           |      |           |              |           |                        |           |                |           |          |     |    |    |    |     |  |    |       |       |       |       |  |    |       |       |       |       |  |    |       |       |       |       |  |     |       |       |       |       |  |                                                                                                                                                                                                                                                                                                                                                                                                                                                                                                                                                                                |                  |  |  |  |  |  |        |           |       |  |  |  |     |    |    |    |     |  |    |       |       |       |       |  |    |       |       |       |       |  |    |       |       |       |       |  |     |       |       |       |       |  |
| Mean Abs Dev                                                                                                                                                                                                                                                                                                                                                                                                                                                                                                                                                                   | 0.1100007        |       |          |       |                     |           |                 |           |       |           |              |           |                        |    |                |           |          |    |                                                                                                                                                                                                                                                                                                                                                                                                                                 |       |       |          |       |                     |           |                 |           |       |          |              |           |                        |       |                |           |          |     |                                                                                                                                                                                                                                                                                                                                                                                                                                          |       |       |          |  |                                                                                                                                                                                                                                                                                                                                                                                                                                                                                                                                                                                |                  |                 |           |      |           |              |           |                        |           |                |           |          |     |    |    |    |     |  |    |       |       |       |       |  |    |       |       |       |       |  |    |       |       |       |       |  |     |       |       |       |       |  |                                                                                                                                                                                                                                                                                                                                                                                                                                                                                                                                                                                |                  |  |  |  |  |  |        |           |       |  |  |  |     |    |    |    |     |  |    |       |       |       |       |  |    |       |       |       |       |  |    |       |       |       |       |  |     |       |       |       |       |  |
| Misclassification Rate                                                                                                                                                                                                                                                                                                                                                                                                                                                                                                                                                         | 0.0909091        |       |          |       |                     |           |                 |           |       |           |              |           |                        |    |                |           |          |    |                                                                                                                                                                                                                                                                                                                                                                                                                                 |       |       |          |       |                     |           |                 |           |       |          |              |           |                        |       |                |           |          |     |                                                                                                                                                                                                                                                                                                                                                                                                                                          |       |       |          |  |                                                                                                                                                                                                                                                                                                                                                                                                                                                                                                                                                                                |                  |                 |           |      |           |              |           |                        |           |                |           |          |     |    |    |    |     |  |    |       |       |       |       |  |    |       |       |       |       |  |    |       |       |       |       |  |     |       |       |       |       |  |                                                                                                                                                                                                                                                                                                                                                                                                                                                                                                                                                                                |                  |  |  |  |  |  |        |           |       |  |  |  |     |    |    |    |     |  |    |       |       |       |       |  |    |       |       |       |       |  |    |       |       |       |       |  |     |       |       |       |       |  |
| -LogLikelihood                                                                                                                                                                                                                                                                                                                                                                                                                                                                                                                                                                 | 1.7603052        |       |          |       |                     |           |                 |           |       |           |              |           |                        |    |                |           |          |    |                                                                                                                                                                                                                                                                                                                                                                                                                                 |       |       |          |       |                     |           |                 |           |       |          |              |           |                        |       |                |           |          |     |                                                                                                                                                                                                                                                                                                                                                                                                                                          |       |       |          |  |                                                                                                                                                                                                                                                                                                                                                                                                                                                                                                                                                                                |                  |                 |           |      |           |              |           |                        |           |                |           |          |     |    |    |    |     |  |    |       |       |       |       |  |    |       |       |       |       |  |    |       |       |       |       |  |     |       |       |       |       |  |                                                                                                                                                                                                                                                                                                                                                                                                                                                                                                                                                                                |                  |  |  |  |  |  |        |           |       |  |  |  |     |    |    |    |     |  |    |       |       |       |       |  |    |       |       |       |       |  |    |       |       |       |       |  |     |       |       |       |       |  |
| Sum Freq                                                                                                                                                                                                                                                                                                                                                                                                                                                                                                                                                                       | 11               |       |          |       |                     |           |                 |           |       |           |              |           |                        |    |                |           |          |    |                                                                                                                                                                                                                                                                                                                                                                                                                                 |       |       |          |       |                     |           |                 |           |       |          |              |           |                        |       |                |           |          |     |                                                                                                                                                                                                                                                                                                                                                                                                                                          |       |       |          |  |                                                                                                                                                                                                                                                                                                                                                                                                                                                                                                                                                                                |                  |                 |           |      |           |              |           |                        |           |                |           |          |     |    |    |    |     |  |    |       |       |       |       |  |    |       |       |       |       |  |    |       |       |       |       |  |     |       |       |       |       |  |                                                                                                                                                                                                                                                                                                                                                                                                                                                                                                                                                                                |                  |  |  |  |  |  |        |           |       |  |  |  |     |    |    |    |     |  |    |       |       |       |       |  |    |       |       |       |       |  |    |       |       |       |       |  |     |       |       |       |       |  |
| <table><tr><th colspan="6">Confusion Matrix</th></tr><tr><th>Actual</th><th>Predicted</th><th>Count</th><th></th><th></th><th></th></tr><tr><th>Day</th><th>30</th><th>60</th><th>90</th><th>120</th><th></th></tr><tr><td>30</td><td>5</td><td>0</td><td>0</td><td>0</td><td></td></tr><tr><td>60</td><td>0</td><td>9</td><td>0</td><td>0</td><td></td></tr><tr><td>90</td><td>0</td><td>0</td><td>9</td><td>0</td><td></td></tr><tr><td>120</td><td>0</td><td>0</td><td>0</td><td>12</td><td></td></tr></table>                                                              | Confusion Matrix |       |          |       |                     |           | Actual          | Predicted | Count |           |              |           | Day                    | 30 | 60             | 90        | 120      |    | 30                                                                                                                                                                                                                                                                                                                                                                                                                              | 5     | 0     | 0        | 0     |                     | 60        | 0               | 9         | 0     | 0        |              | 90        | 0                      | 0     | 9              | 0         |          | 120 | 0                                                                                                                                                                                                                                                                                                                                                                                                                                        | 0     | 0     | 12       |  | <table><tr><th colspan="6">Confusion Matrix</th></tr><tr><th>Actual</th><th>Predicted</th><th>Count</th><th></th><th></th><th></th></tr><tr><th>Day</th><th>30</th><th>60</th><th>90</th><th>120</th><th></th></tr><tr><td>30</td><td>3</td><td>0</td><td>0</td><td>0</td><td></td></tr><tr><td>60</td><td>0</td><td>4</td><td>0</td><td>0</td><td></td></tr><tr><td>90</td><td>0</td><td>0</td><td>4</td><td>0</td><td></td></tr><tr><td>120</td><td>0</td><td>0</td><td>0</td><td>1</td><td></td></tr></table>                                                               | Confusion Matrix |                 |           |      |           |              | Actual    | Predicted              | Count     |                |           |          | Day | 30 | 60 | 90 | 120 |  | 30 | 3     | 0     | 0     | 0     |  | 60 | 0     | 4     | 0     | 0     |  | 90 | 0     | 0     | 4     | 0     |  | 120 | 0     | 0     | 0     | 1     |  | <table><tr><th colspan="6">Confusion Matrix</th></tr><tr><th>Actual</th><th>Predicted</th><th>Count</th><th></th><th></th><th></th></tr><tr><th>Day</th><th>30</th><th>60</th><th>90</th><th>120</th><th></th></tr><tr><td>30</td><td>5</td><td>1</td><td>0</td><td>0</td><td></td></tr><tr><td>60</td><td>0</td><td>2</td><td>0</td><td>0</td><td></td></tr><tr><td>90</td><td>0</td><td>0</td><td>2</td><td>0</td><td></td></tr><tr><td>120</td><td>0</td><td>0</td><td>0</td><td>1</td><td></td></tr></table>                                                               | Confusion Matrix |  |  |  |  |  | Actual | Predicted | Count |  |  |  | Day | 30 | 60 | 90 | 120 |  | 30 | 5     | 1     | 0     | 0     |  | 60 | 0     | 2     | 0     | 0     |  | 90 | 0     | 0     | 2     | 0     |  | 120 | 0     | 0     | 0     | 1     |  |
| Confusion Matrix                                                                                                                                                                                                                                                                                                                                                                                                                                                                                                                                                               |                  |       |          |       |                     |           |                 |           |       |           |              |           |                        |    |                |           |          |    |                                                                                                                                                                                                                                                                                                                                                                                                                                 |       |       |          |       |                     |           |                 |           |       |          |              |           |                        |       |                |           |          |     |                                                                                                                                                                                                                                                                                                                                                                                                                                          |       |       |          |  |                                                                                                                                                                                                                                                                                                                                                                                                                                                                                                                                                                                |                  |                 |           |      |           |              |           |                        |           |                |           |          |     |    |    |    |     |  |    |       |       |       |       |  |    |       |       |       |       |  |    |       |       |       |       |  |     |       |       |       |       |  |                                                                                                                                                                                                                                                                                                                                                                                                                                                                                                                                                                                |                  |  |  |  |  |  |        |           |       |  |  |  |     |    |    |    |     |  |    |       |       |       |       |  |    |       |       |       |       |  |    |       |       |       |       |  |     |       |       |       |       |  |
| Actual                                                                                                                                                                                                                                                                                                                                                                                                                                                                                                                                                                         | Predicted        | Count |          |       |                     |           |                 |           |       |           |              |           |                        |    |                |           |          |    |                                                                                                                                                                                                                                                                                                                                                                                                                                 |       |       |          |       |                     |           |                 |           |       |          |              |           |                        |       |                |           |          |     |                                                                                                                                                                                                                                                                                                                                                                                                                                          |       |       |          |  |                                                                                                                                                                                                                                                                                                                                                                                                                                                                                                                                                                                |                  |                 |           |      |           |              |           |                        |           |                |           |          |     |    |    |    |     |  |    |       |       |       |       |  |    |       |       |       |       |  |    |       |       |       |       |  |     |       |       |       |       |  |                                                                                                                                                                                                                                                                                                                                                                                                                                                                                                                                                                                |                  |  |  |  |  |  |        |           |       |  |  |  |     |    |    |    |     |  |    |       |       |       |       |  |    |       |       |       |       |  |    |       |       |       |       |  |     |       |       |       |       |  |
| Day                                                                                                                                                                                                                                                                                                                                                                                                                                                                                                                                                                            | 30               | 60    | 90       | 120   |                     |           |                 |           |       |           |              |           |                        |    |                |           |          |    |                                                                                                                                                                                                                                                                                                                                                                                                                                 |       |       |          |       |                     |           |                 |           |       |          |              |           |                        |       |                |           |          |     |                                                                                                                                                                                                                                                                                                                                                                                                                                          |       |       |          |  |                                                                                                                                                                                                                                                                                                                                                                                                                                                                                                                                                                                |                  |                 |           |      |           |              |           |                        |           |                |           |          |     |    |    |    |     |  |    |       |       |       |       |  |    |       |       |       |       |  |    |       |       |       |       |  |     |       |       |       |       |  |                                                                                                                                                                                                                                                                                                                                                                                                                                                                                                                                                                                |                  |  |  |  |  |  |        |           |       |  |  |  |     |    |    |    |     |  |    |       |       |       |       |  |    |       |       |       |       |  |    |       |       |       |       |  |     |       |       |       |       |  |
| 30                                                                                                                                                                                                                                                                                                                                                                                                                                                                                                                                                                             | 5                | 0     | 0        | 0     |                     |           |                 |           |       |           |              |           |                        |    |                |           |          |    |                                                                                                                                                                                                                                                                                                                                                                                                                                 |       |       |          |       |                     |           |                 |           |       |          |              |           |                        |       |                |           |          |     |                                                                                                                                                                                                                                                                                                                                                                                                                                          |       |       |          |  |                                                                                                                                                                                                                                                                                                                                                                                                                                                                                                                                                                                |                  |                 |           |      |           |              |           |                        |           |                |           |          |     |    |    |    |     |  |    |       |       |       |       |  |    |       |       |       |       |  |    |       |       |       |       |  |     |       |       |       |       |  |                                                                                                                                                                                                                                                                                                                                                                                                                                                                                                                                                                                |                  |  |  |  |  |  |        |           |       |  |  |  |     |    |    |    |     |  |    |       |       |       |       |  |    |       |       |       |       |  |    |       |       |       |       |  |     |       |       |       |       |  |
| 60                                                                                                                                                                                                                                                                                                                                                                                                                                                                                                                                                                             | 0                | 9     | 0        | 0     |                     |           |                 |           |       |           |              |           |                        |    |                |           |          |    |                                                                                                                                                                                                                                                                                                                                                                                                                                 |       |       |          |       |                     |           |                 |           |       |          |              |           |                        |       |                |           |          |     |                                                                                                                                                                                                                                                                                                                                                                                                                                          |       |       |          |  |                                                                                                                                                                                                                                                                                                                                                                                                                                                                                                                                                                                |                  |                 |           |      |           |              |           |                        |           |                |           |          |     |    |    |    |     |  |    |       |       |       |       |  |    |       |       |       |       |  |    |       |       |       |       |  |     |       |       |       |       |  |                                                                                                                                                                                                                                                                                                                                                                                                                                                                                                                                                                                |                  |  |  |  |  |  |        |           |       |  |  |  |     |    |    |    |     |  |    |       |       |       |       |  |    |       |       |       |       |  |    |       |       |       |       |  |     |       |       |       |       |  |
| 90                                                                                                                                                                                                                                                                                                                                                                                                                                                                                                                                                                             | 0                | 0     | 9        | 0     |                     |           |                 |           |       |           |              |           |                        |    |                |           |          |    |                                                                                                                                                                                                                                                                                                                                                                                                                                 |       |       |          |       |                     |           |                 |           |       |          |              |           |                        |       |                |           |          |     |                                                                                                                                                                                                                                                                                                                                                                                                                                          |       |       |          |  |                                                                                                                                                                                                                                                                                                                                                                                                                                                                                                                                                                                |                  |                 |           |      |           |              |           |                        |           |                |           |          |     |    |    |    |     |  |    |       |       |       |       |  |    |       |       |       |       |  |    |       |       |       |       |  |     |       |       |       |       |  |                                                                                                                                                                                                                                                                                                                                                                                                                                                                                                                                                                                |                  |  |  |  |  |  |        |           |       |  |  |  |     |    |    |    |     |  |    |       |       |       |       |  |    |       |       |       |       |  |    |       |       |       |       |  |     |       |       |       |       |  |
| 120                                                                                                                                                                                                                                                                                                                                                                                                                                                                                                                                                                            | 0                | 0     | 0        | 12    |                     |           |                 |           |       |           |              |           |                        |    |                |           |          |    |                                                                                                                                                                                                                                                                                                                                                                                                                                 |       |       |          |       |                     |           |                 |           |       |          |              |           |                        |       |                |           |          |     |                                                                                                                                                                                                                                                                                                                                                                                                                                          |       |       |          |  |                                                                                                                                                                                                                                                                                                                                                                                                                                                                                                                                                                                |                  |                 |           |      |           |              |           |                        |           |                |           |          |     |    |    |    |     |  |    |       |       |       |       |  |    |       |       |       |       |  |    |       |       |       |       |  |     |       |       |       |       |  |                                                                                                                                                                                                                                                                                                                                                                                                                                                                                                                                                                                |                  |  |  |  |  |  |        |           |       |  |  |  |     |    |    |    |     |  |    |       |       |       |       |  |    |       |       |       |       |  |    |       |       |       |       |  |     |       |       |       |       |  |
| Confusion Matrix                                                                                                                                                                                                                                                                                                                                                                                                                                                                                                                                                               |                  |       |          |       |                     |           |                 |           |       |           |              |           |                        |    |                |           |          |    |                                                                                                                                                                                                                                                                                                                                                                                                                                 |       |       |          |       |                     |           |                 |           |       |          |              |           |                        |       |                |           |          |     |                                                                                                                                                                                                                                                                                                                                                                                                                                          |       |       |          |  |                                                                                                                                                                                                                                                                                                                                                                                                                                                                                                                                                                                |                  |                 |           |      |           |              |           |                        |           |                |           |          |     |    |    |    |     |  |    |       |       |       |       |  |    |       |       |       |       |  |    |       |       |       |       |  |     |       |       |       |       |  |                                                                                                                                                                                                                                                                                                                                                                                                                                                                                                                                                                                |                  |  |  |  |  |  |        |           |       |  |  |  |     |    |    |    |     |  |    |       |       |       |       |  |    |       |       |       |       |  |    |       |       |       |       |  |     |       |       |       |       |  |
| Actual                                                                                                                                                                                                                                                                                                                                                                                                                                                                                                                                                                         | Predicted        | Count |          |       |                     |           |                 |           |       |           |              |           |                        |    |                |           |          |    |                                                                                                                                                                                                                                                                                                                                                                                                                                 |       |       |          |       |                     |           |                 |           |       |          |              |           |                        |       |                |           |          |     |                                                                                                                                                                                                                                                                                                                                                                                                                                          |       |       |          |  |                                                                                                                                                                                                                                                                                                                                                                                                                                                                                                                                                                                |                  |                 |           |      |           |              |           |                        |           |                |           |          |     |    |    |    |     |  |    |       |       |       |       |  |    |       |       |       |       |  |    |       |       |       |       |  |     |       |       |       |       |  |                                                                                                                                                                                                                                                                                                                                                                                                                                                                                                                                                                                |                  |  |  |  |  |  |        |           |       |  |  |  |     |    |    |    |     |  |    |       |       |       |       |  |    |       |       |       |       |  |    |       |       |       |       |  |     |       |       |       |       |  |
| Day                                                                                                                                                                                                                                                                                                                                                                                                                                                                                                                                                                            | 30               | 60    | 90       | 120   |                     |           |                 |           |       |           |              |           |                        |    |                |           |          |    |                                                                                                                                                                                                                                                                                                                                                                                                                                 |       |       |          |       |                     |           |                 |           |       |          |              |           |                        |       |                |           |          |     |                                                                                                                                                                                                                                                                                                                                                                                                                                          |       |       |          |  |                                                                                                                                                                                                                                                                                                                                                                                                                                                                                                                                                                                |                  |                 |           |      |           |              |           |                        |           |                |           |          |     |    |    |    |     |  |    |       |       |       |       |  |    |       |       |       |       |  |    |       |       |       |       |  |     |       |       |       |       |  |                                                                                                                                                                                                                                                                                                                                                                                                                                                                                                                                                                                |                  |  |  |  |  |  |        |           |       |  |  |  |     |    |    |    |     |  |    |       |       |       |       |  |    |       |       |       |       |  |    |       |       |       |       |  |     |       |       |       |       |  |
| 30                                                                                                                                                                                                                                                                                                                                                                                                                                                                                                                                                                             | 3                | 0     | 0        | 0     |                     |           |                 |           |       |           |              |           |                        |    |                |           |          |    |                                                                                                                                                                                                                                                                                                                                                                                                                                 |       |       |          |       |                     |           |                 |           |       |          |              |           |                        |       |                |           |          |     |                                                                                                                                                                                                                                                                                                                                                                                                                                          |       |       |          |  |                                                                                                                                                                                                                                                                                                                                                                                                                                                                                                                                                                                |                  |                 |           |      |           |              |           |                        |           |                |           |          |     |    |    |    |     |  |    |       |       |       |       |  |    |       |       |       |       |  |    |       |       |       |       |  |     |       |       |       |       |  |                                                                                                                                                                                                                                                                                                                                                                                                                                                                                                                                                                                |                  |  |  |  |  |  |        |           |       |  |  |  |     |    |    |    |     |  |    |       |       |       |       |  |    |       |       |       |       |  |    |       |       |       |       |  |     |       |       |       |       |  |
| 60                                                                                                                                                                                                                                                                                                                                                                                                                                                                                                                                                                             | 0                | 4     | 0        | 0     |                     |           |                 |           |       |           |              |           |                        |    |                |           |          |    |                                                                                                                                                                                                                                                                                                                                                                                                                                 |       |       |          |       |                     |           |                 |           |       |          |              |           |                        |       |                |           |          |     |                                                                                                                                                                                                                                                                                                                                                                                                                                          |       |       |          |  |                                                                                                                                                                                                                                                                                                                                                                                                                                                                                                                                                                                |                  |                 |           |      |           |              |           |                        |           |                |           |          |     |    |    |    |     |  |    |       |       |       |       |  |    |       |       |       |       |  |    |       |       |       |       |  |     |       |       |       |       |  |                                                                                                                                                                                                                                                                                                                                                                                                                                                                                                                                                                                |                  |  |  |  |  |  |        |           |       |  |  |  |     |    |    |    |     |  |    |       |       |       |       |  |    |       |       |       |       |  |    |       |       |       |       |  |     |       |       |       |       |  |
| 90                                                                                                                                                                                                                                                                                                                                                                                                                                                                                                                                                                             | 0                | 0     | 4        | 0     |                     |           |                 |           |       |           |              |           |                        |    |                |           |          |    |                                                                                                                                                                                                                                                                                                                                                                                                                                 |       |       |          |       |                     |           |                 |           |       |          |              |           |                        |       |                |           |          |     |                                                                                                                                                                                                                                                                                                                                                                                                                                          |       |       |          |  |                                                                                                                                                                                                                                                                                                                                                                                                                                                                                                                                                                                |                  |                 |           |      |           |              |           |                        |           |                |           |          |     |    |    |    |     |  |    |       |       |       |       |  |    |       |       |       |       |  |    |       |       |       |       |  |     |       |       |       |       |  |                                                                                                                                                                                                                                                                                                                                                                                                                                                                                                                                                                                |                  |  |  |  |  |  |        |           |       |  |  |  |     |    |    |    |     |  |    |       |       |       |       |  |    |       |       |       |       |  |    |       |       |       |       |  |     |       |       |       |       |  |
| 120                                                                                                                                                                                                                                                                                                                                                                                                                                                                                                                                                                            | 0                | 0     | 0        | 1     |                     |           |                 |           |       |           |              |           |                        |    |                |           |          |    |                                                                                                                                                                                                                                                                                                                                                                                                                                 |       |       |          |       |                     |           |                 |           |       |          |              |           |                        |       |                |           |          |     |                                                                                                                                                                                                                                                                                                                                                                                                                                          |       |       |          |  |                                                                                                                                                                                                                                                                                                                                                                                                                                                                                                                                                                                |                  |                 |           |      |           |              |           |                        |           |                |           |          |     |    |    |    |     |  |    |       |       |       |       |  |    |       |       |       |       |  |    |       |       |       |       |  |     |       |       |       |       |  |                                                                                                                                                                                                                                                                                                                                                                                                                                                                                                                                                                                |                  |  |  |  |  |  |        |           |       |  |  |  |     |    |    |    |     |  |    |       |       |       |       |  |    |       |       |       |       |  |    |       |       |       |       |  |     |       |       |       |       |  |
| Confusion Matrix                                                                                                                                                                                                                                                                                                                                                                                                                                                                                                                                                               |                  |       |          |       |                     |           |                 |           |       |           |              |           |                        |    |                |           |          |    |                                                                                                                                                                                                                                                                                                                                                                                                                                 |       |       |          |       |                     |           |                 |           |       |          |              |           |                        |       |                |           |          |     |                                                                                                                                                                                                                                                                                                                                                                                                                                          |       |       |          |  |                                                                                                                                                                                                                                                                                                                                                                                                                                                                                                                                                                                |                  |                 |           |      |           |              |           |                        |           |                |           |          |     |    |    |    |     |  |    |       |       |       |       |  |    |       |       |       |       |  |    |       |       |       |       |  |     |       |       |       |       |  |                                                                                                                                                                                                                                                                                                                                                                                                                                                                                                                                                                                |                  |  |  |  |  |  |        |           |       |  |  |  |     |    |    |    |     |  |    |       |       |       |       |  |    |       |       |       |       |  |    |       |       |       |       |  |     |       |       |       |       |  |
| Actual                                                                                                                                                                                                                                                                                                                                                                                                                                                                                                                                                                         | Predicted        | Count |          |       |                     |           |                 |           |       |           |              |           |                        |    |                |           |          |    |                                                                                                                                                                                                                                                                                                                                                                                                                                 |       |       |          |       |                     |           |                 |           |       |          |              |           |                        |       |                |           |          |     |                                                                                                                                                                                                                                                                                                                                                                                                                                          |       |       |          |  |                                                                                                                                                                                                                                                                                                                                                                                                                                                                                                                                                                                |                  |                 |           |      |           |              |           |                        |           |                |           |          |     |    |    |    |     |  |    |       |       |       |       |  |    |       |       |       |       |  |    |       |       |       |       |  |     |       |       |       |       |  |                                                                                                                                                                                                                                                                                                                                                                                                                                                                                                                                                                                |                  |  |  |  |  |  |        |           |       |  |  |  |     |    |    |    |     |  |    |       |       |       |       |  |    |       |       |       |       |  |    |       |       |       |       |  |     |       |       |       |       |  |
| Day                                                                                                                                                                                                                                                                                                                                                                                                                                                                                                                                                                            | 30               | 60    | 90       | 120   |                     |           |                 |           |       |           |              |           |                        |    |                |           |          |    |                                                                                                                                                                                                                                                                                                                                                                                                                                 |       |       |          |       |                     |           |                 |           |       |          |              |           |                        |       |                |           |          |     |                                                                                                                                                                                                                                                                                                                                                                                                                                          |       |       |          |  |                                                                                                                                                                                                                                                                                                                                                                                                                                                                                                                                                                                |                  |                 |           |      |           |              |           |                        |           |                |           |          |     |    |    |    |     |  |    |       |       |       |       |  |    |       |       |       |       |  |    |       |       |       |       |  |     |       |       |       |       |  |                                                                                                                                                                                                                                                                                                                                                                                                                                                                                                                                                                                |                  |  |  |  |  |  |        |           |       |  |  |  |     |    |    |    |     |  |    |       |       |       |       |  |    |       |       |       |       |  |    |       |       |       |       |  |     |       |       |       |       |  |
| 30                                                                                                                                                                                                                                                                                                                                                                                                                                                                                                                                                                             | 5                | 1     | 0        | 0     |                     |           |                 |           |       |           |              |           |                        |    |                |           |          |    |                                                                                                                                                                                                                                                                                                                                                                                                                                 |       |       |          |       |                     |           |                 |           |       |          |              |           |                        |       |                |           |          |     |                                                                                                                                                                                                                                                                                                                                                                                                                                          |       |       |          |  |                                                                                                                                                                                                                                                                                                                                                                                                                                                                                                                                                                                |                  |                 |           |      |           |              |           |                        |           |                |           |          |     |    |    |    |     |  |    |       |       |       |       |  |    |       |       |       |       |  |    |       |       |       |       |  |     |       |       |       |       |  |                                                                                                                                                                                                                                                                                                                                                                                                                                                                                                                                                                                |                  |  |  |  |  |  |        |           |       |  |  |  |     |    |    |    |     |  |    |       |       |       |       |  |    |       |       |       |       |  |    |       |       |       |       |  |     |       |       |       |       |  |
| 60                                                                                                                                                                                                                                                                                                                                                                                                                                                                                                                                                                             | 0                | 2     | 0        | 0     |                     |           |                 |           |       |           |              |           |                        |    |                |           |          |    |                                                                                                                                                                                                                                                                                                                                                                                                                                 |       |       |          |       |                     |           |                 |           |       |          |              |           |                        |       |                |           |          |     |                                                                                                                                                                                                                                                                                                                                                                                                                                          |       |       |          |  |                                                                                                                                                                                                                                                                                                                                                                                                                                                                                                                                                                                |                  |                 |           |      |           |              |           |                        |           |                |           |          |     |    |    |    |     |  |    |       |       |       |       |  |    |       |       |       |       |  |    |       |       |       |       |  |     |       |       |       |       |  |                                                                                                                                                                                                                                                                                                                                                                                                                                                                                                                                                                                |                  |  |  |  |  |  |        |           |       |  |  |  |     |    |    |    |     |  |    |       |       |       |       |  |    |       |       |       |       |  |    |       |       |       |       |  |     |       |       |       |       |  |
| 90                                                                                                                                                                                                                                                                                                                                                                                                                                                                                                                                                                             | 0                | 0     | 2        | 0     |                     |           |                 |           |       |           |              |           |                        |    |                |           |          |    |                                                                                                                                                                                                                                                                                                                                                                                                                                 |       |       |          |       |                     |           |                 |           |       |          |              |           |                        |       |                |           |          |     |                                                                                                                                                                                                                                                                                                                                                                                                                                          |       |       |          |  |                                                                                                                                                                                                                                                                                                                                                                                                                                                                                                                                                                                |                  |                 |           |      |           |              |           |                        |           |                |           |          |     |    |    |    |     |  |    |       |       |       |       |  |    |       |       |       |       |  |    |       |       |       |       |  |     |       |       |       |       |  |                                                                                                                                                                                                                                                                                                                                                                                                                                                                                                                                                                                |                  |  |  |  |  |  |        |           |       |  |  |  |     |    |    |    |     |  |    |       |       |       |       |  |    |       |       |       |       |  |    |       |       |       |       |  |     |       |       |       |       |  |
| 120                                                                                                                                                                                                                                                                                                                                                                                                                                                                                                                                                                            | 0                | 0     | 0        | 1     |                     |           |                 |           |       |           |              |           |                        |    |                |           |          |    |                                                                                                                                                                                                                                                                                                                                                                                                                                 |       |       |          |       |                     |           |                 |           |       |          |              |           |                        |       |                |           |          |     |                                                                                                                                                                                                                                                                                                                                                                                                                                          |       |       |          |  |                                                                                                                                                                                                                                                                                                                                                                                                                                                                                                                                                                                |                  |                 |           |      |           |              |           |                        |           |                |           |          |     |    |    |    |     |  |    |       |       |       |       |  |    |       |       |       |       |  |    |       |       |       |       |  |     |       |       |       |       |  |                                                                                                                                                                                                                                                                                                                                                                                                                                                                                                                                                                                |                  |  |  |  |  |  |        |           |       |  |  |  |     |    |    |    |     |  |    |       |       |       |       |  |    |       |       |       |       |  |    |       |       |       |       |  |     |       |       |       |       |  |
| <table><tr><th colspan="6">Confusion Rates</th></tr><tr><th>Actual</th><th>Predicted</th><th>Rate</th><th></th><th></th><th></th></tr><tr><th>Day</th><th>30</th><th>60</th><th>90</th><th>120</th><th></th></tr><tr><td>30</td><td>1.000</td><td>0.000</td><td>0.000</td><td>0.000</td><td></td></tr><tr><td>60</td><td>0.000</td><td>1.000</td><td>0.000</td><td>0.000</td><td></td></tr><tr><td>90</td><td>0.000</td><td>0.000</td><td>1.000</td><td>0.000</td><td></td></tr><tr><td>120</td><td>0.000</td><td>0.000</td><td>0.000</td><td>1.000</td><td></td></tr></table> | Confusion Rates  |       |          |       |                     |           | Actual          | Predicted | Rate  |           |              |           | Day                    | 30 | 60             | 90        | 120      |    | 30                                                                                                                                                                                                                                                                                                                                                                                                                              | 1.000 | 0.000 | 0.000    | 0.000 |                     | 60        | 0.000           | 1.000     | 0.000 | 0.000    |              | 90        | 0.000                  | 0.000 | 1.000          | 0.000     |          | 120 | 0.000                                                                                                                                                                                                                                                                                                                                                                                                                                    | 0.000 | 0.000 | 1.000    |  | <table><tr><th colspan="6">Confusion Rates</th></tr><tr><th>Actual</th><th>Predicted</th><th>Rate</th><th></th><th></th><th></th></tr><tr><th>Day</th><th>30</th><th>60</th><th>90</th><th>120</th><th></th></tr><tr><td>30</td><td>1.000</td><td>0.000</td><td>0.000</td><td>0.000</td><td></td></tr><tr><td>60</td><td>0.000</td><td>1.000</td><td>0.000</td><td>0.000</td><td></td></tr><tr><td>90</td><td>0.000</td><td>0.000</td><td>1.000</td><td>0.000</td><td></td></tr><tr><td>120</td><td>0.000</td><td>0.000</td><td>0.000</td><td>1.000</td><td></td></tr></table> | Confusion Rates  |                 |           |      |           |              | Actual    | Predicted              | Rate      |                |           |          | Day | 30 | 60 | 90 | 120 |  | 30 | 1.000 | 0.000 | 0.000 | 0.000 |  | 60 | 0.000 | 1.000 | 0.000 | 0.000 |  | 90 | 0.000 | 0.000 | 1.000 | 0.000 |  | 120 | 0.000 | 0.000 | 0.000 | 1.000 |  | <table><tr><th colspan="6">Confusion Rates</th></tr><tr><th>Actual</th><th>Predicted</th><th>Rate</th><th></th><th></th><th></th></tr><tr><th>Day</th><th>30</th><th>60</th><th>90</th><th>120</th><th></th></tr><tr><td>30</td><td>0.833</td><td>0.167</td><td>0.000</td><td>0.000</td><td></td></tr><tr><td>60</td><td>0.000</td><td>1.000</td><td>0.000</td><td>0.000</td><td></td></tr><tr><td>90</td><td>0.000</td><td>0.000</td><td>1.000</td><td>0.000</td><td></td></tr><tr><td>120</td><td>0.000</td><td>0.000</td><td>0.000</td><td>1.000</td><td></td></tr></table> | Confusion Rates  |  |  |  |  |  | Actual | Predicted | Rate  |  |  |  | Day | 30 | 60 | 90 | 120 |  | 30 | 0.833 | 0.167 | 0.000 | 0.000 |  | 60 | 0.000 | 1.000 | 0.000 | 0.000 |  | 90 | 0.000 | 0.000 | 1.000 | 0.000 |  | 120 | 0.000 | 0.000 | 0.000 | 1.000 |  |
| Confusion Rates                                                                                                                                                                                                                                                                                                                                                                                                                                                                                                                                                                |                  |       |          |       |                     |           |                 |           |       |           |              |           |                        |    |                |           |          |    |                                                                                                                                                                                                                                                                                                                                                                                                                                 |       |       |          |       |                     |           |                 |           |       |          |              |           |                        |       |                |           |          |     |                                                                                                                                                                                                                                                                                                                                                                                                                                          |       |       |          |  |                                                                                                                                                                                                                                                                                                                                                                                                                                                                                                                                                                                |                  |                 |           |      |           |              |           |                        |           |                |           |          |     |    |    |    |     |  |    |       |       |       |       |  |    |       |       |       |       |  |    |       |       |       |       |  |     |       |       |       |       |  |                                                                                                                                                                                                                                                                                                                                                                                                                                                                                                                                                                                |                  |  |  |  |  |  |        |           |       |  |  |  |     |    |    |    |     |  |    |       |       |       |       |  |    |       |       |       |       |  |    |       |       |       |       |  |     |       |       |       |       |  |
| Actual                                                                                                                                                                                                                                                                                                                                                                                                                                                                                                                                                                         | Predicted        | Rate  |          |       |                     |           |                 |           |       |           |              |           |                        |    |                |           |          |    |                                                                                                                                                                                                                                                                                                                                                                                                                                 |       |       |          |       |                     |           |                 |           |       |          |              |           |                        |       |                |           |          |     |                                                                                                                                                                                                                                                                                                                                                                                                                                          |       |       |          |  |                                                                                                                                                                                                                                                                                                                                                                                                                                                                                                                                                                                |                  |                 |           |      |           |              |           |                        |           |                |           |          |     |    |    |    |     |  |    |       |       |       |       |  |    |       |       |       |       |  |    |       |       |       |       |  |     |       |       |       |       |  |                                                                                                                                                                                                                                                                                                                                                                                                                                                                                                                                                                                |                  |  |  |  |  |  |        |           |       |  |  |  |     |    |    |    |     |  |    |       |       |       |       |  |    |       |       |       |       |  |    |       |       |       |       |  |     |       |       |       |       |  |
| Day                                                                                                                                                                                                                                                                                                                                                                                                                                                                                                                                                                            | 30               | 60    | 90       | 120   |                     |           |                 |           |       |           |              |           |                        |    |                |           |          |    |                                                                                                                                                                                                                                                                                                                                                                                                                                 |       |       |          |       |                     |           |                 |           |       |          |              |           |                        |       |                |           |          |     |                                                                                                                                                                                                                                                                                                                                                                                                                                          |       |       |          |  |                                                                                                                                                                                                                                                                                                                                                                                                                                                                                                                                                                                |                  |                 |           |      |           |              |           |                        |           |                |           |          |     |    |    |    |     |  |    |       |       |       |       |  |    |       |       |       |       |  |    |       |       |       |       |  |     |       |       |       |       |  |                                                                                                                                                                                                                                                                                                                                                                                                                                                                                                                                                                                |                  |  |  |  |  |  |        |           |       |  |  |  |     |    |    |    |     |  |    |       |       |       |       |  |    |       |       |       |       |  |    |       |       |       |       |  |     |       |       |       |       |  |
| 30                                                                                                                                                                                                                                                                                                                                                                                                                                                                                                                                                                             | 1.000            | 0.000 | 0.000    | 0.000 |                     |           |                 |           |       |           |              |           |                        |    |                |           |          |    |                                                                                                                                                                                                                                                                                                                                                                                                                                 |       |       |          |       |                     |           |                 |           |       |          |              |           |                        |       |                |           |          |     |                                                                                                                                                                                                                                                                                                                                                                                                                                          |       |       |          |  |                                                                                                                                                                                                                                                                                                                                                                                                                                                                                                                                                                                |                  |                 |           |      |           |              |           |                        |           |                |           |          |     |    |    |    |     |  |    |       |       |       |       |  |    |       |       |       |       |  |    |       |       |       |       |  |     |       |       |       |       |  |                                                                                                                                                                                                                                                                                                                                                                                                                                                                                                                                                                                |                  |  |  |  |  |  |        |           |       |  |  |  |     |    |    |    |     |  |    |       |       |       |       |  |    |       |       |       |       |  |    |       |       |       |       |  |     |       |       |       |       |  |
| 60                                                                                                                                                                                                                                                                                                                                                                                                                                                                                                                                                                             | 0.000            | 1.000 | 0.000    | 0.000 |                     |           |                 |           |       |           |              |           |                        |    |                |           |          |    |                                                                                                                                                                                                                                                                                                                                                                                                                                 |       |       |          |       |                     |           |                 |           |       |          |              |           |                        |       |                |           |          |     |                                                                                                                                                                                                                                                                                                                                                                                                                                          |       |       |          |  |                                                                                                                                                                                                                                                                                                                                                                                                                                                                                                                                                                                |                  |                 |           |      |           |              |           |                        |           |                |           |          |     |    |    |    |     |  |    |       |       |       |       |  |    |       |       |       |       |  |    |       |       |       |       |  |     |       |       |       |       |  |                                                                                                                                                                                                                                                                                                                                                                                                                                                                                                                                                                                |                  |  |  |  |  |  |        |           |       |  |  |  |     |    |    |    |     |  |    |       |       |       |       |  |    |       |       |       |       |  |    |       |       |       |       |  |     |       |       |       |       |  |
| 90                                                                                                                                                                                                                                                                                                                                                                                                                                                                                                                                                                             | 0.000            | 0.000 | 1.000    | 0.000 |                     |           |                 |           |       |           |              |           |                        |    |                |           |          |    |                                                                                                                                                                                                                                                                                                                                                                                                                                 |       |       |          |       |                     |           |                 |           |       |          |              |           |                        |       |                |           |          |     |                                                                                                                                                                                                                                                                                                                                                                                                                                          |       |       |          |  |                                                                                                                                                                                                                                                                                                                                                                                                                                                                                                                                                                                |                  |                 |           |      |           |              |           |                        |           |                |           |          |     |    |    |    |     |  |    |       |       |       |       |  |    |       |       |       |       |  |    |       |       |       |       |  |     |       |       |       |       |  |                                                                                                                                                                                                                                                                                                                                                                                                                                                                                                                                                                                |                  |  |  |  |  |  |        |           |       |  |  |  |     |    |    |    |     |  |    |       |       |       |       |  |    |       |       |       |       |  |    |       |       |       |       |  |     |       |       |       |       |  |
| 120                                                                                                                                                                                                                                                                                                                                                                                                                                                                                                                                                                            | 0.000            | 0.000 | 0.000    | 1.000 |                     |           |                 |           |       |           |              |           |                        |    |                |           |          |    |                                                                                                                                                                                                                                                                                                                                                                                                                                 |       |       |          |       |                     |           |                 |           |       |          |              |           |                        |       |                |           |          |     |                                                                                                                                                                                                                                                                                                                                                                                                                                          |       |       |          |  |                                                                                                                                                                                                                                                                                                                                                                                                                                                                                                                                                                                |                  |                 |           |      |           |              |           |                        |           |                |           |          |     |    |    |    |     |  |    |       |       |       |       |  |    |       |       |       |       |  |    |       |       |       |       |  |     |       |       |       |       |  |                                                                                                                                                                                                                                                                                                                                                                                                                                                                                                                                                                                |                  |  |  |  |  |  |        |           |       |  |  |  |     |    |    |    |     |  |    |       |       |       |       |  |    |       |       |       |       |  |    |       |       |       |       |  |     |       |       |       |       |  |
| Confusion Rates                                                                                                                                                                                                                                                                                                                                                                                                                                                                                                                                                                |                  |       |          |       |                     |           |                 |           |       |           |              |           |                        |    |                |           |          |    |                                                                                                                                                                                                                                                                                                                                                                                                                                 |       |       |          |       |                     |           |                 |           |       |          |              |           |                        |       |                |           |          |     |                                                                                                                                                                                                                                                                                                                                                                                                                                          |       |       |          |  |                                                                                                                                                                                                                                                                                                                                                                                                                                                                                                                                                                                |                  |                 |           |      |           |              |           |                        |           |                |           |          |     |    |    |    |     |  |    |       |       |       |       |  |    |       |       |       |       |  |    |       |       |       |       |  |     |       |       |       |       |  |                                                                                                                                                                                                                                                                                                                                                                                                                                                                                                                                                                                |                  |  |  |  |  |  |        |           |       |  |  |  |     |    |    |    |     |  |    |       |       |       |       |  |    |       |       |       |       |  |    |       |       |       |       |  |     |       |       |       |       |  |
| Actual                                                                                                                                                                                                                                                                                                                                                                                                                                                                                                                                                                         | Predicted        | Rate  |          |       |                     |           |                 |           |       |           |              |           |                        |    |                |           |          |    |                                                                                                                                                                                                                                                                                                                                                                                                                                 |       |       |          |       |                     |           |                 |           |       |          |              |           |                        |       |                |           |          |     |                                                                                                                                                                                                                                                                                                                                                                                                                                          |       |       |          |  |                                                                                                                                                                                                                                                                                                                                                                                                                                                                                                                                                                                |                  |                 |           |      |           |              |           |                        |           |                |           |          |     |    |    |    |     |  |    |       |       |       |       |  |    |       |       |       |       |  |    |       |       |       |       |  |     |       |       |       |       |  |                                                                                                                                                                                                                                                                                                                                                                                                                                                                                                                                                                                |                  |  |  |  |  |  |        |           |       |  |  |  |     |    |    |    |     |  |    |       |       |       |       |  |    |       |       |       |       |  |    |       |       |       |       |  |     |       |       |       |       |  |
| Day                                                                                                                                                                                                                                                                                                                                                                                                                                                                                                                                                                            | 30               | 60    | 90       | 120   |                     |           |                 |           |       |           |              |           |                        |    |                |           |          |    |                                                                                                                                                                                                                                                                                                                                                                                                                                 |       |       |          |       |                     |           |                 |           |       |          |              |           |                        |       |                |           |          |     |                                                                                                                                                                                                                                                                                                                                                                                                                                          |       |       |          |  |                                                                                                                                                                                                                                                                                                                                                                                                                                                                                                                                                                                |                  |                 |           |      |           |              |           |                        |           |                |           |          |     |    |    |    |     |  |    |       |       |       |       |  |    |       |       |       |       |  |    |       |       |       |       |  |     |       |       |       |       |  |                                                                                                                                                                                                                                                                                                                                                                                                                                                                                                                                                                                |                  |  |  |  |  |  |        |           |       |  |  |  |     |    |    |    |     |  |    |       |       |       |       |  |    |       |       |       |       |  |    |       |       |       |       |  |     |       |       |       |       |  |
| 30                                                                                                                                                                                                                                                                                                                                                                                                                                                                                                                                                                             | 1.000            | 0.000 | 0.000    | 0.000 |                     |           |                 |           |       |           |              |           |                        |    |                |           |          |    |                                                                                                                                                                                                                                                                                                                                                                                                                                 |       |       |          |       |                     |           |                 |           |       |          |              |           |                        |       |                |           |          |     |                                                                                                                                                                                                                                                                                                                                                                                                                                          |       |       |          |  |                                                                                                                                                                                                                                                                                                                                                                                                                                                                                                                                                                                |                  |                 |           |      |           |              |           |                        |           |                |           |          |     |    |    |    |     |  |    |       |       |       |       |  |    |       |       |       |       |  |    |       |       |       |       |  |     |       |       |       |       |  |                                                                                                                                                                                                                                                                                                                                                                                                                                                                                                                                                                                |                  |  |  |  |  |  |        |           |       |  |  |  |     |    |    |    |     |  |    |       |       |       |       |  |    |       |       |       |       |  |    |       |       |       |       |  |     |       |       |       |       |  |
| 60                                                                                                                                                                                                                                                                                                                                                                                                                                                                                                                                                                             | 0.000            | 1.000 | 0.000    | 0.000 |                     |           |                 |           |       |           |              |           |                        |    |                |           |          |    |                                                                                                                                                                                                                                                                                                                                                                                                                                 |       |       |          |       |                     |           |                 |           |       |          |              |           |                        |       |                |           |          |     |                                                                                                                                                                                                                                                                                                                                                                                                                                          |       |       |          |  |                                                                                                                                                                                                                                                                                                                                                                                                                                                                                                                                                                                |                  |                 |           |      |           |              |           |                        |           |                |           |          |     |    |    |    |     |  |    |       |       |       |       |  |    |       |       |       |       |  |    |       |       |       |       |  |     |       |       |       |       |  |                                                                                                                                                                                                                                                                                                                                                                                                                                                                                                                                                                                |                  |  |  |  |  |  |        |           |       |  |  |  |     |    |    |    |     |  |    |       |       |       |       |  |    |       |       |       |       |  |    |       |       |       |       |  |     |       |       |       |       |  |
| 90                                                                                                                                                                                                                                                                                                                                                                                                                                                                                                                                                                             | 0.000            | 0.000 | 1.000    | 0.000 |                     |           |                 |           |       |           |              |           |                        |    |                |           |          |    |                                                                                                                                                                                                                                                                                                                                                                                                                                 |       |       |          |       |                     |           |                 |           |       |          |              |           |                        |       |                |           |          |     |                                                                                                                                                                                                                                                                                                                                                                                                                                          |       |       |          |  |                                                                                                                                                                                                                                                                                                                                                                                                                                                                                                                                                                                |                  |                 |           |      |           |              |           |                        |           |                |           |          |     |    |    |    |     |  |    |       |       |       |       |  |    |       |       |       |       |  |    |       |       |       |       |  |     |       |       |       |       |  |                                                                                                                                                                                                                                                                                                                                                                                                                                                                                                                                                                                |                  |  |  |  |  |  |        |           |       |  |  |  |     |    |    |    |     |  |    |       |       |       |       |  |    |       |       |       |       |  |    |       |       |       |       |  |     |       |       |       |       |  |
| 120                                                                                                                                                                                                                                                                                                                                                                                                                                                                                                                                                                            | 0.000            | 0.000 | 0.000    | 1.000 |                     |           |                 |           |       |           |              |           |                        |    |                |           |          |    |                                                                                                                                                                                                                                                                                                                                                                                                                                 |       |       |          |       |                     |           |                 |           |       |          |              |           |                        |       |                |           |          |     |                                                                                                                                                                                                                                                                                                                                                                                                                                          |       |       |          |  |                                                                                                                                                                                                                                                                                                                                                                                                                                                                                                                                                                                |                  |                 |           |      |           |              |           |                        |           |                |           |          |     |    |    |    |     |  |    |       |       |       |       |  |    |       |       |       |       |  |    |       |       |       |       |  |     |       |       |       |       |  |                                                                                                                                                                                                                                                                                                                                                                                                                                                                                                                                                                                |                  |  |  |  |  |  |        |           |       |  |  |  |     |    |    |    |     |  |    |       |       |       |       |  |    |       |       |       |       |  |    |       |       |       |       |  |     |       |       |       |       |  |
| Confusion Rates                                                                                                                                                                                                                                                                                                                                                                                                                                                                                                                                                                |                  |       |          |       |                     |           |                 |           |       |           |              |           |                        |    |                |           |          |    |                                                                                                                                                                                                                                                                                                                                                                                                                                 |       |       |          |       |                     |           |                 |           |       |          |              |           |                        |       |                |           |          |     |                                                                                                                                                                                                                                                                                                                                                                                                                                          |       |       |          |  |                                                                                                                                                                                                                                                                                                                                                                                                                                                                                                                                                                                |                  |                 |           |      |           |              |           |                        |           |                |           |          |     |    |    |    |     |  |    |       |       |       |       |  |    |       |       |       |       |  |    |       |       |       |       |  |     |       |       |       |       |  |                                                                                                                                                                                                                                                                                                                                                                                                                                                                                                                                                                                |                  |  |  |  |  |  |        |           |       |  |  |  |     |    |    |    |     |  |    |       |       |       |       |  |    |       |       |       |       |  |    |       |       |       |       |  |     |       |       |       |       |  |
| Actual                                                                                                                                                                                                                                                                                                                                                                                                                                                                                                                                                                         | Predicted        | Rate  |          |       |                     |           |                 |           |       |           |              |           |                        |    |                |           |          |    |                                                                                                                                                                                                                                                                                                                                                                                                                                 |       |       |          |       |                     |           |                 |           |       |          |              |           |                        |       |                |           |          |     |                                                                                                                                                                                                                                                                                                                                                                                                                                          |       |       |          |  |                                                                                                                                                                                                                                                                                                                                                                                                                                                                                                                                                                                |                  |                 |           |      |           |              |           |                        |           |                |           |          |     |    |    |    |     |  |    |       |       |       |       |  |    |       |       |       |       |  |    |       |       |       |       |  |     |       |       |       |       |  |                                                                                                                                                                                                                                                                                                                                                                                                                                                                                                                                                                                |                  |  |  |  |  |  |        |           |       |  |  |  |     |    |    |    |     |  |    |       |       |       |       |  |    |       |       |       |       |  |    |       |       |       |       |  |     |       |       |       |       |  |
| Day                                                                                                                                                                                                                                                                                                                                                                                                                                                                                                                                                                            | 30               | 60    | 90       | 120   |                     |           |                 |           |       |           |              |           |                        |    |                |           |          |    |                                                                                                                                                                                                                                                                                                                                                                                                                                 |       |       |          |       |                     |           |                 |           |       |          |              |           |                        |       |                |           |          |     |                                                                                                                                                                                                                                                                                                                                                                                                                                          |       |       |          |  |                                                                                                                                                                                                                                                                                                                                                                                                                                                                                                                                                                                |                  |                 |           |      |           |              |           |                        |           |                |           |          |     |    |    |    |     |  |    |       |       |       |       |  |    |       |       |       |       |  |    |       |       |       |       |  |     |       |       |       |       |  |                                                                                                                                                                                                                                                                                                                                                                                                                                                                                                                                                                                |                  |  |  |  |  |  |        |           |       |  |  |  |     |    |    |    |     |  |    |       |       |       |       |  |    |       |       |       |       |  |    |       |       |       |       |  |     |       |       |       |       |  |
| 30                                                                                                                                                                                                                                                                                                                                                                                                                                                                                                                                                                             | 0.833            | 0.167 | 0.000    | 0.000 |                     |           |                 |           |       |           |              |           |                        |    |                |           |          |    |                                                                                                                                                                                                                                                                                                                                                                                                                                 |       |       |          |       |                     |           |                 |           |       |          |              |           |                        |       |                |           |          |     |                                                                                                                                                                                                                                                                                                                                                                                                                                          |       |       |          |  |                                                                                                                                                                                                                                                                                                                                                                                                                                                                                                                                                                                |                  |                 |           |      |           |              |           |                        |           |                |           |          |     |    |    |    |     |  |    |       |       |       |       |  |    |       |       |       |       |  |    |       |       |       |       |  |     |       |       |       |       |  |                                                                                                                                                                                                                                                                                                                                                                                                                                                                                                                                                                                |                  |  |  |  |  |  |        |           |       |  |  |  |     |    |    |    |     |  |    |       |       |       |       |  |    |       |       |       |       |  |    |       |       |       |       |  |     |       |       |       |       |  |
| 60                                                                                                                                                                                                                                                                                                                                                                                                                                                                                                                                                                             | 0.000            | 1.000 | 0.000    | 0.000 |                     |           |                 |           |       |           |              |           |                        |    |                |           |          |    |                                                                                                                                                                                                                                                                                                                                                                                                                                 |       |       |          |       |                     |           |                 |           |       |          |              |           |                        |       |                |           |          |     |                                                                                                                                                                                                                                                                                                                                                                                                                                          |       |       |          |  |                                                                                                                                                                                                                                                                                                                                                                                                                                                                                                                                                                                |                  |                 |           |      |           |              |           |                        |           |                |           |          |     |    |    |    |     |  |    |       |       |       |       |  |    |       |       |       |       |  |    |       |       |       |       |  |     |       |       |       |       |  |                                                                                                                                                                                                                                                                                                                                                                                                                                                                                                                                                                                |                  |  |  |  |  |  |        |           |       |  |  |  |     |    |    |    |     |  |    |       |       |       |       |  |    |       |       |       |       |  |    |       |       |       |       |  |     |       |       |       |       |  |
| 90                                                                                                                                                                                                                                                                                                                                                                                                                                                                                                                                                                             | 0.000            | 0.000 | 1.000    | 0.000 |                     |           |                 |           |       |           |              |           |                        |    |                |           |          |    |                                                                                                                                                                                                                                                                                                                                                                                                                                 |       |       |          |       |                     |           |                 |           |       |          |              |           |                        |       |                |           |          |     |                                                                                                                                                                                                                                                                                                                                                                                                                                          |       |       |          |  |                                                                                                                                                                                                                                                                                                                                                                                                                                                                                                                                                                                |                  |                 |           |      |           |              |           |                        |           |                |           |          |     |    |    |    |     |  |    |       |       |       |       |  |    |       |       |       |       |  |    |       |       |       |       |  |     |       |       |       |       |  |                                                                                                                                                                                                                                                                                                                                                                                                                                                                                                                                                                                |                  |  |  |  |  |  |        |           |       |  |  |  |     |    |    |    |     |  |    |       |       |       |       |  |    |       |       |       |       |  |    |       |       |       |       |  |     |       |       |       |       |  |
| 120                                                                                                                                                                                                                                                                                                                                                                                                                                                                                                                                                                            | 0.000            | 0.000 | 0.000    | 1.000 |                     |           |                 |           |       |           |              |           |                        |    |                |           |          |    |                                                                                                                                                                                                                                                                                                                                                                                                                                 |       |       |          |       |                     |           |                 |           |       |          |              |           |                        |       |                |           |          |     |                                                                                                                                                                                                                                                                                                                                                                                                                                          |       |       |          |  |                                                                                                                                                                                                                                                                                                                                                                                                                                                                                                                                                                                |                  |                 |           |      |           |              |           |                        |           |                |           |          |     |    |    |    |     |  |    |       |       |       |       |  |    |       |       |       |       |  |    |       |       |       |       |  |     |       |       |       |       |  |                                                                                                                                                                                                                                                                                                                                                                                                                                                                                                                                                                                |                  |  |  |  |  |  |        |           |       |  |  |  |     |    |    |    |     |  |    |       |       |       |       |  |    |       |       |       |       |  |    |       |       |       |       |  |     |       |       |       |       |  |

Neural

Validation Column: Validation0.6

(B)

Model NTanH(3)NBoost(10)

| Training                                                                                                                                                                                                                                                                                                                                                                                                                             | Validation       | Test  |          |       |                     |                 |                 |           |         |           |              |           |                        |       |                |           |          |       |                                                                                                                                                                                                                                                                                                                                                                                                                                     |         |                                                                                                                                                                                                                                                                                                   |                  |       |                     |          |                 |                 |      |           |              |           |                        |   |                |           |          |    |                                                                                                                                                                                                                                                                                                                                                                                                                                     |         |       |          |                                                                                                                                                                                                                                                                                                   |                     |           |                 |           |        |                 |              |           |                        |    |                |           |          |       |       |  |    |       |       |  |
|--------------------------------------------------------------------------------------------------------------------------------------------------------------------------------------------------------------------------------------------------------------------------------------------------------------------------------------------------------------------------------------------------------------------------------------|------------------|-------|----------|-------|---------------------|-----------------|-----------------|-----------|---------|-----------|--------------|-----------|------------------------|-------|----------------|-----------|----------|-------|-------------------------------------------------------------------------------------------------------------------------------------------------------------------------------------------------------------------------------------------------------------------------------------------------------------------------------------------------------------------------------------------------------------------------------------|---------|---------------------------------------------------------------------------------------------------------------------------------------------------------------------------------------------------------------------------------------------------------------------------------------------------|------------------|-------|---------------------|----------|-----------------|-----------------|------|-----------|--------------|-----------|------------------------|---|----------------|-----------|----------|----|-------------------------------------------------------------------------------------------------------------------------------------------------------------------------------------------------------------------------------------------------------------------------------------------------------------------------------------------------------------------------------------------------------------------------------------|---------|-------|----------|---------------------------------------------------------------------------------------------------------------------------------------------------------------------------------------------------------------------------------------------------------------------------------------------------|---------------------|-----------|-----------------|-----------|--------|-----------------|--------------|-----------|------------------------|----|----------------|-----------|----------|-------|-------|--|----|-------|-------|--|
| <table><tr><th>Variety</th><th></th></tr><tr><td>Measures</td><td>Value</td></tr><tr><td>Generalized RSquare</td><td>0.9999956</td></tr><tr><td>Entropy RSquare</td><td>0.9999912</td></tr><tr><td>RMSE</td><td>1.4853e-5</td></tr><tr><td>Mean Abs Dev</td><td>5.4621e-6</td></tr><tr><td>Misclassification Rate</td><td>0</td></tr><tr><td>-LogLikelihood</td><td>0.0001912</td></tr><tr><td>Sum Freq</td><td>35</td></tr></table> | Variety          |       | Measures | Value | Generalized RSquare | 0.9999956       | Entropy RSquare | 0.9999912 | RMSE    | 1.4853e-5 | Mean Abs Dev | 5.4621e-6 | Misclassification Rate | 0     | -LogLikelihood | 0.0001912 | Sum Freq | 35    | <table><tr><th>Variety</th><th></th></tr><tr><td>Measures</td><td>Value</td></tr><tr><td>Generalized RSquare</td><td>0.999931</td></tr><tr><td>Entropy RSquare</td><td>0.9998507</td></tr><tr><td>RMSE</td><td>0.0002302</td></tr><tr><td>Mean Abs Dev</td><td>0.0001034</td></tr><tr><td>Misclassification Rate</td><td>0</td></tr><tr><td>-LogLikelihood</td><td>0.0012416</td></tr><tr><td>Sum Freq</td><td>12</td></tr></table> | Variety |                                                                                                                                                                                                                                                                                                   | Measures         | Value | Generalized RSquare | 0.999931 | Entropy RSquare | 0.9998507       | RMSE | 0.0002302 | Mean Abs Dev | 0.0001034 | Misclassification Rate | 0 | -LogLikelihood | 0.0012416 | Sum Freq | 12 | <table><tr><th>Variety</th><th></th></tr><tr><td>Measures</td><td>Value</td></tr><tr><td>Generalized RSquare</td><td>0.9996669</td></tr><tr><td>Entropy RSquare</td><td>0.9994448</td></tr><tr><td>RMSE</td><td>0.000478</td></tr><tr><td>Mean Abs Dev</td><td>0.0002631</td></tr><tr><td>Misclassification Rate</td><td>0</td></tr><tr><td>-LogLikelihood</td><td>0.0028959</td></tr><tr><td>Sum Freq</td><td>11</td></tr></table> | Variety |       | Measures | Value                                                                                                                                                                                                                                                                                             | Generalized RSquare | 0.9996669 | Entropy RSquare | 0.9994448 | RMSE   | 0.000478        | Mean Abs Dev | 0.0002631 | Misclassification Rate | 0  | -LogLikelihood | 0.0028959 | Sum Freq | 11    |       |  |    |       |       |  |
| Variety                                                                                                                                                                                                                                                                                                                                                                                                                              |                  |       |          |       |                     |                 |                 |           |         |           |              |           |                        |       |                |           |          |       |                                                                                                                                                                                                                                                                                                                                                                                                                                     |         |                                                                                                                                                                                                                                                                                                   |                  |       |                     |          |                 |                 |      |           |              |           |                        |   |                |           |          |    |                                                                                                                                                                                                                                                                                                                                                                                                                                     |         |       |          |                                                                                                                                                                                                                                                                                                   |                     |           |                 |           |        |                 |              |           |                        |    |                |           |          |       |       |  |    |       |       |  |
| Measures                                                                                                                                                                                                                                                                                                                                                                                                                             | Value            |       |          |       |                     |                 |                 |           |         |           |              |           |                        |       |                |           |          |       |                                                                                                                                                                                                                                                                                                                                                                                                                                     |         |                                                                                                                                                                                                                                                                                                   |                  |       |                     |          |                 |                 |      |           |              |           |                        |   |                |           |          |    |                                                                                                                                                                                                                                                                                                                                                                                                                                     |         |       |          |                                                                                                                                                                                                                                                                                                   |                     |           |                 |           |        |                 |              |           |                        |    |                |           |          |       |       |  |    |       |       |  |
| Generalized RSquare                                                                                                                                                                                                                                                                                                                                                                                                                  | 0.9999956        |       |          |       |                     |                 |                 |           |         |           |              |           |                        |       |                |           |          |       |                                                                                                                                                                                                                                                                                                                                                                                                                                     |         |                                                                                                                                                                                                                                                                                                   |                  |       |                     |          |                 |                 |      |           |              |           |                        |   |                |           |          |    |                                                                                                                                                                                                                                                                                                                                                                                                                                     |         |       |          |                                                                                                                                                                                                                                                                                                   |                     |           |                 |           |        |                 |              |           |                        |    |                |           |          |       |       |  |    |       |       |  |
| Entropy RSquare                                                                                                                                                                                                                                                                                                                                                                                                                      | 0.9999912        |       |          |       |                     |                 |                 |           |         |           |              |           |                        |       |                |           |          |       |                                                                                                                                                                                                                                                                                                                                                                                                                                     |         |                                                                                                                                                                                                                                                                                                   |                  |       |                     |          |                 |                 |      |           |              |           |                        |   |                |           |          |    |                                                                                                                                                                                                                                                                                                                                                                                                                                     |         |       |          |                                                                                                                                                                                                                                                                                                   |                     |           |                 |           |        |                 |              |           |                        |    |                |           |          |       |       |  |    |       |       |  |
| RMSE                                                                                                                                                                                                                                                                                                                                                                                                                                 | 1.4853e-5        |       |          |       |                     |                 |                 |           |         |           |              |           |                        |       |                |           |          |       |                                                                                                                                                                                                                                                                                                                                                                                                                                     |         |                                                                                                                                                                                                                                                                                                   |                  |       |                     |          |                 |                 |      |           |              |           |                        |   |                |           |          |    |                                                                                                                                                                                                                                                                                                                                                                                                                                     |         |       |          |                                                                                                                                                                                                                                                                                                   |                     |           |                 |           |        |                 |              |           |                        |    |                |           |          |       |       |  |    |       |       |  |
| Mean Abs Dev                                                                                                                                                                                                                                                                                                                                                                                                                         | 5.4621e-6        |       |          |       |                     |                 |                 |           |         |           |              |           |                        |       |                |           |          |       |                                                                                                                                                                                                                                                                                                                                                                                                                                     |         |                                                                                                                                                                                                                                                                                                   |                  |       |                     |          |                 |                 |      |           |              |           |                        |   |                |           |          |    |                                                                                                                                                                                                                                                                                                                                                                                                                                     |         |       |          |                                                                                                                                                                                                                                                                                                   |                     |           |                 |           |        |                 |              |           |                        |    |                |           |          |       |       |  |    |       |       |  |
| Misclassification Rate                                                                                                                                                                                                                                                                                                                                                                                                               | 0                |       |          |       |                     |                 |                 |           |         |           |              |           |                        |       |                |           |          |       |                                                                                                                                                                                                                                                                                                                                                                                                                                     |         |                                                                                                                                                                                                                                                                                                   |                  |       |                     |          |                 |                 |      |           |              |           |                        |   |                |           |          |    |                                                                                                                                                                                                                                                                                                                                                                                                                                     |         |       |          |                                                                                                                                                                                                                                                                                                   |                     |           |                 |           |        |                 |              |           |                        |    |                |           |          |       |       |  |    |       |       |  |
| -LogLikelihood                                                                                                                                                                                                                                                                                                                                                                                                                       | 0.0001912        |       |          |       |                     |                 |                 |           |         |           |              |           |                        |       |                |           |          |       |                                                                                                                                                                                                                                                                                                                                                                                                                                     |         |                                                                                                                                                                                                                                                                                                   |                  |       |                     |          |                 |                 |      |           |              |           |                        |   |                |           |          |    |                                                                                                                                                                                                                                                                                                                                                                                                                                     |         |       |          |                                                                                                                                                                                                                                                                                                   |                     |           |                 |           |        |                 |              |           |                        |    |                |           |          |       |       |  |    |       |       |  |
| Sum Freq                                                                                                                                                                                                                                                                                                                                                                                                                             | 35               |       |          |       |                     |                 |                 |           |         |           |              |           |                        |       |                |           |          |       |                                                                                                                                                                                                                                                                                                                                                                                                                                     |         |                                                                                                                                                                                                                                                                                                   |                  |       |                     |          |                 |                 |      |           |              |           |                        |   |                |           |          |    |                                                                                                                                                                                                                                                                                                                                                                                                                                     |         |       |          |                                                                                                                                                                                                                                                                                                   |                     |           |                 |           |        |                 |              |           |                        |    |                |           |          |       |       |  |    |       |       |  |
| Variety                                                                                                                                                                                                                                                                                                                                                                                                                              |                  |       |          |       |                     |                 |                 |           |         |           |              |           |                        |       |                |           |          |       |                                                                                                                                                                                                                                                                                                                                                                                                                                     |         |                                                                                                                                                                                                                                                                                                   |                  |       |                     |          |                 |                 |      |           |              |           |                        |   |                |           |          |    |                                                                                                                                                                                                                                                                                                                                                                                                                                     |         |       |          |                                                                                                                                                                                                                                                                                                   |                     |           |                 |           |        |                 |              |           |                        |    |                |           |          |       |       |  |    |       |       |  |
| Measures                                                                                                                                                                                                                                                                                                                                                                                                                             | Value            |       |          |       |                     |                 |                 |           |         |           |              |           |                        |       |                |           |          |       |                                                                                                                                                                                                                                                                                                                                                                                                                                     |         |                                                                                                                                                                                                                                                                                                   |                  |       |                     |          |                 |                 |      |           |              |           |                        |   |                |           |          |    |                                                                                                                                                                                                                                                                                                                                                                                                                                     |         |       |          |                                                                                                                                                                                                                                                                                                   |                     |           |                 |           |        |                 |              |           |                        |    |                |           |          |       |       |  |    |       |       |  |
| Generalized RSquare                                                                                                                                                                                                                                                                                                                                                                                                                  | 0.999931         |       |          |       |                     |                 |                 |           |         |           |              |           |                        |       |                |           |          |       |                                                                                                                                                                                                                                                                                                                                                                                                                                     |         |                                                                                                                                                                                                                                                                                                   |                  |       |                     |          |                 |                 |      |           |              |           |                        |   |                |           |          |    |                                                                                                                                                                                                                                                                                                                                                                                                                                     |         |       |          |                                                                                                                                                                                                                                                                                                   |                     |           |                 |           |        |                 |              |           |                        |    |                |           |          |       |       |  |    |       |       |  |
| Entropy RSquare                                                                                                                                                                                                                                                                                                                                                                                                                      | 0.9998507        |       |          |       |                     |                 |                 |           |         |           |              |           |                        |       |                |           |          |       |                                                                                                                                                                                                                                                                                                                                                                                                                                     |         |                                                                                                                                                                                                                                                                                                   |                  |       |                     |          |                 |                 |      |           |              |           |                        |   |                |           |          |    |                                                                                                                                                                                                                                                                                                                                                                                                                                     |         |       |          |                                                                                                                                                                                                                                                                                                   |                     |           |                 |           |        |                 |              |           |                        |    |                |           |          |       |       |  |    |       |       |  |
| RMSE                                                                                                                                                                                                                                                                                                                                                                                                                                 | 0.0002302        |       |          |       |                     |                 |                 |           |         |           |              |           |                        |       |                |           |          |       |                                                                                                                                                                                                                                                                                                                                                                                                                                     |         |                                                                                                                                                                                                                                                                                                   |                  |       |                     |          |                 |                 |      |           |              |           |                        |   |                |           |          |    |                                                                                                                                                                                                                                                                                                                                                                                                                                     |         |       |          |                                                                                                                                                                                                                                                                                                   |                     |           |                 |           |        |                 |              |           |                        |    |                |           |          |       |       |  |    |       |       |  |
| Mean Abs Dev                                                                                                                                                                                                                                                                                                                                                                                                                         | 0.0001034        |       |          |       |                     |                 |                 |           |         |           |              |           |                        |       |                |           |          |       |                                                                                                                                                                                                                                                                                                                                                                                                                                     |         |                                                                                                                                                                                                                                                                                                   |                  |       |                     |          |                 |                 |      |           |              |           |                        |   |                |           |          |    |                                                                                                                                                                                                                                                                                                                                                                                                                                     |         |       |          |                                                                                                                                                                                                                                                                                                   |                     |           |                 |           |        |                 |              |           |                        |    |                |           |          |       |       |  |    |       |       |  |
| Misclassification Rate                                                                                                                                                                                                                                                                                                                                                                                                               | 0                |       |          |       |                     |                 |                 |           |         |           |              |           |                        |       |                |           |          |       |                                                                                                                                                                                                                                                                                                                                                                                                                                     |         |                                                                                                                                                                                                                                                                                                   |                  |       |                     |          |                 |                 |      |           |              |           |                        |   |                |           |          |    |                                                                                                                                                                                                                                                                                                                                                                                                                                     |         |       |          |                                                                                                                                                                                                                                                                                                   |                     |           |                 |           |        |                 |              |           |                        |    |                |           |          |       |       |  |    |       |       |  |
| -LogLikelihood                                                                                                                                                                                                                                                                                                                                                                                                                       | 0.0012416        |       |          |       |                     |                 |                 |           |         |           |              |           |                        |       |                |           |          |       |                                                                                                                                                                                                                                                                                                                                                                                                                                     |         |                                                                                                                                                                                                                                                                                                   |                  |       |                     |          |                 |                 |      |           |              |           |                        |   |                |           |          |    |                                                                                                                                                                                                                                                                                                                                                                                                                                     |         |       |          |                                                                                                                                                                                                                                                                                                   |                     |           |                 |           |        |                 |              |           |                        |    |                |           |          |       |       |  |    |       |       |  |
| Sum Freq                                                                                                                                                                                                                                                                                                                                                                                                                             | 12               |       |          |       |                     |                 |                 |           |         |           |              |           |                        |       |                |           |          |       |                                                                                                                                                                                                                                                                                                                                                                                                                                     |         |                                                                                                                                                                                                                                                                                                   |                  |       |                     |          |                 |                 |      |           |              |           |                        |   |                |           |          |    |                                                                                                                                                                                                                                                                                                                                                                                                                                     |         |       |          |                                                                                                                                                                                                                                                                                                   |                     |           |                 |           |        |                 |              |           |                        |    |                |           |          |       |       |  |    |       |       |  |
| Variety                                                                                                                                                                                                                                                                                                                                                                                                                              |                  |       |          |       |                     |                 |                 |           |         |           |              |           |                        |       |                |           |          |       |                                                                                                                                                                                                                                                                                                                                                                                                                                     |         |                                                                                                                                                                                                                                                                                                   |                  |       |                     |          |                 |                 |      |           |              |           |                        |   |                |           |          |    |                                                                                                                                                                                                                                                                                                                                                                                                                                     |         |       |          |                                                                                                                                                                                                                                                                                                   |                     |           |                 |           |        |                 |              |           |                        |    |                |           |          |       |       |  |    |       |       |  |
| Measures                                                                                                                                                                                                                                                                                                                                                                                                                             | Value            |       |          |       |                     |                 |                 |           |         |           |              |           |                        |       |                |           |          |       |                                                                                                                                                                                                                                                                                                                                                                                                                                     |         |                                                                                                                                                                                                                                                                                                   |                  |       |                     |          |                 |                 |      |           |              |           |                        |   |                |           |          |    |                                                                                                                                                                                                                                                                                                                                                                                                                                     |         |       |          |                                                                                                                                                                                                                                                                                                   |                     |           |                 |           |        |                 |              |           |                        |    |                |           |          |       |       |  |    |       |       |  |
| Generalized RSquare                                                                                                                                                                                                                                                                                                                                                                                                                  | 0.9996669        |       |          |       |                     |                 |                 |           |         |           |              |           |                        |       |                |           |          |       |                                                                                                                                                                                                                                                                                                                                                                                                                                     |         |                                                                                                                                                                                                                                                                                                   |                  |       |                     |          |                 |                 |      |           |              |           |                        |   |                |           |          |    |                                                                                                                                                                                                                                                                                                                                                                                                                                     |         |       |          |                                                                                                                                                                                                                                                                                                   |                     |           |                 |           |        |                 |              |           |                        |    |                |           |          |       |       |  |    |       |       |  |
| Entropy RSquare                                                                                                                                                                                                                                                                                                                                                                                                                      | 0.9994448        |       |          |       |                     |                 |                 |           |         |           |              |           |                        |       |                |           |          |       |                                                                                                                                                                                                                                                                                                                                                                                                                                     |         |                                                                                                                                                                                                                                                                                                   |                  |       |                     |          |                 |                 |      |           |              |           |                        |   |                |           |          |    |                                                                                                                                                                                                                                                                                                                                                                                                                                     |         |       |          |                                                                                                                                                                                                                                                                                                   |                     |           |                 |           |        |                 |              |           |                        |    |                |           |          |       |       |  |    |       |       |  |
| RMSE                                                                                                                                                                                                                                                                                                                                                                                                                                 | 0.000478         |       |          |       |                     |                 |                 |           |         |           |              |           |                        |       |                |           |          |       |                                                                                                                                                                                                                                                                                                                                                                                                                                     |         |                                                                                                                                                                                                                                                                                                   |                  |       |                     |          |                 |                 |      |           |              |           |                        |   |                |           |          |    |                                                                                                                                                                                                                                                                                                                                                                                                                                     |         |       |          |                                                                                                                                                                                                                                                                                                   |                     |           |                 |           |        |                 |              |           |                        |    |                |           |          |       |       |  |    |       |       |  |
| Mean Abs Dev                                                                                                                                                                                                                                                                                                                                                                                                                         | 0.0002631        |       |          |       |                     |                 |                 |           |         |           |              |           |                        |       |                |           |          |       |                                                                                                                                                                                                                                                                                                                                                                                                                                     |         |                                                                                                                                                                                                                                                                                                   |                  |       |                     |          |                 |                 |      |           |              |           |                        |   |                |           |          |    |                                                                                                                                                                                                                                                                                                                                                                                                                                     |         |       |          |                                                                                                                                                                                                                                                                                                   |                     |           |                 |           |        |                 |              |           |                        |    |                |           |          |       |       |  |    |       |       |  |
| Misclassification Rate                                                                                                                                                                                                                                                                                                                                                                                                               | 0                |       |          |       |                     |                 |                 |           |         |           |              |           |                        |       |                |           |          |       |                                                                                                                                                                                                                                                                                                                                                                                                                                     |         |                                                                                                                                                                                                                                                                                                   |                  |       |                     |          |                 |                 |      |           |              |           |                        |   |                |           |          |    |                                                                                                                                                                                                                                                                                                                                                                                                                                     |         |       |          |                                                                                                                                                                                                                                                                                                   |                     |           |                 |           |        |                 |              |           |                        |    |                |           |          |       |       |  |    |       |       |  |
| -LogLikelihood                                                                                                                                                                                                                                                                                                                                                                                                                       | 0.0028959        |       |          |       |                     |                 |                 |           |         |           |              |           |                        |       |                |           |          |       |                                                                                                                                                                                                                                                                                                                                                                                                                                     |         |                                                                                                                                                                                                                                                                                                   |                  |       |                     |          |                 |                 |      |           |              |           |                        |   |                |           |          |    |                                                                                                                                                                                                                                                                                                                                                                                                                                     |         |       |          |                                                                                                                                                                                                                                                                                                   |                     |           |                 |           |        |                 |              |           |                        |    |                |           |          |       |       |  |    |       |       |  |
| Sum Freq                                                                                                                                                                                                                                                                                                                                                                                                                             | 11               |       |          |       |                     |                 |                 |           |         |           |              |           |                        |       |                |           |          |       |                                                                                                                                                                                                                                                                                                                                                                                                                                     |         |                                                                                                                                                                                                                                                                                                   |                  |       |                     |          |                 |                 |      |           |              |           |                        |   |                |           |          |    |                                                                                                                                                                                                                                                                                                                                                                                                                                     |         |       |          |                                                                                                                                                                                                                                                                                                   |                     |           |                 |           |        |                 |              |           |                        |    |                |           |          |       |       |  |    |       |       |  |
| <table><tr><th colspan="4">Confusion Matrix</th></tr><tr><th>Actual</th><th colspan="3">Predicted Count</th></tr><tr><th>Variety</th><th>CJ</th><th>DW</th><th></th></tr><tr><td>CJ</td><td>24</td><td>0</td><td></td></tr><tr><td>DW</td><td>0</td><td>11</td><td></td></tr></table>                                                                                                                                                | Confusion Matrix |       |          |       | Actual              | Predicted Count |                 |           | Variety | CJ        | DW           |           | CJ                     | 24    | 0              |           | DW       | 0     | 11                                                                                                                                                                                                                                                                                                                                                                                                                                  |         | <table><tr><th colspan="4">Confusion Matrix</th></tr><tr><th>Actual</th><th colspan="3">Predicted Count</th></tr><tr><th>Variety</th><th>CJ</th><th>DW</th><th></th></tr><tr><td>CJ</td><td>6</td><td>0</td><td></td></tr><tr><td>DW</td><td>0</td><td>6</td><td></td></tr></table>               | Confusion Matrix |       |                     |          | Actual          | Predicted Count |      |           | Variety      | CJ        | DW                     |   | CJ             | 6         | 0        |    | DW                                                                                                                                                                                                                                                                                                                                                                                                                                  | 0       | 6     |          | <table><tr><th colspan="4">Confusion Matrix</th></tr><tr><th>Actual</th><th colspan="3">Predicted Count</th></tr><tr><th>Variety</th><th>CJ</th><th>DW</th><th></th></tr><tr><td>CJ</td><td>9</td><td>0</td><td></td></tr><tr><td>DW</td><td>0</td><td>2</td><td></td></tr></table>               | Confusion Matrix    |           |                 |           | Actual | Predicted Count |              |           | Variety                | CJ | DW             |           | CJ       | 9     | 0     |  | DW | 0     | 2     |  |
| Confusion Matrix                                                                                                                                                                                                                                                                                                                                                                                                                     |                  |       |          |       |                     |                 |                 |           |         |           |              |           |                        |       |                |           |          |       |                                                                                                                                                                                                                                                                                                                                                                                                                                     |         |                                                                                                                                                                                                                                                                                                   |                  |       |                     |          |                 |                 |      |           |              |           |                        |   |                |           |          |    |                                                                                                                                                                                                                                                                                                                                                                                                                                     |         |       |          |                                                                                                                                                                                                                                                                                                   |                     |           |                 |           |        |                 |              |           |                        |    |                |           |          |       |       |  |    |       |       |  |
| Actual                                                                                                                                                                                                                                                                                                                                                                                                                               | Predicted Count  |       |          |       |                     |                 |                 |           |         |           |              |           |                        |       |                |           |          |       |                                                                                                                                                                                                                                                                                                                                                                                                                                     |         |                                                                                                                                                                                                                                                                                                   |                  |       |                     |          |                 |                 |      |           |              |           |                        |   |                |           |          |    |                                                                                                                                                                                                                                                                                                                                                                                                                                     |         |       |          |                                                                                                                                                                                                                                                                                                   |                     |           |                 |           |        |                 |              |           |                        |    |                |           |          |       |       |  |    |       |       |  |
| Variety                                                                                                                                                                                                                                                                                                                                                                                                                              | CJ               | DW    |          |       |                     |                 |                 |           |         |           |              |           |                        |       |                |           |          |       |                                                                                                                                                                                                                                                                                                                                                                                                                                     |         |                                                                                                                                                                                                                                                                                                   |                  |       |                     |          |                 |                 |      |           |              |           |                        |   |                |           |          |    |                                                                                                                                                                                                                                                                                                                                                                                                                                     |         |       |          |                                                                                                                                                                                                                                                                                                   |                     |           |                 |           |        |                 |              |           |                        |    |                |           |          |       |       |  |    |       |       |  |
| CJ                                                                                                                                                                                                                                                                                                                                                                                                                                   | 24               | 0     |          |       |                     |                 |                 |           |         |           |              |           |                        |       |                |           |          |       |                                                                                                                                                                                                                                                                                                                                                                                                                                     |         |                                                                                                                                                                                                                                                                                                   |                  |       |                     |          |                 |                 |      |           |              |           |                        |   |                |           |          |    |                                                                                                                                                                                                                                                                                                                                                                                                                                     |         |       |          |                                                                                                                                                                                                                                                                                                   |                     |           |                 |           |        |                 |              |           |                        |    |                |           |          |       |       |  |    |       |       |  |
| DW                                                                                                                                                                                                                                                                                                                                                                                                                                   | 0                | 11    |          |       |                     |                 |                 |           |         |           |              |           |                        |       |                |           |          |       |                                                                                                                                                                                                                                                                                                                                                                                                                                     |         |                                                                                                                                                                                                                                                                                                   |                  |       |                     |          |                 |                 |      |           |              |           |                        |   |                |           |          |    |                                                                                                                                                                                                                                                                                                                                                                                                                                     |         |       |          |                                                                                                                                                                                                                                                                                                   |                     |           |                 |           |        |                 |              |           |                        |    |                |           |          |       |       |  |    |       |       |  |
| Confusion Matrix                                                                                                                                                                                                                                                                                                                                                                                                                     |                  |       |          |       |                     |                 |                 |           |         |           |              |           |                        |       |                |           |          |       |                                                                                                                                                                                                                                                                                                                                                                                                                                     |         |                                                                                                                                                                                                                                                                                                   |                  |       |                     |          |                 |                 |      |           |              |           |                        |   |                |           |          |    |                                                                                                                                                                                                                                                                                                                                                                                                                                     |         |       |          |                                                                                                                                                                                                                                                                                                   |                     |           |                 |           |        |                 |              |           |                        |    |                |           |          |       |       |  |    |       |       |  |
| Actual                                                                                                                                                                                                                                                                                                                                                                                                                               | Predicted Count  |       |          |       |                     |                 |                 |           |         |           |              |           |                        |       |                |           |          |       |                                                                                                                                                                                                                                                                                                                                                                                                                                     |         |                                                                                                                                                                                                                                                                                                   |                  |       |                     |          |                 |                 |      |           |              |           |                        |   |                |           |          |    |                                                                                                                                                                                                                                                                                                                                                                                                                                     |         |       |          |                                                                                                                                                                                                                                                                                                   |                     |           |                 |           |        |                 |              |           |                        |    |                |           |          |       |       |  |    |       |       |  |
| Variety                                                                                                                                                                                                                                                                                                                                                                                                                              | CJ               | DW    |          |       |                     |                 |                 |           |         |           |              |           |                        |       |                |           |          |       |                                                                                                                                                                                                                                                                                                                                                                                                                                     |         |                                                                                                                                                                                                                                                                                                   |                  |       |                     |          |                 |                 |      |           |              |           |                        |   |                |           |          |    |                                                                                                                                                                                                                                                                                                                                                                                                                                     |         |       |          |                                                                                                                                                                                                                                                                                                   |                     |           |                 |           |        |                 |              |           |                        |    |                |           |          |       |       |  |    |       |       |  |
| CJ                                                                                                                                                                                                                                                                                                                                                                                                                                   | 6                | 0     |          |       |                     |                 |                 |           |         |           |              |           |                        |       |                |           |          |       |                                                                                                                                                                                                                                                                                                                                                                                                                                     |         |                                                                                                                                                                                                                                                                                                   |                  |       |                     |          |                 |                 |      |           |              |           |                        |   |                |           |          |    |                                                                                                                                                                                                                                                                                                                                                                                                                                     |         |       |          |                                                                                                                                                                                                                                                                                                   |                     |           |                 |           |        |                 |              |           |                        |    |                |           |          |       |       |  |    |       |       |  |
| DW                                                                                                                                                                                                                                                                                                                                                                                                                                   | 0                | 6     |          |       |                     |                 |                 |           |         |           |              |           |                        |       |                |           |          |       |                                                                                                                                                                                                                                                                                                                                                                                                                                     |         |                                                                                                                                                                                                                                                                                                   |                  |       |                     |          |                 |                 |      |           |              |           |                        |   |                |           |          |    |                                                                                                                                                                                                                                                                                                                                                                                                                                     |         |       |          |                                                                                                                                                                                                                                                                                                   |                     |           |                 |           |        |                 |              |           |                        |    |                |           |          |       |       |  |    |       |       |  |
| Confusion Matrix                                                                                                                                                                                                                                                                                                                                                                                                                     |                  |       |          |       |                     |                 |                 |           |         |           |              |           |                        |       |                |           |          |       |                                                                                                                                                                                                                                                                                                                                                                                                                                     |         |                                                                                                                                                                                                                                                                                                   |                  |       |                     |          |                 |                 |      |           |              |           |                        |   |                |           |          |    |                                                                                                                                                                                                                                                                                                                                                                                                                                     |         |       |          |                                                                                                                                                                                                                                                                                                   |                     |           |                 |           |        |                 |              |           |                        |    |                |           |          |       |       |  |    |       |       |  |
| Actual                                                                                                                                                                                                                                                                                                                                                                                                                               | Predicted Count  |       |          |       |                     |                 |                 |           |         |           |              |           |                        |       |                |           |          |       |                                                                                                                                                                                                                                                                                                                                                                                                                                     |         |                                                                                                                                                                                                                                                                                                   |                  |       |                     |          |                 |                 |      |           |              |           |                        |   |                |           |          |    |                                                                                                                                                                                                                                                                                                                                                                                                                                     |         |       |          |                                                                                                                                                                                                                                                                                                   |                     |           |                 |           |        |                 |              |           |                        |    |                |           |          |       |       |  |    |       |       |  |
| Variety                                                                                                                                                                                                                                                                                                                                                                                                                              | CJ               | DW    |          |       |                     |                 |                 |           |         |           |              |           |                        |       |                |           |          |       |                                                                                                                                                                                                                                                                                                                                                                                                                                     |         |                                                                                                                                                                                                                                                                                                   |                  |       |                     |          |                 |                 |      |           |              |           |                        |   |                |           |          |    |                                                                                                                                                                                                                                                                                                                                                                                                                                     |         |       |          |                                                                                                                                                                                                                                                                                                   |                     |           |                 |           |        |                 |              |           |                        |    |                |           |          |       |       |  |    |       |       |  |
| CJ                                                                                                                                                                                                                                                                                                                                                                                                                                   | 9                | 0     |          |       |                     |                 |                 |           |         |           |              |           |                        |       |                |           |          |       |                                                                                                                                                                                                                                                                                                                                                                                                                                     |         |                                                                                                                                                                                                                                                                                                   |                  |       |                     |          |                 |                 |      |           |              |           |                        |   |                |           |          |    |                                                                                                                                                                                                                                                                                                                                                                                                                                     |         |       |          |                                                                                                                                                                                                                                                                                                   |                     |           |                 |           |        |                 |              |           |                        |    |                |           |          |       |       |  |    |       |       |  |
| DW                                                                                                                                                                                                                                                                                                                                                                                                                                   | 0                | 2     |          |       |                     |                 |                 |           |         |           |              |           |                        |       |                |           |          |       |                                                                                                                                                                                                                                                                                                                                                                                                                                     |         |                                                                                                                                                                                                                                                                                                   |                  |       |                     |          |                 |                 |      |           |              |           |                        |   |                |           |          |    |                                                                                                                                                                                                                                                                                                                                                                                                                                     |         |       |          |                                                                                                                                                                                                                                                                                                   |                     |           |                 |           |        |                 |              |           |                        |    |                |           |          |       |       |  |    |       |       |  |
| <table><tr><th colspan="4">Confusion Rates</th></tr><tr><th>Actual</th><th colspan="3">Predicted Rate</th></tr><tr><th>Variety</th><th>CJ</th><th>DW</th><th></th></tr><tr><td>CJ</td><td>1.000</td><td>0.000</td><td></td></tr><tr><td>DW</td><td>0.000</td><td>1.000</td><td></td></tr></table>                                                                                                                                    | Confusion Rates  |       |          |       | Actual              | Predicted Rate  |                 |           | Variety | CJ        | DW           |           | CJ                     | 1.000 | 0.000          |           | DW       | 0.000 | 1.000                                                                                                                                                                                                                                                                                                                                                                                                                               |         | <table><tr><th colspan="4">Confusion Rates</th></tr><tr><th>Actual</th><th colspan="3">Predicted Rate</th></tr><tr><th>Variety</th><th>CJ</th><th>DW</th><th></th></tr><tr><td>CJ</td><td>1.000</td><td>0.000</td><td></td></tr><tr><td>DW</td><td>0.000</td><td>1.000</td><td></td></tr></table> | Confusion Rates  |       |                     |          | Actual          | Predicted Rate  |      |           | Variety      | CJ        | DW                     |   | CJ             | 1.000     | 0.000    |    | DW                                                                                                                                                                                                                                                                                                                                                                                                                                  | 0.000   | 1.000 |          | <table><tr><th colspan="4">Confusion Rates</th></tr><tr><th>Actual</th><th colspan="3">Predicted Rate</th></tr><tr><th>Variety</th><th>CJ</th><th>DW</th><th></th></tr><tr><td>CJ</td><td>1.000</td><td>0.000</td><td></td></tr><tr><td>DW</td><td>0.000</td><td>1.000</td><td></td></tr></table> | Confusion Rates     |           |                 |           | Actual | Predicted Rate  |              |           | Variety                | CJ | DW             |           | CJ       | 1.000 | 0.000 |  | DW | 0.000 | 1.000 |  |
| Confusion Rates                                                                                                                                                                                                                                                                                                                                                                                                                      |                  |       |          |       |                     |                 |                 |           |         |           |              |           |                        |       |                |           |          |       |                                                                                                                                                                                                                                                                                                                                                                                                                                     |         |                                                                                                                                                                                                                                                                                                   |                  |       |                     |          |                 |                 |      |           |              |           |                        |   |                |           |          |    |                                                                                                                                                                                                                                                                                                                                                                                                                                     |         |       |          |                                                                                                                                                                                                                                                                                                   |                     |           |                 |           |        |                 |              |           |                        |    |                |           |          |       |       |  |    |       |       |  |
| Actual                                                                                                                                                                                                                                                                                                                                                                                                                               | Predicted Rate   |       |          |       |                     |                 |                 |           |         |           |              |           |                        |       |                |           |          |       |                                                                                                                                                                                                                                                                                                                                                                                                                                     |         |                                                                                                                                                                                                                                                                                                   |                  |       |                     |          |                 |                 |      |           |              |           |                        |   |                |           |          |    |                                                                                                                                                                                                                                                                                                                                                                                                                                     |         |       |          |                                                                                                                                                                                                                                                                                                   |                     |           |                 |           |        |                 |              |           |                        |    |                |           |          |       |       |  |    |       |       |  |
| Variety                                                                                                                                                                                                                                                                                                                                                                                                                              | CJ               | DW    |          |       |                     |                 |                 |           |         |           |              |           |                        |       |                |           |          |       |                                                                                                                                                                                                                                                                                                                                                                                                                                     |         |                                                                                                                                                                                                                                                                                                   |                  |       |                     |          |                 |                 |      |           |              |           |                        |   |                |           |          |    |                                                                                                                                                                                                                                                                                                                                                                                                                                     |         |       |          |                                                                                                                                                                                                                                                                                                   |                     |           |                 |           |        |                 |              |           |                        |    |                |           |          |       |       |  |    |       |       |  |
| CJ                                                                                                                                                                                                                                                                                                                                                                                                                                   | 1.000            | 0.000 |          |       |                     |                 |                 |           |         |           |              |           |                        |       |                |           |          |       |                                                                                                                                                                                                                                                                                                                                                                                                                                     |         |                                                                                                                                                                                                                                                                                                   |                  |       |                     |          |                 |                 |      |           |              |           |                        |   |                |           |          |    |                                                                                                                                                                                                                                                                                                                                                                                                                                     |         |       |          |                                                                                                                                                                                                                                                                                                   |                     |           |                 |           |        |                 |              |           |                        |    |                |           |          |       |       |  |    |       |       |  |
| DW                                                                                                                                                                                                                                                                                                                                                                                                                                   | 0.000            | 1.000 |          |       |                     |                 |                 |           |         |           |              |           |                        |       |                |           |          |       |                                                                                                                                                                                                                                                                                                                                                                                                                                     |         |                                                                                                                                                                                                                                                                                                   |                  |       |                     |          |                 |                 |      |           |              |           |                        |   |                |           |          |    |                                                                                                                                                                                                                                                                                                                                                                                                                                     |         |       |          |                                                                                                                                                                                                                                                                                                   |                     |           |                 |           |        |                 |              |           |                        |    |                |           |          |       |       |  |    |       |       |  |
| Confusion Rates                                                                                                                                                                                                                                                                                                                                                                                                                      |                  |       |          |       |                     |                 |                 |           |         |           |              |           |                        |       |                |           |          |       |                                                                                                                                                                                                                                                                                                                                                                                                                                     |         |                                                                                                                                                                                                                                                                                                   |                  |       |                     |          |                 |                 |      |           |              |           |                        |   |                |           |          |    |                                                                                                                                                                                                                                                                                                                                                                                                                                     |         |       |          |                                                                                                                                                                                                                                                                                                   |                     |           |                 |           |        |                 |              |           |                        |    |                |           |          |       |       |  |    |       |       |  |
| Actual                                                                                                                                                                                                                                                                                                                                                                                                                               | Predicted Rate   |       |          |       |                     |                 |                 |           |         |           |              |           |                        |       |                |           |          |       |                                                                                                                                                                                                                                                                                                                                                                                                                                     |         |                                                                                                                                                                                                                                                                                                   |                  |       |                     |          |                 |                 |      |           |              |           |                        |   |                |           |          |    |                                                                                                                                                                                                                                                                                                                                                                                                                                     |         |       |          |                                                                                                                                                                                                                                                                                                   |                     |           |                 |           |        |                 |              |           |                        |    |                |           |          |       |       |  |    |       |       |  |
| Variety                                                                                                                                                                                                                                                                                                                                                                                                                              | CJ               | DW    |          |       |                     |                 |                 |           |         |           |              |           |                        |       |                |           |          |       |                                                                                                                                                                                                                                                                                                                                                                                                                                     |         |                                                                                                                                                                                                                                                                                                   |                  |       |                     |          |                 |                 |      |           |              |           |                        |   |                |           |          |    |                                                                                                                                                                                                                                                                                                                                                                                                                                     |         |       |          |                                                                                                                                                                                                                                                                                                   |                     |           |                 |           |        |                 |              |           |                        |    |                |           |          |       |       |  |    |       |       |  |
| CJ                                                                                                                                                                                                                                                                                                                                                                                                                                   | 1.000            | 0.000 |          |       |                     |                 |                 |           |         |           |              |           |                        |       |                |           |          |       |                                                                                                                                                                                                                                                                                                                                                                                                                                     |         |                                                                                                                                                                                                                                                                                                   |                  |       |                     |          |                 |                 |      |           |              |           |                        |   |                |           |          |    |                                                                                                                                                                                                                                                                                                                                                                                                                                     |         |       |          |                                                                                                                                                                                                                                                                                                   |                     |           |                 |           |        |                 |              |           |                        |    |                |           |          |       |       |  |    |       |       |  |
| DW                                                                                                                                                                                                                                                                                                                                                                                                                                   | 0.000            | 1.000 |          |       |                     |                 |                 |           |         |           |              |           |                        |       |                |           |          |       |                                                                                                                                                                                                                                                                                                                                                                                                                                     |         |                                                                                                                                                                                                                                                                                                   |                  |       |                     |          |                 |                 |      |           |              |           |                        |   |                |           |          |    |                                                                                                                                                                                                                                                                                                                                                                                                                                     |         |       |          |                                                                                                                                                                                                                                                                                                   |                     |           |                 |           |        |                 |              |           |                        |    |                |           |          |       |       |  |    |       |       |  |
| Confusion Rates                                                                                                                                                                                                                                                                                                                                                                                                                      |                  |       |          |       |                     |                 |                 |           |         |           |              |           |                        |       |                |           |          |       |                                                                                                                                                                                                                                                                                                                                                                                                                                     |         |                                                                                                                                                                                                                                                                                                   |                  |       |                     |          |                 |                 |      |           |              |           |                        |   |                |           |          |    |                                                                                                                                                                                                                                                                                                                                                                                                                                     |         |       |          |                                                                                                                                                                                                                                                                                                   |                     |           |                 |           |        |                 |              |           |                        |    |                |           |          |       |       |  |    |       |       |  |
| Actual                                                                                                                                                                                                                                                                                                                                                                                                                               | Predicted Rate   |       |          |       |                     |                 |                 |           |         |           |              |           |                        |       |                |           |          |       |                                                                                                                                                                                                                                                                                                                                                                                                                                     |         |                                                                                                                                                                                                                                                                                                   |                  |       |                     |          |                 |                 |      |           |              |           |                        |   |                |           |          |    |                                                                                                                                                                                                                                                                                                                                                                                                                                     |         |       |          |                                                                                                                                                                                                                                                                                                   |                     |           |                 |           |        |                 |              |           |                        |    |                |           |          |       |       |  |    |       |       |  |
| Variety                                                                                                                                                                                                                                                                                                                                                                                                                              | CJ               | DW    |          |       |                     |                 |                 |           |         |           |              |           |                        |       |                |           |          |       |                                                                                                                                                                                                                                                                                                                                                                                                                                     |         |                                                                                                                                                                                                                                                                                                   |                  |       |                     |          |                 |                 |      |           |              |           |                        |   |                |           |          |    |                                                                                                                                                                                                                                                                                                                                                                                                                                     |         |       |          |                                                                                                                                                                                                                                                                                                   |                     |           |                 |           |        |                 |              |           |                        |    |                |           |          |       |       |  |    |       |       |  |
| CJ                                                                                                                                                                                                                                                                                                                                                                                                                                   | 1.000            | 0.000 |          |       |                     |                 |                 |           |         |           |              |           |                        |       |                |           |          |       |                                                                                                                                                                                                                                                                                                                                                                                                                                     |         |                                                                                                                                                                                                                                                                                                   |                  |       |                     |          |                 |                 |      |           |              |           |                        |   |                |           |          |    |                                                                                                                                                                                                                                                                                                                                                                                                                                     |         |       |          |                                                                                                                                                                                                                                                                                                   |                     |           |                 |           |        |                 |              |           |                        |    |                |           |          |       |       |  |    |       |       |  |
| DW                                                                                                                                                                                                                                                                                                                                                                                                                                   | 0.000            | 1.000 |          |       |                     |                 |                 |           |         |           |              |           |                        |       |                |           |          |       |                                                                                                                                                                                                                                                                                                                                                                                                                                     |         |                                                                                                                                                                                                                                                                                                   |                  |       |                     |          |                 |                 |      |           |              |           |                        |   |                |           |          |    |                                                                                                                                                                                                                                                                                                                                                                                                                                     |         |       |          |                                                                                                                                                                                                                                                                                                   |                     |           |                 |           |        |                 |              |           |                        |    |                |           |          |       |       |  |    |       |       |  |

Neural

Validation Column: Validation0.6

(C)

Model NTanH(3)NBoost(2)

| Training                                                                                                                                                                                                                                                                                                                                                                                                                          | Validation       | Test  |          |       |                     |                 |                 |           |      |           |              |           |                        |       |                |           |          |       |                                                                                                                                                                                                                                                                                                                                                                                                                                  |      |                                                                                                                                                                                                                                                                                                |                  |       |                     |           |                 |                 |      |           |              |           |                        |   |                |          |          |    |                                                                                                                                                                                                                                                                                                                                                                                                                                  |       |       |          |                                                                                                                                                                                                                                                                                                |                     |           |                 |           |        |                 |              |           |                        |    |                |           |          |       |       |  |    |       |       |  |
|-----------------------------------------------------------------------------------------------------------------------------------------------------------------------------------------------------------------------------------------------------------------------------------------------------------------------------------------------------------------------------------------------------------------------------------|------------------|-------|----------|-------|---------------------|-----------------|-----------------|-----------|------|-----------|--------------|-----------|------------------------|-------|----------------|-----------|----------|-------|----------------------------------------------------------------------------------------------------------------------------------------------------------------------------------------------------------------------------------------------------------------------------------------------------------------------------------------------------------------------------------------------------------------------------------|------|------------------------------------------------------------------------------------------------------------------------------------------------------------------------------------------------------------------------------------------------------------------------------------------------|------------------|-------|---------------------|-----------|-----------------|-----------------|------|-----------|--------------|-----------|------------------------|---|----------------|----------|----------|----|----------------------------------------------------------------------------------------------------------------------------------------------------------------------------------------------------------------------------------------------------------------------------------------------------------------------------------------------------------------------------------------------------------------------------------|-------|-------|----------|------------------------------------------------------------------------------------------------------------------------------------------------------------------------------------------------------------------------------------------------------------------------------------------------|---------------------|-----------|-----------------|-----------|--------|-----------------|--------------|-----------|------------------------|----|----------------|-----------|----------|-------|-------|--|----|-------|-------|--|
| <table><tr><th>City</th><th></th></tr><tr><td>Measures</td><td>Value</td></tr><tr><td>Generalized RSquare</td><td>0.9999654</td></tr><tr><td>Entropy RSquare</td><td>0.9999926</td></tr><tr><td>RMSE</td><td>0.0001493</td></tr><tr><td>Mean Abs Dev</td><td>5.0547e-5</td></tr><tr><td>Misclassification Rate</td><td>0</td></tr><tr><td>-LogLikelihood</td><td>0.0017695</td></tr><tr><td>Sum Freq</td><td>35</td></tr></table> | City             |       | Measures | Value | Generalized RSquare | 0.9999654       | Entropy RSquare | 0.9999926 | RMSE | 0.0001493 | Mean Abs Dev | 5.0547e-5 | Misclassification Rate | 0     | -LogLikelihood | 0.0017695 | Sum Freq | 35    | <table><tr><th>City</th><th></th></tr><tr><td>Measures</td><td>Value</td></tr><tr><td>Generalized RSquare</td><td>0.9981204</td></tr><tr><td>Entropy RSquare</td><td>0.9974634</td></tr><tr><td>RMSE</td><td>0.0014243</td></tr><tr><td>Mean Abs Dev</td><td>0.0007266</td></tr><tr><td>Misclassification Rate</td><td>0</td></tr><tr><td>-LogLikelihood</td><td>0.008731</td></tr><tr><td>Sum Freq</td><td>12</td></tr></table> | City |                                                                                                                                                                                                                                                                                                | Measures         | Value | Generalized RSquare | 0.9981204 | Entropy RSquare | 0.9974634       | RMSE | 0.0014243 | Mean Abs Dev | 0.0007266 | Misclassification Rate | 0 | -LogLikelihood | 0.008731 | Sum Freq | 12 | <table><tr><th>City</th><th></th></tr><tr><td>Measures</td><td>Value</td></tr><tr><td>Generalized RSquare</td><td>0.9911419</td></tr><tr><td>Entropy RSquare</td><td>0.9833221</td></tr><tr><td>RMSE</td><td>0.0226218</td></tr><tr><td>Mean Abs Dev</td><td>0.0095058</td></tr><tr><td>Misclassification Rate</td><td>0</td></tr><tr><td>-LogLikelihood</td><td>0.1074969</td></tr><tr><td>Sum Freq</td><td>1</td></tr></table> | City  |       | Measures | Value                                                                                                                                                                                                                                                                                          | Generalized RSquare | 0.9911419 | Entropy RSquare | 0.9833221 | RMSE   | 0.0226218       | Mean Abs Dev | 0.0095058 | Misclassification Rate | 0  | -LogLikelihood | 0.1074969 | Sum Freq | 1     |       |  |    |       |       |  |
| City                                                                                                                                                                                                                                                                                                                                                                                                                              |                  |       |          |       |                     |                 |                 |           |      |           |              |           |                        |       |                |           |          |       |                                                                                                                                                                                                                                                                                                                                                                                                                                  |      |                                                                                                                                                                                                                                                                                                |                  |       |                     |           |                 |                 |      |           |              |           |                        |   |                |          |          |    |                                                                                                                                                                                                                                                                                                                                                                                                                                  |       |       |          |                                                                                                                                                                                                                                                                                                |                     |           |                 |           |        |                 |              |           |                        |    |                |           |          |       |       |  |    |       |       |  |
| Measures                                                                                                                                                                                                                                                                                                                                                                                                                          | Value            |       |          |       |                     |                 |                 |           |      |           |              |           |                        |       |                |           |          |       |                                                                                                                                                                                                                                                                                                                                                                                                                                  |      |                                                                                                                                                                                                                                                                                                |                  |       |                     |           |                 |                 |      |           |              |           |                        |   |                |          |          |    |                                                                                                                                                                                                                                                                                                                                                                                                                                  |       |       |          |                                                                                                                                                                                                                                                                                                |                     |           |                 |           |        |                 |              |           |                        |    |                |           |          |       |       |  |    |       |       |  |
| Generalized RSquare                                                                                                                                                                                                                                                                                                                                                                                                               | 0.9999654        |       |          |       |                     |                 |                 |           |      |           |              |           |                        |       |                |           |          |       |                                                                                                                                                                                                                                                                                                                                                                                                                                  |      |                                                                                                                                                                                                                                                                                                |                  |       |                     |           |                 |                 |      |           |              |           |                        |   |                |          |          |    |                                                                                                                                                                                                                                                                                                                                                                                                                                  |       |       |          |                                                                                                                                                                                                                                                                                                |                     |           |                 |           |        |                 |              |           |                        |    |                |           |          |       |       |  |    |       |       |  |
| Entropy RSquare                                                                                                                                                                                                                                                                                                                                                                                                                   | 0.9999926        |       |          |       |                     |                 |                 |           |      |           |              |           |                        |       |                |           |          |       |                                                                                                                                                                                                                                                                                                                                                                                                                                  |      |                                                                                                                                                                                                                                                                                                |                  |       |                     |           |                 |                 |      |           |              |           |                        |   |                |          |          |    |                                                                                                                                                                                                                                                                                                                                                                                                                                  |       |       |          |                                                                                                                                                                                                                                                                                                |                     |           |                 |           |        |                 |              |           |                        |    |                |           |          |       |       |  |    |       |       |  |
| RMSE                                                                                                                                                                                                                                                                                                                                                                                                                              | 0.0001493        |       |          |       |                     |                 |                 |           |      |           |              |           |                        |       |                |           |          |       |                                                                                                                                                                                                                                                                                                                                                                                                                                  |      |                                                                                                                                                                                                                                                                                                |                  |       |                     |           |                 |                 |      |           |              |           |                        |   |                |          |          |    |                                                                                                                                                                                                                                                                                                                                                                                                                                  |       |       |          |                                                                                                                                                                                                                                                                                                |                     |           |                 |           |        |                 |              |           |                        |    |                |           |          |       |       |  |    |       |       |  |
| Mean Abs Dev                                                                                                                                                                                                                                                                                                                                                                                                                      | 5.0547e-5        |       |          |       |                     |                 |                 |           |      |           |              |           |                        |       |                |           |          |       |                                                                                                                                                                                                                                                                                                                                                                                                                                  |      |                                                                                                                                                                                                                                                                                                |                  |       |                     |           |                 |                 |      |           |              |           |                        |   |                |          |          |    |                                                                                                                                                                                                                                                                                                                                                                                                                                  |       |       |          |                                                                                                                                                                                                                                                                                                |                     |           |                 |           |        |                 |              |           |                        |    |                |           |          |       |       |  |    |       |       |  |
| Misclassification Rate                                                                                                                                                                                                                                                                                                                                                                                                            | 0                |       |          |       |                     |                 |                 |           |      |           |              |           |                        |       |                |           |          |       |                                                                                                                                                                                                                                                                                                                                                                                                                                  |      |                                                                                                                                                                                                                                                                                                |                  |       |                     |           |                 |                 |      |           |              |           |                        |   |                |          |          |    |                                                                                                                                                                                                                                                                                                                                                                                                                                  |       |       |          |                                                                                                                                                                                                                                                                                                |                     |           |                 |           |        |                 |              |           |                        |    |                |           |          |       |       |  |    |       |       |  |
| -LogLikelihood                                                                                                                                                                                                                                                                                                                                                                                                                    | 0.0017695        |       |          |       |                     |                 |                 |           |      |           |              |           |                        |       |                |           |          |       |                                                                                                                                                                                                                                                                                                                                                                                                                                  |      |                                                                                                                                                                                                                                                                                                |                  |       |                     |           |                 |                 |      |           |              |           |                        |   |                |          |          |    |                                                                                                                                                                                                                                                                                                                                                                                                                                  |       |       |          |                                                                                                                                                                                                                                                                                                |                     |           |                 |           |        |                 |              |           |                        |    |                |           |          |       |       |  |    |       |       |  |
| Sum Freq                                                                                                                                                                                                                                                                                                                                                                                                                          | 35               |       |          |       |                     |                 |                 |           |      |           |              |           |                        |       |                |           |          |       |                                                                                                                                                                                                                                                                                                                                                                                                                                  |      |                                                                                                                                                                                                                                                                                                |                  |       |                     |           |                 |                 |      |           |              |           |                        |   |                |          |          |    |                                                                                                                                                                                                                                                                                                                                                                                                                                  |       |       |          |                                                                                                                                                                                                                                                                                                |                     |           |                 |           |        |                 |              |           |                        |    |                |           |          |       |       |  |    |       |       |  |
| City                                                                                                                                                                                                                                                                                                                                                                                                                              |                  |       |          |       |                     |                 |                 |           |      |           |              |           |                        |       |                |           |          |       |                                                                                                                                                                                                                                                                                                                                                                                                                                  |      |                                                                                                                                                                                                                                                                                                |                  |       |                     |           |                 |                 |      |           |              |           |                        |   |                |          |          |    |                                                                                                                                                                                                                                                                                                                                                                                                                                  |       |       |          |                                                                                                                                                                                                                                                                                                |                     |           |                 |           |        |                 |              |           |                        |    |                |           |          |       |       |  |    |       |       |  |
| Measures                                                                                                                                                                                                                                                                                                                                                                                                                          | Value            |       |          |       |                     |                 |                 |           |      |           |              |           |                        |       |                |           |          |       |                                                                                                                                                                                                                                                                                                                                                                                                                                  |      |                                                                                                                                                                                                                                                                                                |                  |       |                     |           |                 |                 |      |           |              |           |                        |   |                |          |          |    |                                                                                                                                                                                                                                                                                                                                                                                                                                  |       |       |          |                                                                                                                                                                                                                                                                                                |                     |           |                 |           |        |                 |              |           |                        |    |                |           |          |       |       |  |    |       |       |  |
| Generalized RSquare                                                                                                                                                                                                                                                                                                                                                                                                               | 0.9981204        |       |          |       |                     |                 |                 |           |      |           |              |           |                        |       |                |           |          |       |                                                                                                                                                                                                                                                                                                                                                                                                                                  |      |                                                                                                                                                                                                                                                                                                |                  |       |                     |           |                 |                 |      |           |              |           |                        |   |                |          |          |    |                                                                                                                                                                                                                                                                                                                                                                                                                                  |       |       |          |                                                                                                                                                                                                                                                                                                |                     |           |                 |           |        |                 |              |           |                        |    |                |           |          |       |       |  |    |       |       |  |
| Entropy RSquare                                                                                                                                                                                                                                                                                                                                                                                                                   | 0.9974634        |       |          |       |                     |                 |                 |           |      |           |              |           |                        |       |                |           |          |       |                                                                                                                                                                                                                                                                                                                                                                                                                                  |      |                                                                                                                                                                                                                                                                                                |                  |       |                     |           |                 |                 |      |           |              |           |                        |   |                |          |          |    |                                                                                                                                                                                                                                                                                                                                                                                                                                  |       |       |          |                                                                                                                                                                                                                                                                                                |                     |           |                 |           |        |                 |              |           |                        |    |                |           |          |       |       |  |    |       |       |  |
| RMSE                                                                                                                                                                                                                                                                                                                                                                                                                              | 0.0014243        |       |          |       |                     |                 |                 |           |      |           |              |           |                        |       |                |           |          |       |                                                                                                                                                                                                                                                                                                                                                                                                                                  |      |                                                                                                                                                                                                                                                                                                |                  |       |                     |           |                 |                 |      |           |              |           |                        |   |                |          |          |    |                                                                                                                                                                                                                                                                                                                                                                                                                                  |       |       |          |                                                                                                                                                                                                                                                                                                |                     |           |                 |           |        |                 |              |           |                        |    |                |           |          |       |       |  |    |       |       |  |
| Mean Abs Dev                                                                                                                                                                                                                                                                                                                                                                                                                      | 0.0007266        |       |          |       |                     |                 |                 |           |      |           |              |           |                        |       |                |           |          |       |                                                                                                                                                                                                                                                                                                                                                                                                                                  |      |                                                                                                                                                                                                                                                                                                |                  |       |                     |           |                 |                 |      |           |              |           |                        |   |                |          |          |    |                                                                                                                                                                                                                                                                                                                                                                                                                                  |       |       |          |                                                                                                                                                                                                                                                                                                |                     |           |                 |           |        |                 |              |           |                        |    |                |           |          |       |       |  |    |       |       |  |
| Misclassification Rate                                                                                                                                                                                                                                                                                                                                                                                                            | 0                |       |          |       |                     |                 |                 |           |      |           |              |           |                        |       |                |           |          |       |                                                                                                                                                                                                                                                                                                                                                                                                                                  |      |                                                                                                                                                                                                                                                                                                |                  |       |                     |           |                 |                 |      |           |              |           |                        |   |                |          |          |    |                                                                                                                                                                                                                                                                                                                                                                                                                                  |       |       |          |                                                                                                                                                                                                                                                                                                |                     |           |                 |           |        |                 |              |           |                        |    |                |           |          |       |       |  |    |       |       |  |
| -LogLikelihood                                                                                                                                                                                                                                                                                                                                                                                                                    | 0.008731         |       |          |       |                     |                 |                 |           |      |           |              |           |                        |       |                |           |          |       |                                                                                                                                                                                                                                                                                                                                                                                                                                  |      |                                                                                                                                                                                                                                                                                                |                  |       |                     |           |                 |                 |      |           |              |           |                        |   |                |          |          |    |                                                                                                                                                                                                                                                                                                                                                                                                                                  |       |       |          |                                                                                                                                                                                                                                                                                                |                     |           |                 |           |        |                 |              |           |                        |    |                |           |          |       |       |  |    |       |       |  |
| Sum Freq                                                                                                                                                                                                                                                                                                                                                                                                                          | 12               |       |          |       |                     |                 |                 |           |      |           |              |           |                        |       |                |           |          |       |                                                                                                                                                                                                                                                                                                                                                                                                                                  |      |                                                                                                                                                                                                                                                                                                |                  |       |                     |           |                 |                 |      |           |              |           |                        |   |                |          |          |    |                                                                                                                                                                                                                                                                                                                                                                                                                                  |       |       |          |                                                                                                                                                                                                                                                                                                |                     |           |                 |           |        |                 |              |           |                        |    |                |           |          |       |       |  |    |       |       |  |
| City                                                                                                                                                                                                                                                                                                                                                                                                                              |                  |       |          |       |                     |                 |                 |           |      |           |              |           |                        |       |                |           |          |       |                                                                                                                                                                                                                                                                                                                                                                                                                                  |      |                                                                                                                                                                                                                                                                                                |                  |       |                     |           |                 |                 |      |           |              |           |                        |   |                |          |          |    |                                                                                                                                                                                                                                                                                                                                                                                                                                  |       |       |          |                                                                                                                                                                                                                                                                                                |                     |           |                 |           |        |                 |              |           |                        |    |                |           |          |       |       |  |    |       |       |  |
| Measures                                                                                                                                                                                                                                                                                                                                                                                                                          | Value            |       |          |       |                     |                 |                 |           |      |           |              |           |                        |       |                |           |          |       |                                                                                                                                                                                                                                                                                                                                                                                                                                  |      |                                                                                                                                                                                                                                                                                                |                  |       |                     |           |                 |                 |      |           |              |           |                        |   |                |          |          |    |                                                                                                                                                                                                                                                                                                                                                                                                                                  |       |       |          |                                                                                                                                                                                                                                                                                                |                     |           |                 |           |        |                 |              |           |                        |    |                |           |          |       |       |  |    |       |       |  |
| Generalized RSquare                                                                                                                                                                                                                                                                                                                                                                                                               | 0.9911419        |       |          |       |                     |                 |                 |           |      |           |              |           |                        |       |                |           |          |       |                                                                                                                                                                                                                                                                                                                                                                                                                                  |      |                                                                                                                                                                                                                                                                                                |                  |       |                     |           |                 |                 |      |           |              |           |                        |   |                |          |          |    |                                                                                                                                                                                                                                                                                                                                                                                                                                  |       |       |          |                                                                                                                                                                                                                                                                                                |                     |           |                 |           |        |                 |              |           |                        |    |                |           |          |       |       |  |    |       |       |  |
| Entropy RSquare                                                                                                                                                                                                                                                                                                                                                                                                                   | 0.9833221        |       |          |       |                     |                 |                 |           |      |           |              |           |                        |       |                |           |          |       |                                                                                                                                                                                                                                                                                                                                                                                                                                  |      |                                                                                                                                                                                                                                                                                                |                  |       |                     |           |                 |                 |      |           |              |           |                        |   |                |          |          |    |                                                                                                                                                                                                                                                                                                                                                                                                                                  |       |       |          |                                                                                                                                                                                                                                                                                                |                     |           |                 |           |        |                 |              |           |                        |    |                |           |          |       |       |  |    |       |       |  |
| RMSE                                                                                                                                                                                                                                                                                                                                                                                                                              | 0.0226218        |       |          |       |                     |                 |                 |           |      |           |              |           |                        |       |                |           |          |       |                                                                                                                                                                                                                                                                                                                                                                                                                                  |      |                                                                                                                                                                                                                                                                                                |                  |       |                     |           |                 |                 |      |           |              |           |                        |   |                |          |          |    |                                                                                                                                                                                                                                                                                                                                                                                                                                  |       |       |          |                                                                                                                                                                                                                                                                                                |                     |           |                 |           |        |                 |              |           |                        |    |                |           |          |       |       |  |    |       |       |  |
| Mean Abs Dev                                                                                                                                                                                                                                                                                                                                                                                                                      | 0.0095058        |       |          |       |                     |                 |                 |           |      |           |              |           |                        |       |                |           |          |       |                                                                                                                                                                                                                                                                                                                                                                                                                                  |      |                                                                                                                                                                                                                                                                                                |                  |       |                     |           |                 |                 |      |           |              |           |                        |   |                |          |          |    |                                                                                                                                                                                                                                                                                                                                                                                                                                  |       |       |          |                                                                                                                                                                                                                                                                                                |                     |           |                 |           |        |                 |              |           |                        |    |                |           |          |       |       |  |    |       |       |  |
| Misclassification Rate                                                                                                                                                                                                                                                                                                                                                                                                            | 0                |       |          |       |                     |                 |                 |           |      |           |              |           |                        |       |                |           |          |       |                                                                                                                                                                                                                                                                                                                                                                                                                                  |      |                                                                                                                                                                                                                                                                                                |                  |       |                     |           |                 |                 |      |           |              |           |                        |   |                |          |          |    |                                                                                                                                                                                                                                                                                                                                                                                                                                  |       |       |          |                                                                                                                                                                                                                                                                                                |                     |           |                 |           |        |                 |              |           |                        |    |                |           |          |       |       |  |    |       |       |  |
| -LogLikelihood                                                                                                                                                                                                                                                                                                                                                                                                                    | 0.1074969        |       |          |       |                     |                 |                 |           |      |           |              |           |                        |       |                |           |          |       |                                                                                                                                                                                                                                                                                                                                                                                                                                  |      |                                                                                                                                                                                                                                                                                                |                  |       |                     |           |                 |                 |      |           |              |           |                        |   |                |          |          |    |                                                                                                                                                                                                                                                                                                                                                                                                                                  |       |       |          |                                                                                                                                                                                                                                                                                                |                     |           |                 |           |        |                 |              |           |                        |    |                |           |          |       |       |  |    |       |       |  |
| Sum Freq                                                                                                                                                                                                                                                                                                                                                                                                                          | 1                |       |          |       |                     |                 |                 |           |      |           |              |           |                        |       |                |           |          |       |                                                                                                                                                                                                                                                                                                                                                                                                                                  |      |                                                                                                                                                                                                                                                                                                |                  |       |                     |           |                 |                 |      |           |              |           |                        |   |                |          |          |    |                                                                                                                                                                                                                                                                                                                                                                                                                                  |       |       |          |                                                                                                                                                                                                                                                                                                |                     |           |                 |           |        |                 |              |           |                        |    |                |           |          |       |       |  |    |       |       |  |
| <table><tr><th colspan="4">Confusion Matrix</th></tr><tr><th>Actual</th><th colspan="3">Predicted Count</th></tr><tr><th>City</th><th>PJ</th><th>YC</th><th></th></tr><tr><td>PJ</td><td>20</td><td>0</td><td></td></tr><tr><td>YC</td><td>0</td><td>15</td><td></td></tr></table>                                                                                                                                                | Confusion Matrix |       |          |       | Actual              | Predicted Count |                 |           | City | PJ        | YC           |           | PJ                     | 20    | 0              |           | YC       | 0     | 15                                                                                                                                                                                                                                                                                                                                                                                                                               |      | <table><tr><th colspan="4">Confusion Matrix</th></tr><tr><th>Actual</th><th colspan="3">Predicted Count</th></tr><tr><th>City</th><th>PJ</th><th>YC</th><th></th></tr><tr><td>PJ</td><td>11</td><td>0</td><td></td></tr><tr><td>YC</td><td>0</td><td>1</td><td></td></tr></table>              | Confusion Matrix |       |                     |           | Actual          | Predicted Count |      |           | City         | PJ        | YC                     |   | PJ             | 11       | 0        |    | YC                                                                                                                                                                                                                                                                                                                                                                                                                               | 0     | 1     |          | <table><tr><th colspan="4">Confusion Matrix</th></tr><tr><th>Actual</th><th colspan="3">Predicted Count</th></tr><tr><th>City</th><th>PJ</th><th>YC</th><th></th></tr><tr><td>PJ</td><td>8</td><td>0</td><td></td></tr><tr><td>YC</td><td>0</td><td>3</td><td></td></tr></table>               | Confusion Matrix    |           |                 |           | Actual | Predicted Count |              |           | City                   | PJ | YC             |           | PJ       | 8     | 0     |  | YC | 0     | 3     |  |
| Confusion Matrix                                                                                                                                                                                                                                                                                                                                                                                                                  |                  |       |          |       |                     |                 |                 |           |      |           |              |           |                        |       |                |           |          |       |                                                                                                                                                                                                                                                                                                                                                                                                                                  |      |                                                                                                                                                                                                                                                                                                |                  |       |                     |           |                 |                 |      |           |              |           |                        |   |                |          |          |    |                                                                                                                                                                                                                                                                                                                                                                                                                                  |       |       |          |                                                                                                                                                                                                                                                                                                |                     |           |                 |           |        |                 |              |           |                        |    |                |           |          |       |       |  |    |       |       |  |
| Actual                                                                                                                                                                                                                                                                                                                                                                                                                            | Predicted Count  |       |          |       |                     |                 |                 |           |      |           |              |           |                        |       |                |           |          |       |                                                                                                                                                                                                                                                                                                                                                                                                                                  |      |                                                                                                                                                                                                                                                                                                |                  |       |                     |           |                 |                 |      |           |              |           |                        |   |                |          |          |    |                                                                                                                                                                                                                                                                                                                                                                                                                                  |       |       |          |                                                                                                                                                                                                                                                                                                |                     |           |                 |           |        |                 |              |           |                        |    |                |           |          |       |       |  |    |       |       |  |
| City                                                                                                                                                                                                                                                                                                                                                                                                                              | PJ               | YC    |          |       |                     |                 |                 |           |      |           |              |           |                        |       |                |           |          |       |                                                                                                                                                                                                                                                                                                                                                                                                                                  |      |                                                                                                                                                                                                                                                                                                |                  |       |                     |           |                 |                 |      |           |              |           |                        |   |                |          |          |    |                                                                                                                                                                                                                                                                                                                                                                                                                                  |       |       |          |                                                                                                                                                                                                                                                                                                |                     |           |                 |           |        |                 |              |           |                        |    |                |           |          |       |       |  |    |       |       |  |
| PJ                                                                                                                                                                                                                                                                                                                                                                                                                                | 20               | 0     |          |       |                     |                 |                 |           |      |           |              |           |                        |       |                |           |          |       |                                                                                                                                                                                                                                                                                                                                                                                                                                  |      |                                                                                                                                                                                                                                                                                                |                  |       |                     |           |                 |                 |      |           |              |           |                        |   |                |          |          |    |                                                                                                                                                                                                                                                                                                                                                                                                                                  |       |       |          |                                                                                                                                                                                                                                                                                                |                     |           |                 |           |        |                 |              |           |                        |    |                |           |          |       |       |  |    |       |       |  |
| YC                                                                                                                                                                                                                                                                                                                                                                                                                                | 0                | 15    |          |       |                     |                 |                 |           |      |           |              |           |                        |       |                |           |          |       |                                                                                                                                                                                                                                                                                                                                                                                                                                  |      |                                                                                                                                                                                                                                                                                                |                  |       |                     |           |                 |                 |      |           |              |           |                        |   |                |          |          |    |                                                                                                                                                                                                                                                                                                                                                                                                                                  |       |       |          |                                                                                                                                                                                                                                                                                                |                     |           |                 |           |        |                 |              |           |                        |    |                |           |          |       |       |  |    |       |       |  |
| Confusion Matrix                                                                                                                                                                                                                                                                                                                                                                                                                  |                  |       |          |       |                     |                 |                 |           |      |           |              |           |                        |       |                |           |          |       |                                                                                                                                                                                                                                                                                                                                                                                                                                  |      |                                                                                                                                                                                                                                                                                                |                  |       |                     |           |                 |                 |      |           |              |           |                        |   |                |          |          |    |                                                                                                                                                                                                                                                                                                                                                                                                                                  |       |       |          |                                                                                                                                                                                                                                                                                                |                     |           |                 |           |        |                 |              |           |                        |    |                |           |          |       |       |  |    |       |       |  |
| Actual                                                                                                                                                                                                                                                                                                                                                                                                                            | Predicted Count  |       |          |       |                     |                 |                 |           |      |           |              |           |                        |       |                |           |          |       |                                                                                                                                                                                                                                                                                                                                                                                                                                  |      |                                                                                                                                                                                                                                                                                                |                  |       |                     |           |                 |                 |      |           |              |           |                        |   |                |          |          |    |                                                                                                                                                                                                                                                                                                                                                                                                                                  |       |       |          |                                                                                                                                                                                                                                                                                                |                     |           |                 |           |        |                 |              |           |                        |    |                |           |          |       |       |  |    |       |       |  |
| City                                                                                                                                                                                                                                                                                                                                                                                                                              | PJ               | YC    |          |       |                     |                 |                 |           |      |           |              |           |                        |       |                |           |          |       |                                                                                                                                                                                                                                                                                                                                                                                                                                  |      |                                                                                                                                                                                                                                                                                                |                  |       |                     |           |                 |                 |      |           |              |           |                        |   |                |          |          |    |                                                                                                                                                                                                                                                                                                                                                                                                                                  |       |       |          |                                                                                                                                                                                                                                                                                                |                     |           |                 |           |        |                 |              |           |                        |    |                |           |          |       |       |  |    |       |       |  |
| PJ                                                                                                                                                                                                                                                                                                                                                                                                                                | 11               | 0     |          |       |                     |                 |                 |           |      |           |              |           |                        |       |                |           |          |       |                                                                                                                                                                                                                                                                                                                                                                                                                                  |      |                                                                                                                                                                                                                                                                                                |                  |       |                     |           |                 |                 |      |           |              |           |                        |   |                |          |          |    |                                                                                                                                                                                                                                                                                                                                                                                                                                  |       |       |          |                                                                                                                                                                                                                                                                                                |                     |           |                 |           |        |                 |              |           |                        |    |                |           |          |       |       |  |    |       |       |  |
| YC                                                                                                                                                                                                                                                                                                                                                                                                                                | 0                | 1     |          |       |                     |                 |                 |           |      |           |              |           |                        |       |                |           |          |       |                                                                                                                                                                                                                                                                                                                                                                                                                                  |      |                                                                                                                                                                                                                                                                                                |                  |       |                     |           |                 |                 |      |           |              |           |                        |   |                |          |          |    |                                                                                                                                                                                                                                                                                                                                                                                                                                  |       |       |          |                                                                                                                                                                                                                                                                                                |                     |           |                 |           |        |                 |              |           |                        |    |                |           |          |       |       |  |    |       |       |  |
| Confusion Matrix                                                                                                                                                                                                                                                                                                                                                                                                                  |                  |       |          |       |                     |                 |                 |           |      |           |              |           |                        |       |                |           |          |       |                                                                                                                                                                                                                                                                                                                                                                                                                                  |      |                                                                                                                                                                                                                                                                                                |                  |       |                     |           |                 |                 |      |           |              |           |                        |   |                |          |          |    |                                                                                                                                                                                                                                                                                                                                                                                                                                  |       |       |          |                                                                                                                                                                                                                                                                                                |                     |           |                 |           |        |                 |              |           |                        |    |                |           |          |       |       |  |    |       |       |  |
| Actual                                                                                                                                                                                                                                                                                                                                                                                                                            | Predicted Count  |       |          |       |                     |                 |                 |           |      |           |              |           |                        |       |                |           |          |       |                                                                                                                                                                                                                                                                                                                                                                                                                                  |      |                                                                                                                                                                                                                                                                                                |                  |       |                     |           |                 |                 |      |           |              |           |                        |   |                |          |          |    |                                                                                                                                                                                                                                                                                                                                                                                                                                  |       |       |          |                                                                                                                                                                                                                                                                                                |                     |           |                 |           |        |                 |              |           |                        |    |                |           |          |       |       |  |    |       |       |  |
| City                                                                                                                                                                                                                                                                                                                                                                                                                              | PJ               | YC    |          |       |                     |                 |                 |           |      |           |              |           |                        |       |                |           |          |       |                                                                                                                                                                                                                                                                                                                                                                                                                                  |      |                                                                                                                                                                                                                                                                                                |                  |       |                     |           |                 |                 |      |           |              |           |                        |   |                |          |          |    |                                                                                                                                                                                                                                                                                                                                                                                                                                  |       |       |          |                                                                                                                                                                                                                                                                                                |                     |           |                 |           |        |                 |              |           |                        |    |                |           |          |       |       |  |    |       |       |  |
| PJ                                                                                                                                                                                                                                                                                                                                                                                                                                | 8                | 0     |          |       |                     |                 |                 |           |      |           |              |           |                        |       |                |           |          |       |                                                                                                                                                                                                                                                                                                                                                                                                                                  |      |                                                                                                                                                                                                                                                                                                |                  |       |                     |           |                 |                 |      |           |              |           |                        |   |                |          |          |    |                                                                                                                                                                                                                                                                                                                                                                                                                                  |       |       |          |                                                                                                                                                                                                                                                                                                |                     |           |                 |           |        |                 |              |           |                        |    |                |           |          |       |       |  |    |       |       |  |
| YC                                                                                                                                                                                                                                                                                                                                                                                                                                | 0                | 3     |          |       |                     |                 |                 |           |      |           |              |           |                        |       |                |           |          |       |                                                                                                                                                                                                                                                                                                                                                                                                                                  |      |                                                                                                                                                                                                                                                                                                |                  |       |                     |           |                 |                 |      |           |              |           |                        |   |                |          |          |    |                                                                                                                                                                                                                                                                                                                                                                                                                                  |       |       |          |                                                                                                                                                                                                                                                                                                |                     |           |                 |           |        |                 |              |           |                        |    |                |           |          |       |       |  |    |       |       |  |
| <table><tr><th colspan="4">Confusion Rates</th></tr><tr><th>Actual</th><th colspan="3">Predicted Rate</th></tr><tr><th>City</th><th>PJ</th><th>YC</th><th></th></tr><tr><td>PJ</td><td>1.000</td><td>0.000</td><td></td></tr><tr><td>YC</td><td>0.000</td><td>1.000</td><td></td></tr></table>                                                                                                                                    | Confusion Rates  |       |          |       | Actual              | Predicted Rate  |                 |           | City | PJ        | YC           |           | PJ                     | 1.000 | 0.000          |           | YC       | 0.000 | 1.000                                                                                                                                                                                                                                                                                                                                                                                                                            |      | <table><tr><th colspan="4">Confusion Rates</th></tr><tr><th>Actual</th><th colspan="3">Predicted Rate</th></tr><tr><th>City</th><th>PJ</th><th>YC</th><th></th></tr><tr><td>PJ</td><td>1.000</td><td>0.000</td><td></td></tr><tr><td>YC</td><td>0.000</td><td>1.000</td><td></td></tr></table> | Confusion Rates  |       |                     |           | Actual          | Predicted Rate  |      |           | City         | PJ        | YC                     |   | PJ             | 1.000    | 0.000    |    | YC                                                                                                                                                                                                                                                                                                                                                                                                                               | 0.000 | 1.000 |          | <table><tr><th colspan="4">Confusion Rates</th></tr><tr><th>Actual</th><th colspan="3">Predicted Rate</th></tr><tr><th>City</th><th>PJ</th><th>YC</th><th></th></tr><tr><td>PJ</td><td>1.000</td><td>0.000</td><td></td></tr><tr><td>YC</td><td>0.000</td><td>1.000</td><td></td></tr></table> | Confusion Rates     |           |                 |           | Actual | Predicted Rate  |              |           | City                   | PJ | YC             |           | PJ       | 1.000 | 0.000 |  | YC | 0.000 | 1.000 |  |
| Confusion Rates                                                                                                                                                                                                                                                                                                                                                                                                                   |                  |       |          |       |                     |                 |                 |           |      |           |              |           |                        |       |                |           |          |       |                                                                                                                                                                                                                                                                                                                                                                                                                                  |      |                                                                                                                                                                                                                                                                                                |                  |       |                     |           |                 |                 |      |           |              |           |                        |   |                |          |          |    |                                                                                                                                                                                                                                                                                                                                                                                                                                  |       |       |          |                                                                                                                                                                                                                                                                                                |                     |           |                 |           |        |                 |              |           |                        |    |                |           |          |       |       |  |    |       |       |  |
| Actual                                                                                                                                                                                                                                                                                                                                                                                                                            | Predicted Rate   |       |          |       |                     |                 |                 |           |      |           |              |           |                        |       |                |           |          |       |                                                                                                                                                                                                                                                                                                                                                                                                                                  |      |                                                                                                                                                                                                                                                                                                |                  |       |                     |           |                 |                 |      |           |              |           |                        |   |                |          |          |    |                                                                                                                                                                                                                                                                                                                                                                                                                                  |       |       |          |                                                                                                                                                                                                                                                                                                |                     |           |                 |           |        |                 |              |           |                        |    |                |           |          |       |       |  |    |       |       |  |
| City                                                                                                                                                                                                                                                                                                                                                                                                                              | PJ               | YC    |          |       |                     |                 |                 |           |      |           |              |           |                        |       |                |           |          |       |                                                                                                                                                                                                                                                                                                                                                                                                                                  |      |                                                                                                                                                                                                                                                                                                |                  |       |                     |           |                 |                 |      |           |              |           |                        |   |                |          |          |    |                                                                                                                                                                                                                                                                                                                                                                                                                                  |       |       |          |                                                                                                                                                                                                                                                                                                |                     |           |                 |           |        |                 |              |           |                        |    |                |           |          |       |       |  |    |       |       |  |
| PJ                                                                                                                                                                                                                                                                                                                                                                                                                                | 1.000            | 0.000 |          |       |                     |                 |                 |           |      |           |              |           |                        |       |                |           |          |       |                                                                                                                                                                                                                                                                                                                                                                                                                                  |      |                                                                                                                                                                                                                                                                                                |                  |       |                     |           |                 |                 |      |           |              |           |                        |   |                |          |          |    |                                                                                                                                                                                                                                                                                                                                                                                                                                  |       |       |          |                                                                                                                                                                                                                                                                                                |                     |           |                 |           |        |                 |              |           |                        |    |                |           |          |       |       |  |    |       |       |  |
| YC                                                                                                                                                                                                                                                                                                                                                                                                                                | 0.000            | 1.000 |          |       |                     |                 |                 |           |      |           |              |           |                        |       |                |           |          |       |                                                                                                                                                                                                                                                                                                                                                                                                                                  |      |                                                                                                                                                                                                                                                                                                |                  |       |                     |           |                 |                 |      |           |              |           |                        |   |                |          |          |    |                                                                                                                                                                                                                                                                                                                                                                                                                                  |       |       |          |                                                                                                                                                                                                                                                                                                |                     |           |                 |           |        |                 |              |           |                        |    |                |           |          |       |       |  |    |       |       |  |
| Confusion Rates                                                                                                                                                                                                                                                                                                                                                                                                                   |                  |       |          |       |                     |                 |                 |           |      |           |              |           |                        |       |                |           |          |       |                                                                                                                                                                                                                                                                                                                                                                                                                                  |      |                                                                                                                                                                                                                                                                                                |                  |       |                     |           |                 |                 |      |           |              |           |                        |   |                |          |          |    |                                                                                                                                                                                                                                                                                                                                                                                                                                  |       |       |          |                                                                                                                                                                                                                                                                                                |                     |           |                 |           |        |                 |              |           |                        |    |                |           |          |       |       |  |    |       |       |  |
| Actual                                                                                                                                                                                                                                                                                                                                                                                                                            | Predicted Rate   |       |          |       |                     |                 |                 |           |      |           |              |           |                        |       |                |           |          |       |                                                                                                                                                                                                                                                                                                                                                                                                                                  |      |                                                                                                                                                                                                                                                                                                |                  |       |                     |           |                 |                 |      |           |              |           |                        |   |                |          |          |    |                                                                                                                                                                                                                                                                                                                                                                                                                                  |       |       |          |                                                                                                                                                                                                                                                                                                |                     |           |                 |           |        |                 |              |           |                        |    |                |           |          |       |       |  |    |       |       |  |
| City                                                                                                                                                                                                                                                                                                                                                                                                                              | PJ               | YC    |          |       |                     |                 |                 |           |      |           |              |           |                        |       |                |           |          |       |                                                                                                                                                                                                                                                                                                                                                                                                                                  |      |                                                                                                                                                                                                                                                                                                |                  |       |                     |           |                 |                 |      |           |              |           |                        |   |                |          |          |    |                                                                                                                                                                                                                                                                                                                                                                                                                                  |       |       |          |                                                                                                                                                                                                                                                                                                |                     |           |                 |           |        |                 |              |           |                        |    |                |           |          |       |       |  |    |       |       |  |
| PJ                                                                                                                                                                                                                                                                                                                                                                                                                                | 1.000            | 0.000 |          |       |                     |                 |                 |           |      |           |              |           |                        |       |                |           |          |       |                                                                                                                                                                                                                                                                                                                                                                                                                                  |      |                                                                                                                                                                                                                                                                                                |                  |       |                     |           |                 |                 |      |           |              |           |                        |   |                |          |          |    |                                                                                                                                                                                                                                                                                                                                                                                                                                  |       |       |          |                                                                                                                                                                                                                                                                                                |                     |           |                 |           |        |                 |              |           |                        |    |                |           |          |       |       |  |    |       |       |  |
| YC                                                                                                                                                                                                                                                                                                                                                                                                                                | 0.000            | 1.000 |          |       |                     |                 |                 |           |      |           |              |           |                        |       |                |           |          |       |                                                                                                                                                                                                                                                                                                                                                                                                                                  |      |                                                                                                                                                                                                                                                                                                |                  |       |                     |           |                 |                 |      |           |              |           |                        |   |                |          |          |    |                                                                                                                                                                                                                                                                                                                                                                                                                                  |       |       |          |                                                                                                                                                                                                                                                                                                |                     |           |                 |           |        |                 |              |           |                        |    |                |           |          |       |       |  |    |       |       |  |
| Confusion Rates                                                                                                                                                                                                                                                                                                                                                                                                                   |                  |       |          |       |                     |                 |                 |           |      |           |              |           |                        |       |                |           |          |       |                                                                                                                                                                                                                                                                                                                                                                                                                                  |      |                                                                                                                                                                                                                                                                                                |                  |       |                     |           |                 |                 |      |           |              |           |                        |   |                |          |          |    |                                                                                                                                                                                                                                                                                                                                                                                                                                  |       |       |          |                                                                                                                                                                                                                                                                                                |                     |           |                 |           |        |                 |              |           |                        |    |                |           |          |       |       |  |    |       |       |  |
| Actual                                                                                                                                                                                                                                                                                                                                                                                                                            | Predicted Rate   |       |          |       |                     |                 |                 |           |      |           |              |           |                        |       |                |           |          |       |                                                                                                                                                                                                                                                                                                                                                                                                                                  |      |                                                                                                                                                                                                                                                                                                |                  |       |                     |           |                 |                 |      |           |              |           |                        |   |                |          |          |    |                                                                                                                                                                                                                                                                                                                                                                                                                                  |       |       |          |                                                                                                                                                                                                                                                                                                |                     |           |                 |           |        |                 |              |           |                        |    |                |           |          |       |       |  |    |       |       |  |
| City                                                                                                                                                                                                                                                                                                                                                                                                                              | PJ               | YC    |          |       |                     |                 |                 |           |      |           |              |           |                        |       |                |           |          |       |                                                                                                                                                                                                                                                                                                                                                                                                                                  |      |                                                                                                                                                                                                                                                                                                |                  |       |                     |           |                 |                 |      |           |              |           |                        |   |                |          |          |    |                                                                                                                                                                                                                                                                                                                                                                                                                                  |       |       |          |                                                                                                                                                                                                                                                                                                |                     |           |                 |           |        |                 |              |           |                        |    |                |           |          |       |       |  |    |       |       |  |
| PJ                                                                                                                                                                                                                                                                                                                                                                                                                                | 1.000            | 0.000 |          |       |                     |                 |                 |           |      |           |              |           |                        |       |                |           |          |       |                                                                                                                                                                                                                                                                                                                                                                                                                                  |      |                                                                                                                                                                                                                                                                                                |                  |       |                     |           |                 |                 |      |           |              |           |                        |   |                |          |          |    |                                                                                                                                                                                                                                                                                                                                                                                                                                  |       |       |          |                                                                                                                                                                                                                                                                                                |                     |           |                 |           |        |                 |              |           |                        |    |                |           |          |       |       |  |    |       |       |  |
| YC                                                                                                                                                                                                                                                                                                                                                                                                                                | 0.000            | 1.000 |          |       |                     |                 |                 |           |      |           |              |           |                        |       |                |           |          |       |                                                                                                                                                                                                                                                                                                                                                                                                                                  |      |                                                                                                                                                                                                                                                                                                |                  |       |                     |           |                 |                 |      |           |              |           |                        |   |                |          |          |    |                                                                                                                                                                                                                                                                                                                                                                                                                                  |       |       |          |                                                                                                                                                                                                                                                                                                |                     |           |                 |           |        |                 |              |           |                        |    |                |           |          |       |       |  |    |       |       |  |

Figure S17. Prediction results of Neural model of machine learning.

Discriminated by (A) day, (B) variety, and (C) city. All predictions were performed with same dataset comprised of randomly allocated training, validation, and test set.

Script S1. Python code for prediction of the discriminative classes.

```
""" NOTE: "jmp_score.py" file must be in the same directory to perform the
predictions"""

""" import generated python codes for prediction from JMP """
import neural_day
import neural_variety
import neural_city
import BF_day
import BT_variety
import BT_city

""" import library for data analysis """
import pandas as pd

""" read test dataset """
df = pd.read_excel('test_dataset.xlsx')

""" apply the prediction code to the test dataset and append the results"""
df['pred_neural_day'] = df[neural_day.getInputMetadata()].apply(lambda s:
neural_day.score(s, {}), axis=1)
df['pred_neural_variety'] =
df[neural_variety.getInputMetadata()].apply(lambda s:
neural_variety.score(s, {}), axis=1)
df['pred_neural_city'] = df[neural_city.getInputMetadata()].apply(lambda s:
neural_city.score(s, {}), axis=1)
df['pred_BF_day'] = df[BF_day.getInputMetadata()].apply(lambda s:
BF_day.score(s, {}), axis=1)
df['pred_BT_variety'] = df[BT_variety.getInputMetadata()].apply(lambda s:
BT_variety.score(s, {}), axis=1)
df['pred_BT_city'] = df[BT_city.getInputMetadata()].apply(lambda s:
BT_city.score(s, {}), axis=1)

""" print the predictions with the originals"""
prd=
df[['Day','pred_neural_day','pred_BF_day','Variety','pred_neural_variety','
pred_BT_variety', 'City','pred_neural_city','pred_BT_city']]
prd
```

\*Designated file: ML\_prediction.py

To obtain the designated results, following files must be in the same directory; neural\_day.py, neural\_variety.py, neural\_city.py, BF\_day.py, BT\_variety.py, BT\_city.py, jmp\_score.py, and test\_dataset.xlsx. Refer to the printed results in Table S9. The code can be executed in Python (Python Software Foundation; [www.python.org](http://www.python.org)) environments.
